# Supplementary material for: Direct enantioselective α-alkylation of secondary acyclic amines with ketones by combining photocatalysis and lipase catalytic promiscuity
Source: Royal Society of Chemistry journal article supplement (doi:10.1039/d3qo00951c), 2023-01-01
Supplement: d3qo00951c1.pdf [file d3qo00951c1.pdf]

## Supporting Information

### **Direct enantioselective $\alpha$ -alkylation of secondary acyclic amines with ketones by combining photocatalysis and lipase catalytic promiscuity**

Chao-Jiu Long,<sup>‡1</sup> Hong-Ping Pu,<sup>‡1</sup> Yan-Hong He\*<sup>1</sup> and Zhi Guan\*<sup>1</sup>

<sup>1</sup> Key Laboratory of Applied Chemistry of Chongqing Municipality, School of Chemistry and  
Chemical Engineering, Southwest University, Chongqing 400715, China

Emails: heyh@swu.edu.cn (for Y.-H. He); guanzhi@swu.edu.cn (for Z. Guan)

<sup>‡</sup> These authors contributed equally to this work.

## Table of Contents

|                                                                                                                                        |     |
|----------------------------------------------------------------------------------------------------------------------------------------|-----|
| 1. General information .....                                                                                                           | S1  |
| 2. General procedure for the photoenzyme-catalyzed enantioselective $\alpha$ -alkylation of secondary acyclic amines with ketones..... | S2  |
| 3. Preparation of substrates <b>1</b> .....                                                                                            | S3  |
| 4. General procedure for preparing racemic products as chiral HPLC controls.....                                                       | S4  |
| 5. Optimization details .....                                                                                                          | S5  |
| 6. Enzymatic assay of natural activity of PPL.....                                                                                     | S9  |
| 7. Stern-Volmer luminescence quenching experiments.....                                                                                | S10 |
| 8. Cyclic voltammetry studies .....                                                                                                    | S11 |
| 9. Unsuccessful substrates.....                                                                                                        | S12 |
| 10. Characterization data of the products.....                                                                                         | S12 |
| 11. Comparison of dr determined by HPLC and <sup>1</sup> HNMR analysis of mixture .....                                                | S27 |
| 12. References.....                                                                                                                    | S37 |
| 13. NMR spectra .....                                                                                                                  | S38 |
| 14. HRMS spectra .....                                                                                                                 | S64 |
| 15. Chiral HPLC spectra .....                                                                                                          | S69 |

## 1. General information

Lipase from porcine pancreas (PPL) – Type II [lyophilized powder, L3126-25G, Lot # SLCJ9303, 33% protein (Biuret), 39 units/mg protein (one unit will hydrolyze 1.0 microequivalent of fatty acid from Triacetin in 1 h at pH 7.4 at 37 °C), with a molecular weight of 50 – 52 kDa],<sup>[1]</sup> protease from *Streptomyces griseus* (SGP) – Type XIV [lyophilized powder, P5147-1G, Lot # SLBD9380V, 5.2 units/mg solid (one unit will hydrolyze casein to produce color equivalent to 1.0 µmol of Tyrosine per minute at pH 7.5 at 37 °C)], lipase from wheat germ (WGL) – Type I [lyophilized powder, L3001-5G, Lot # SLCF4529, 8 units/mg solid (one unit will hydrolyze 1.0 microequivalent of fatty acid from a triglyceride in 1 h at pH 7.4 at 37 °C), with a molecular weight of 141 – 145kDa (determined by gel chromatography)],<sup>[2]</sup> acylase I from *Aspergillus melleus* (AMA) [lyophilized powder, 01818-25G, Lot # 1348941V, 0.58 units/mg solid (one unit corresponds to the amount of enzyme which hydrolyzes 1.0 µmol *N*-acetyl-*L*-methionine per minute at pH 8.0 at 37 °C)], lysozyme chicken egg white (CEWL) (lyophilized powder, 6971-10G-F, Lot # BCBJ2814V, 102375 units/mg solid), papain carica papaya (CPP) [lyophilized powder, 76220-25G, Lot # BCBD3116V, 3.6 units/mg solid (one unit corresponds to the amount of enzyme which hydrolyzes 1.0 µmol *N*-benzoyl-*L*-arginine ethyl ester (BAEE, fluka No. 12880) per minute at pH 6.2 at 25 °C)], lipase A *Candida antarctica* immobilized on imobead 150, recombinant *Aspergillus oryzae* (CALA) [lyophilized powder, 41658-10G, Lot # BCBC1259V, 1624 units/g (one unit corresponds to the amount of enzyme which liberates 1.0 µmol butyric acid per minute at pH 10.0 at 40 °C, tributyrin, fluka No. 91010, as substrate)], lipase B *Candida antarctica* immobilized on imobead 150, recombinant yeast (CALB) [lyophilized powder, 52583-10G, Lot # BCBB5644, 3766 units/g solid (one unit corresponds to the amount of enzyme which liberates 1.0 µmol butyric acid per minute at pH 7.5 at 40 °C, tributyrin, fluka No. 91010, as substrate)], and amyloglucosidase *aspergillus niger* (ANA) [lyophilized powder, 10115-1G-F, Lot # BCBF3497V, 62.4 units/g solid (one unit corresponds to the amount of enzyme which liberates 1.0 µmol of glucose per minute at pH 4.8 at 60 °C, starch acc. to Zulkowsky, cat. No. 85642, as substrate)] were purchased from Sigma-Aldrich, Shanghai, China. Nuclease P1 from *Penicillium citrinum* (EC 3.1.30.1, lyophilized powder, 5 units/mg solid. The activity was measured in terms of the amount of acid-soluble nucleotides produced by RNA hydrolysis which is catalyzed by nuclease P1. One unit of enzyme activity was

defined as the amount of enzyme that produced an increase in the optical density of 1.0 in 1 min at 260 nm) was purchased from Nanning Pangbo Biological Engineering Co. Ltd., Nanning, China.

Unless otherwise noted, all chemicals and reagents were purchased from commercial suppliers and were used without further purification. All glassware was oven-dried at 120 °C. All photoreactions were conducted in single neck round bottom flask unless otherwise noted. The light source was a 9 W blue LED lamp (450 nm, placed approximately 5 cm from the reaction flask) without any filters. All reactions were monitored by thin-layer chromatography (TLC) with GF 254 silica gel pre-coated plates (0.25 mm, Qingdao Haiyang chemical industry Co. Ltd., Qingdao, China) using UV light and vanillic aldehyde as visualizing agents. Flash chromatography was performed using silica gel (200-300 mesh) at increased pressure. NMR spectra were recorded on Bruker AVANCE III (400 MHz) and Bruker AVANCE DMX600 (600 MHz) spectrometers. Chemical shifts for  $^1\text{H}$  NMR and  $^{13}\text{C}$  NMR were referenced to TMS (0.00 ppm) or residual undeuterated solvent signals (7.26 ppm for  $^1\text{H}$  NMR in  $\text{CDCl}_3$ , 77.16 ppm for  $^{13}\text{C}$  NMR in  $\text{CDCl}_3$ ) respectively.  $^{19}\text{F}$  NMR data were calibrated using  $\text{CFCl}_3$  as an external reference (0.0 ppm). Data for NMR are reported as follows: chemical shift (ppm), integration, multiplicity (s = singlet, d = doublet, t = triplet, q = quartet, p = pentet, dd = doublet of doublets, br = broad and m = multiplet), and coupling constant (Hz). High-resolution mass spectra (HRMS) were acquired on Bruker Impact II TOF mass spectrometer using ESI ionization sources. The diastereomeric ratio (dr) and enantiomeric excess (ee) of products were determined by chiral HPLC analysis carried out on a Shimadzu LC-20A instrument using Chiralpak AD-H, Chiralpak OD-H, Chiralpak AS-H and Chiralpak OJ-H (0.46 cm  $\Phi$   $\times$  25 cm, 5  $\mu\text{m}$ , Daicel Chiral Technologies CO., LTD.). Cyclic voltammograms were obtained on a CHI 700E potentiostat (CH Instruments, Inc.).

## 2. General procedure for the photoenzyme-catalyzed enantioselective $\alpha$ -alkylation of secondary acyclic amines with ketones

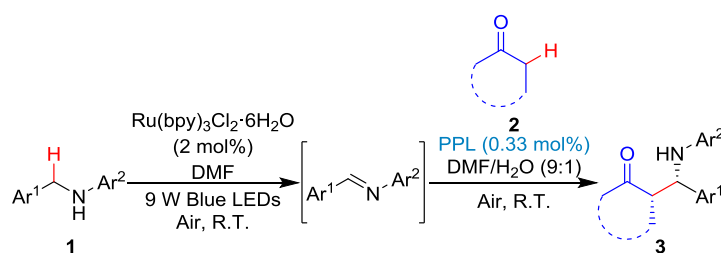

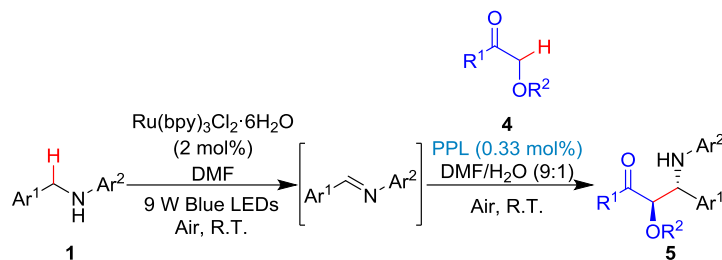

To a 10 mL round-bottom flask equipped with a magnetic stirring bar was added **1** (0.3 mmol, 1.0 equiv), Ru(bpy)<sub>3</sub>Cl<sub>2</sub>·6H<sub>2</sub>O (4 mg, 0.006 mmol, 2 mol%), and DMF (dried over 3 Å molecular sieves, 2.7 mL). The mixture was irradiated with a 9 W blue LED lamp under the air atmosphere at room temperature. After full conversion of **1** as monitored by TLC, the light was turned off. Ketone [**2** (1.5 mmol, 5.0 equiv) or **4** (3.0 mmol, 10.0 equiv), as indicated], PPL (150 mg, 1930 U, 0.33 mol%) and deionized water (0.3 mL) were added, then the mixture was stirred without light. The reaction was monitored by TLC. After completion of the reaction, the mixture was diluted with 20 mL EtOAc and filtered. The filtrate was washed with brine (10 mL × 2). The organic phase was dried over anhydrous Na<sub>2</sub>SO<sub>4</sub> and filtered. The filtrate was collected and concentrated in vacuum to remove the solvent. The residue was purified by flash column chromatography on silica gel using petroleum ether/EtOAc (v/v, 20:1 to 5:1) as eluent to obtain the corresponding product **3** or **5**.

### 3. Preparation of substrates **1**

The following substrates **1** were purchased from commercial sources (Figure S1).

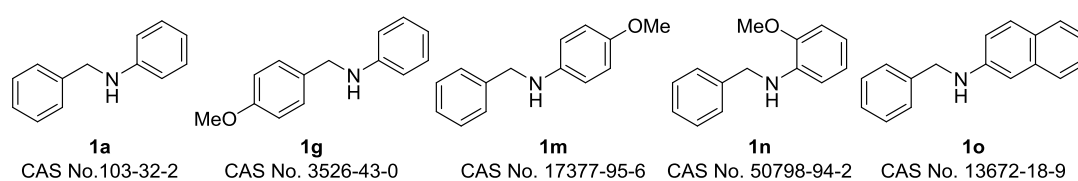

**Figure S1.** Substrates **1** purchased from commercial sources.

The other substrates **1** were synthesized according to literature (Figure S2).

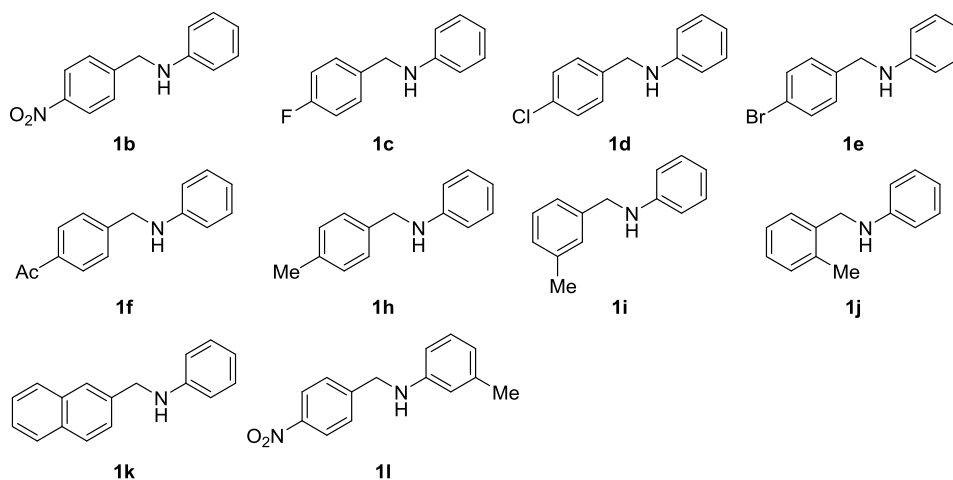

**Figure S2.** Substrates **1** synthesized according to the literature.

### General procedure<sup>[3]</sup>

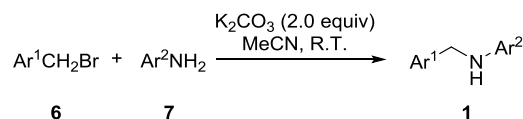

A 100 mL round-bottomed flask equipped with a magnetic stirring bar was charged with **6** (5.0 mmol, 1.0 equiv), **7** (7.5 mmol, 1.5 equiv), K<sub>2</sub>CO<sub>3</sub> (1.38 g, 10.0 mmol, 2.0 equiv) and MeCN (70 mL). The reaction mixture was vigorously stirred at room temperature. The reaction was monitored by TLC. Upon completion, the reaction mixture was filtered by Celite and washed with EtOAc. The filtrate was collected and concentrated in vacuum to remove the solvent. The residue was directly submitted to flash column chromatography on silica gel using petroleum ether/EtOAc (300:1 to 20:1) to obtain the corresponding compound **1**.

### 4. General procedure for preparing racemic products as chiral HPLC controls<sup>[3]</sup>

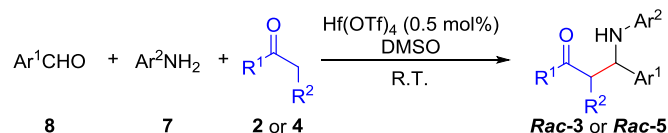

A round-bottomed flask equipped with a magnetic stirring bar was charged with **8** (0.3 mmol, 1.0 equiv), **7** (0.3 mmol, 1.0 equiv), **2** or **4** (1.5 mmol, 5.0 equiv), Hf(OTf)<sub>4</sub> (1.2 mg, 0.0015 mmol, 0.5 mol%) and DMSO (3.0 mL). The reaction mixture was stirred at room temperature and monitored by TLC. After completion of the reaction, CH<sub>2</sub>Cl<sub>2</sub> (5 mL) was added to the reaction to dissolve the residue. The crude product was purified by preparative thin layer chromatography (silica gel, petroleum ether/EtOAc = 5:1 to 1:1) to give the desired racemic product (*Rac-3* or *Rac-5*).

## 5. Optimization details

**Table S1.** Screening of enzymes.<sup>[a]</sup>

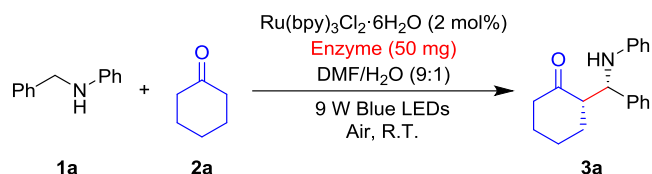

| Entry | Enzyme                                    | Yield [%] <sup>[b]</sup> | dr [ <i>syn/anti</i> ] <sup>[c]</sup> | er [ <i>syn (anti)</i> ] <sup>[c]</sup> |
|-------|-------------------------------------------|--------------------------|---------------------------------------|-----------------------------------------|
| 1     | Lipase from porcine pancreas              | 21                       | 73/27                                 | 78/22 (56/44)                           |
| 2     | Protease from <i>streptomyces griseus</i> | 18                       | 82/18                                 | 78/22 (56/44)                           |
| 3     | Lipase from wheat germ                    | 6                        | 44/56                                 | 53/47 (52/48)                           |
| 4     | Acylase I from <i>aspergillus melleus</i> | 10                       | 53/47                                 | 67/33 (50/50)                           |
| 5     | Lysozyme chicken egg white                | 22                       | 32/68                                 | 50/50 (50/50)                           |
| 6     | Papain carica papaya                      | 12                       | 54/46                                 | 58/42 (50/50)                           |
| 7     | Lipase A candida Antarctica               | 10                       | 38/62                                 | 51/49 (51/49)                           |
| 8     | Lipase B candida Antarctica               | 10                       | 36/64                                 | 50/50 (50/50)                           |
| 9     | Nuclease P1                               | 15                       | 38/62                                 | 54/46 (51/49)                           |
| 10    | Amyloglucosidase <i>aspergillus niger</i> | 8                        | 47/53                                 | 59/41 (50/50)                           |

[a] Reaction conditions: **1a** (55 mg, 0.3 mmol, 1.0 equiv), **2a** (467  $\mu$ L, 4.5 mmol, 15.0 equiv), Ru(bpy)<sub>3</sub>Cl<sub>2</sub>·6H<sub>2</sub>O (4 mg, 0.006 mmol, 2 mol%), enzyme (50 mg) and deionized water (0.3 mL) in DMF (dried over 3 Å molecular sieves, 2.7 mL) irradiated with 9 W blue LEDs under air at room temperature. [b] Isolated yield. [c] Determined by HPLC analysis using a chiralpak OJ-H column.

**Table S2.** Screening of addition procedures.<sup>[a]</sup>

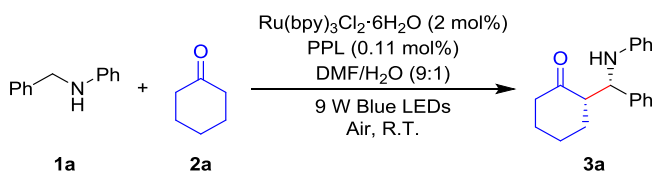

| Entry | Method <sup>[b]</sup> | Yield [%] <sup>[c]</sup> | dr [ <i>syn/anti</i> ] <sup>[d]</sup> | er [ <i>syn (anti)</i> ] <sup>[d]</sup> |
|-------|-----------------------|--------------------------|---------------------------------------|-----------------------------------------|
| 1     | A                     | 21                       | 73/27                                 | 78/22 (56/44)                           |
| 2     | B                     | 14                       | 71/29                                 | 77/23 (53/47)                           |

[a] Reaction conditions: **1a** (55 mg, 0.3 mmol, 1.0 equiv), **2a** (467  $\mu$ L, 4.5 mmol, 15.0 equiv), Ru(bpy)<sub>3</sub>Cl<sub>2</sub>·6H<sub>2</sub>O (4 mg, 0.006 mmol, 2 mol%), PPL (50 mg, 644 U, 0.11 mol%) and deionized water (0.3 mL) in DMF (dried over 3Å molecular sieves, 2.7 mL) irradiated with 9 W blue LEDs under air at room temperature. [b] Method A: all components were added at one time and irradiation; Method B: **2a** and PPL were added after the photo-oxidation process was completed, and then the mixture was stirred without light; Method C: **2a**, PPL and deionized water were added after the photo-oxidation process was completed, and then the mixture was stirred without light. [c] Isolated yield. [d] Determined by HPLC analysis using a chiralpak OJ-H column.

**Table S3.** Screening the amount of PPL.<sup>[a]</sup>

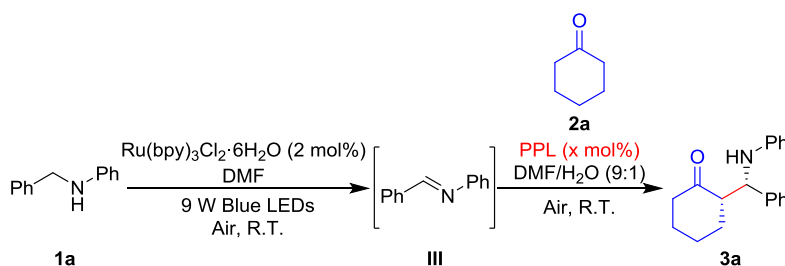

| Entry | PPL  |        | Yield [%] <sup>[b]</sup> | dr [ <i>syn/anti</i> ] <sup>[c]</sup> | er [ <i>syn (anti)</i> ] <sup>[c]</sup> |
|-------|------|--------|--------------------------|---------------------------------------|-----------------------------------------|
|       | [mg] | [mol%] |                          |                                       |                                         |
| 1     | 25   | 0.06   | 45                       | 60/40                                 | 70/30 (55/45)                           |
| 2     | 50   | 0.11   | 59                       | 74/26                                 | 78/22 (59/41)                           |
| 3     | 100  | 0.22   | 67                       | 76/24                                 | 77/23 (59/41)                           |
| 4     | 150  | 0.33   | 78                       | 77/23                                 | 79/21 (57/43)                           |
| 5     | 200  | 0.44   | 76                       | 75/25                                 | 77/23 (58/42)                           |
| 6     | 300  | 0.66   | 73                       | 75/25                                 | 76/24 (59/41)                           |

[a] Reaction conditions: **1a** (55 mg, 0.3 mmol, 1.0 equiv) and Ru(bpy)<sub>3</sub>Cl<sub>2</sub>·6H<sub>2</sub>O (4 mg, 0.006 mmol, 2 mol%) in DMF (dried over 3Å molecular sieves, 2.7 mL) irradiated with 9 W blue LEDs under air at room temperature. After full conversion of **1a**, the light was turned off. **2a** (467  $\mu$ L, 4.5 mmol, 15.0 equiv), PPL and deionized water (0.3 mL) were added. [b] Isolated yield. [c] Determined by HPLC analysis using a chiralpak OJ-H column.

**Table S4.** Screening of solvents.<sup>[a]</sup>



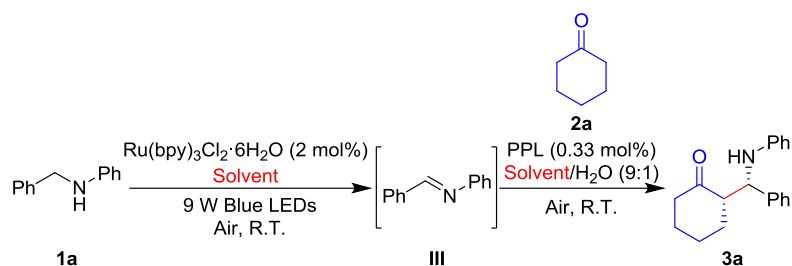

| Entry | Solvent | Yield [%] <sup>[b]</sup> | dr [ <i>syn/anti</i> ] <sup>[c]</sup> | er [ <i>syn (anti)</i> ] <sup>[c]</sup> |
|-------|---------|--------------------------|---------------------------------------|-----------------------------------------|
| 1     | DMF     | 78                       | 77/23                                 | 79/21 (57/43)                           |
| 2     | MeCN    | ND <sup>[d]</sup>        | —                                     | —                                       |
| 3     | EtOH    | 27                       | 75/25                                 | 76/24 (58/42)                           |
| 4     | IPA     | 20                       | 78/22                                 | 77/23 (56/44)                           |
| 5     | DCM     | NR <sup>[e]</sup>        | —                                     | —                                       |
| 6     | THF     | NR <sup>[e]</sup>        | —                                     | —                                       |

[a] Reaction conditions: **1a** (55 mg, 0.3 mmol, 1.0 equiv) and Ru(bpy)<sub>3</sub>Cl<sub>2</sub>·6H<sub>2</sub>O (4 mg, 0.006 mmol, 2 mol%) in solvent (dried over molecular sieves, 2.7 mL) irradiated with 9 W blue LEDs under air at room temperature. After full conversion of **1a**, the light was turned off. **2a** (467 μL, 4.5 mmol, 15.0 equiv), PPL (150 mg, 1930 U, 0.33 mol%) and deionized water (0.3 mL) were added. [b] Isolated yield. [c] Determined by HPLC analysis using a chiralpak OJ-H column. [d] Not detected. [e] No reaction.

**Table S5.** Water content screening.<sup>[a]</sup>

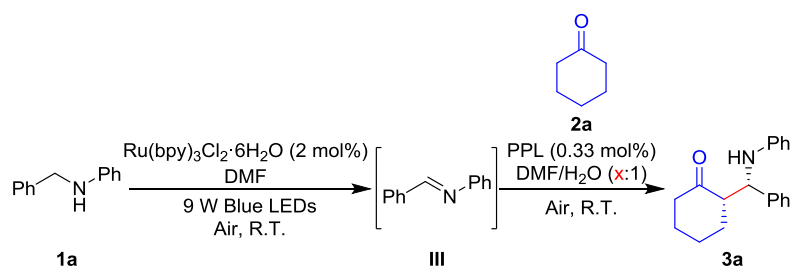

| Entry | Water [mL] | DMF/H <sub>2</sub> O [v/v] | Water content [%] | Yield [%] <sup>[b]</sup> | dr [ <i>syn/anti</i> ] <sup>[c]</sup> | er [ <i>syn (anti)</i> ] <sup>[c]</sup> |
|-------|------------|----------------------------|-------------------|--------------------------|---------------------------------------|-----------------------------------------|
| 1     | 0          | —                          | 0                 | Trace                    | —                                     | —                                       |
| 2     | 0.15       | 18/1                       | 5.26              | 59                       | 68/32                                 | 70/30 (50/50)                           |
| 3     | 0.30       | 9/1                        | 10.00             | 78                       | 77/23                                 | 79/21 (57/43)                           |

|   |      |     |       |    |       |               |
|---|------|-----|-------|----|-------|---------------|
| 4 | 0.45 | 6/1 | 14.28 | 67 | 75/25 | 76/24 (55/45) |
| 5 | 0.90 | 3/1 | 25.00 | 69 | 71/29 | 73/27 (53/47) |

[a] Reaction conditions: **1a** (55 mg, 0.3 mmol, 1.0 equiv) and Ru(bpy)<sub>3</sub>Cl<sub>2</sub>·6H<sub>2</sub>O (4 mg, 0.006 mmol, 2 mol%) in DMF (dried over 3Å molecular sieves, 2.7 mL) irradiated with 9 W blue LEDs under air at room temperature. After full conversion of **1a**, the light was turned off. **2a** (467 μL, 4.5 mmol, 15.0 equiv), PPL (150 mg, 1930 U, 0.33 mol%) and deionized water were added. [b] Isolated yield. [c] Determined by HPLC analysis using a chiralpak OJ-H column.

**Table S6.** Screening the amount of cyclohexanone (**2a**).<sup>[a]</sup>

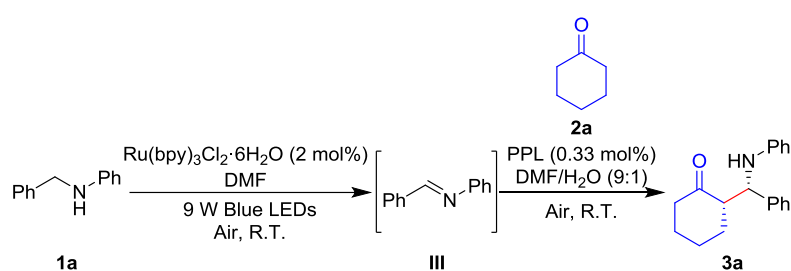

| Entry | <b>2a</b> [equiv] | Yield [%] <sup>[b]</sup> | dr [ <i>syn/anti</i> ] <sup>[c]</sup> | er [ <i>syn (anti)</i> ] <sup>[c]</sup> |
|-------|-------------------|--------------------------|---------------------------------------|-----------------------------------------|
| 1     | 2.5               | 65                       | 73/27                                 | 77/23 (58/42)                           |
| 2     | 5.0               | 78                       | 75/25                                 | 79/21 (59/41)                           |
| 3     | 10.0              | 75                       | 75/25                                 | 78/22 (53/47)                           |
| 4     | 15.0              | 78                       | 77/23                                 | 79/21 (57/43)                           |
| 5     | 20.0              | 71                       | 77/23                                 | 78/22 (59/41)                           |
| 6     | 25.0              | 67                       | 75/25                                 | 77/23 (55/45)                           |

[a] Reaction conditions: **1a** (55 mg, 0.3 mmol, 1.0 equiv) and Ru(bpy)<sub>3</sub>Cl<sub>2</sub>·6H<sub>2</sub>O (4 mg, 0.006 mmol, 2 mol%) in DMF (dried over 3Å molecular sieves, 2.7 mL) irradiated with 9 W blue LEDs under air at room temperature. After full conversion of **1a**, the light was turned off. **2a**, PPL (150 mg, 1930 U, 0.33 mol%) and deionized water (0.3 mL) were added. [b] Isolated yield. [c] Determined by HPLC analysis using a chiralpak OJ-H column.

**Table S7.** Screening the amount of hydroxyacetone (**4a**).<sup>[a]</sup>

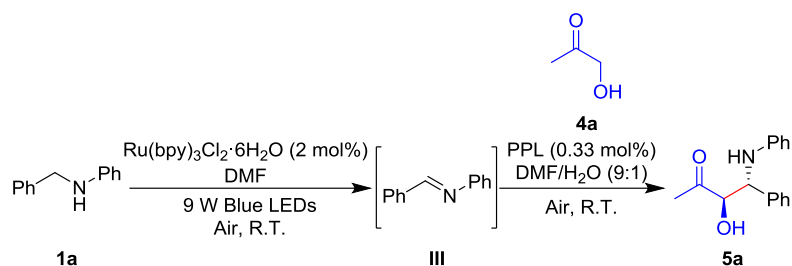

| Entry | <b>4a</b> [equiv] | Yield [%] <sup>[b]</sup> | dr [ <i>anti/syn</i> ] <sup>[c]</sup> | er [ <i>anti (syn)</i> ] <sup>[c]</sup> |
|-------|-------------------|--------------------------|---------------------------------------|-----------------------------------------|
| 1     | 5.0               | 66                       | 73/27                                 | 85/15 (59/41)                           |
| 2     | 10.0              | 81                       | 76/24                                 | 88/12 (62/38)                           |
| 3     | 15.0              | 81                       | 75/25                                 | 88/12 (60/40)                           |
| 4     | 20.0              | 79                       | 76/24                                 | 88/12 (60/40)                           |
| 5     | 25.0              | 75                       | 78/22                                 | 87/13 (63/37)                           |

[a] Reaction conditions: **1a** (55 mg, 0.3 mmol, 1.0 equiv) and Ru(bpy)<sub>3</sub>Cl<sub>2</sub>·6H<sub>2</sub>O (4 mg, 0.006 mmol, 2 mol%) in DMF (dried over 3Å molecular sieves, 2.7 mL) irradiated with 9 W blue LEDs under air at room temperature. After full conversion of **1a**, the light was turned off. **4a**, PPL (150 mg, 1930 U, 0.33 mol%) and deionized water (0.3 mL) were added. [b] Isolated yield. [c] Determined by HPLC analysis using a chiralpak AD-H column.

## 6. Enzymatic assay of natural activity of PPL

The natural activity of PPL was determined according to the procedure described in literature.<sup>[3]</sup> The results showed that the native activity of PPL was significantly decreased after denatured and inhibitor pretreatment. Therefore, the natural active center of PPL might be essential for the catalytic activity.

**Table S8.** The natural activity of denatured and inhibitor-pretreated PPL.

| Entry | Pretreatment of PPL                            | Natural activity of PPL [U/mg protein] <sup>[a]</sup> |
|-------|------------------------------------------------|-------------------------------------------------------|
| 1     | PPL                                            | 39                                                    |
| 2     | High-temperature-pretreated PPL <sup>[b]</sup> | 5                                                     |
| 3     | GuHCl-pretreated PPL <sup>[c]</sup>            | 6                                                     |
| 4     | PMSF-pretreated PPL <sup>[d]</sup>             | 6                                                     |
| 5     | DEPC-pretreated PPL <sup>[e]</sup>             | 8                                                     |
| 6     | DCC-pretreated PPL <sup>[f]</sup>              | 10                                                    |

[a] One unit will hydrolyze 1.0 microequivalent of fatty acid from Triacetin in 1 h at pH 7.4 at 37 °C. 33% protein (Biuret). [b] PPL (150 mg, 1930 U) in deionized water (3.0 mL) was stirred at 100 °C for 3 days, then the water was removed under reduced pressure. [c] PPL (150 mg, 1930 U) and GuHCl (1.74 g, 18.0 mmol) in deionized water (3.0 mL) was stirred at 30 °C for 10 h, the water was removed by lyophilization. [d] PPL (150 mg, 1930 U) and PMSF (314 mg, 1.8 mmol) in THF (3.0 mL) was stirred at 30 °C for 10 h, then THF was removed under reduced pressure. [e] PPL (150 mg, 1930 U) and DEPC (145 mg, 0.90 mmol) in phosphate buffer ( $\text{NaH}_2\text{PO}_4/\text{Na}_2\text{HPO}_4$ , pH = 8.0, 3.0 mL) was stirred at 37 °C for 2 h, then water was removed by lyophilization. [f] PPL (150 mg, 1930 U) and DCC (620 mg, 3.0 mmol) in deionized water (3.0 mL) was stirred at 30 °C for 2 h, then water was removed by lyophilization.

## 7. Stern-Volmer luminescence quenching experiments

The measurements were performed using a 0.05 mM solution of  $\text{Ru}(\text{bpy})_3\text{Cl}_2 \cdot 6\text{H}_2\text{O}$  in DMF with varying concentration of a quencher. The samples were excited at 450 nm and emission intensity was recorded at 622 nm. The results showed that **1a** could significantly quench the excited state of  $\text{Ru}^{2+}$  (Figure S3, Figure S4).

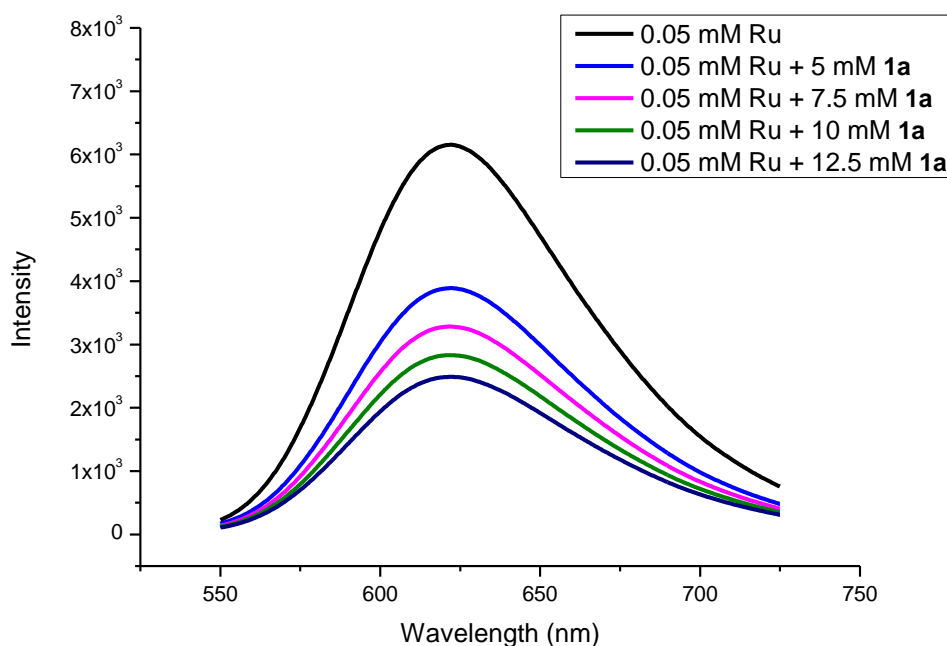

**Figure S3.** Fluorescence quenching of 0.05 mM  $\text{Ru}(\text{bpy})_3\text{Cl}_2 \cdot 6\text{H}_2\text{O}$  (in DMF) by increasing

concentration of **1a**.

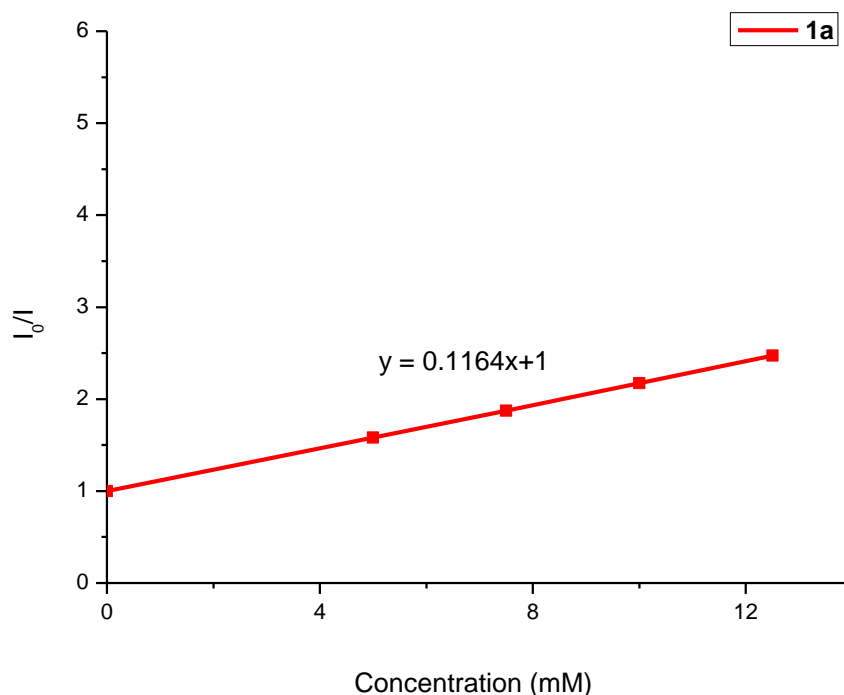

**Figure S4.** Stern-Volmer plots of fluorescence quenching 0.05 mM Ru(bpy)<sub>3</sub>Cl<sub>2</sub>·6H<sub>2</sub>O (in DMF) by **1a**.

## 8. Cyclic voltammetry studies

The cyclic voltammetry experiments were performed in a three-electrode undivided cell, and were recorded with a CHI 700E potentiostat (CH Instruments, Inc.) at room temperature in MeCN (15 mL). *n*-Bu<sub>4</sub>NPF<sub>6</sub> (0.05 M) was used as the supporting electrolyte, and the concentration of the tested compound was 2.0 mM. The scan rate was 100 mV/s. The potential ranges investigated for oxidations were 0 to +2.0 V vs. SCE (saturated aqueous KCl). CV plotting convention is IUPAC.

**Working electrode:** The working electrode is a 3 mm diameter glassy carbon working electrode. Polished with 0.05 μm aluminum oxide and then sonicated in distilled water and ethanol before measurements.

**Reference electrode:** The reference electrode is SCE (saturated aqueous KCl) that was washed with water and ethanol before measurements.

**Counter electrode:** The counter electrode is a platinum wire that was polished with 0.05 μm aluminum oxide and then sonicated in distilled water and ethanol before measurements.

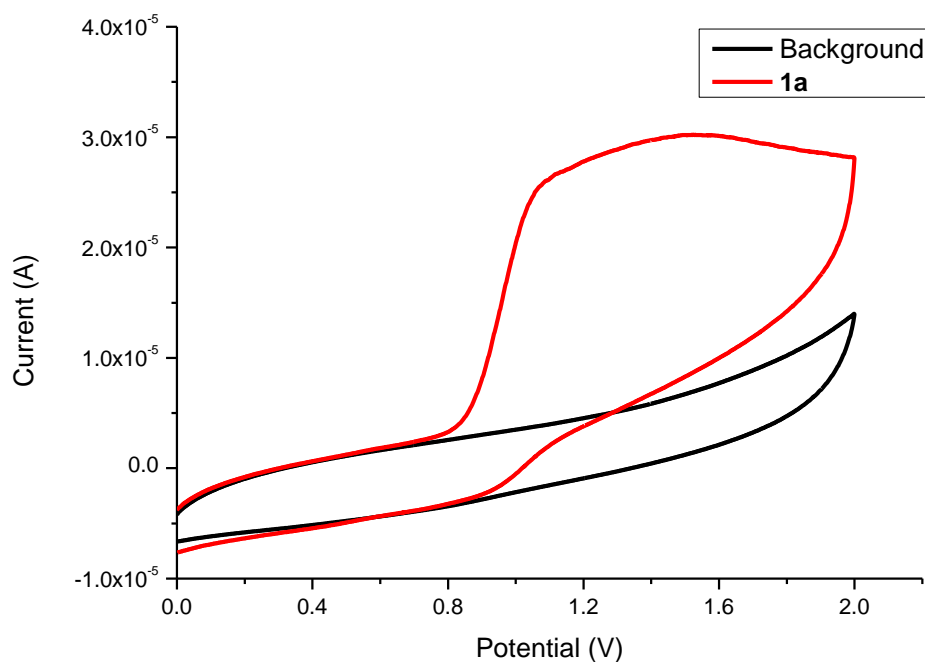

**Figure S5.** Cyclic voltammograms of background and **1a** (2 mM) in an electrolyte of  $n\text{-Bu}_4\text{NPF}_6$  (0.05 mM) in MeCN from 0 to +2.0 V. The onset potential for the oxidation of **1a** is around +0.69 V and the  $E_{\text{ox}}$  is approximately +1.08 V.

## 9. Unsuccessful substrates

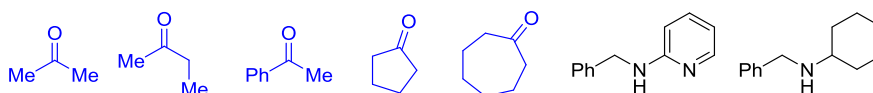

**Figure S6.** Unsuccessful substrates.

## 10. Characterization data of the products

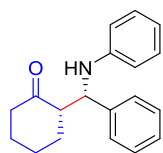

### (*S*)-2-((*S*)-Phenyl(phenylamino)methyl)cyclohexan-1-one (**3a**)<sup>[3]</sup>

Followed the general procedure (Irradiation was conducted for 12 h, followed by the enzyme-catalyzed reaction for 38 h). 65 mg, 78% yield, white solid. **Diastereomeric ratio (dr):** 75:25.

**Enantiomeric ratio (er):** 79:21 (*syn*), 59:41 (*anti*).  $R_f = 0.35$  (Petroleum ether/EtOAc, v/v, 5:1).

Mixture of two diastereomers:  $^1\text{H NMR}$  (600 MHz,  $\text{CDCl}_3$ ):  $\delta$  7.37 – 7.32 (m, 2H), 7.31 – 7.25 (m,

2H), 7.22 – 7.18 (m, 1H), 7.06 (t,  $J = 7.5$  Hz, 2H), 6.67 – 6.59 (m, 1H), 6.57 – 6.51 (m, 2H), 4.80 (d,  $J = 3.6$  Hz, 0.75H), 4.62 (d,  $J = 6.9$  Hz, 0.25H), 2.83 – 2.71 (m, 1H), 2.43 – 2.38 (m, 1H), 2.33 – 2.26 (m, 1H), 2.09 – 2.03 (m, 1H), 2.02 – 1.98 (m, 0.75H), 1.92 – 1.84 (m, 1.25H), 1.71 – 1.54 (m, 3H).  **$^{13}\text{C}$  NMR (151 MHz,  $\text{CDCl}_3$ ):**  $\delta$  212.7, 211.2, 147.5, 147.2, 141.7, 141.6, 129.1, 129.0, 128.5, 128.4, 127.5, 127.3, 127.2, 127.0, 117.7, 117.6, 114.1, 113.7, 58.1, 57.5, 57.4, 56.6, 42.4, 41.8, 31.3, 28.7, 27.8, 27.0, 24.8, 23.7. **HPLC:** Daicel Chiralpak OJ-H, hexane/isopropanol = 80:20, flow rate 0.75 mL/min,  $\lambda = 254$  nm, retention time: 27.549 min (*syn* major enantiomer), 21.125 min (*syn* minor enantiomer), 18.291 min (*anti* major enantiomer), 12.999 min (*anti* minor enantiomer).

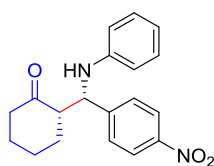

**(S)-2-((S)-(4-Nitrophenyl)(phenylamino)methyl)cyclohexan-1-one (3b)<sup>[4]</sup>**

Followed the general procedure (Irradiation was conducted for 14 h, followed by the enzyme-catalyzed reaction for 36 h). 68 mg, 70% yield, yellow oil. **Diastereomeric ratio (dr):** 82:18. **Enantiomeric ratio (er):** 79:21 (*syn*), 63:37 (*anti*).  $R_f = 0.40$  (Petroleum ether/EtOAc, v/v, 3:1). Mixture of two diastereomers:  **$^1\text{H}$  NMR (600 MHz,  $\text{CDCl}_3$ ):**  $\delta$  8.13 (d,  $J = 8.6$  Hz, 2H), 7.58 – 7.53 (m, 2H), 7.07 (t,  $J = 7.8$  Hz, 2H), 6.70 – 6.64 (m, 1H), 6.50 (d,  $J = 7.9$  Hz, 2H), 4.85 (d,  $J = 4.5$  Hz, 0.82H), 4.84 – 4.43 (m, 1.18H), 2.89 – 2.80 (m, 1H), 2.46 – 2.38 (m, 1H), 2.36 – 2.29 (m, 1H), 2.11 – 2.01 (m, 2H), 1.96 – 1.88 (m, 1H), 1.68 – 1.56 (m, 3H).  **$^{13}\text{C}$  NMR (151 MHz,  $\text{CDCl}_3$ ):**  $\delta$  211.6, 210.5, 149.9, 149.6, 147.2, 147.1, 146.7  $\times 2$  (146.74, 146.69), 129.3, 129.2, 128.6, 128.3, 123.6  $\times 2$  (123.64, 123.60), 118.4, 118.2, 114.1, 113.6, 57.9, 57.3, 57.0, 56.2, 42.4  $\times 2$  (42.42, 42.37), 32.0, 29.2, 27.7, 27.0, 24.9, 24.5. **HPLC:** Daicel Chiralpak AD-H, hexane/isopropanol = 80:20, flow rate 1.0 mL/min,  $\lambda = 254$  nm, retention time: 16.266 min (*syn* major enantiomer), 12.402 min (*syn* minor enantiomer), 14.366 min (*anti* major enantiomer), 10.040 min (*anti* minor enantiomer).

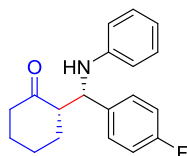

**(S)-2-((S)-(4-Fluorophenyl)(phenylamino)methyl)cyclohexan-1-one (3c)<sup>[5]</sup>**

Followed the general procedure (Irradiation was conducted for 12 h, followed by the enzyme-catalyzed reaction for 36 h). 71 mg, 80% yield, yellow oil. **Diastereomeric ratio (dr):** 59:41.

**Enantiomeric ratio (er):** 74:26 (*syn*), 54:46 (*anti*).  $R_f = 0.40$  (Petroleum ether/EtOAc, v/v, 3:1). Mixture of two diastereomers:  **$^1\text{H NMR}$  (600 MHz,  $\text{CDCl}_3$ ):**  $\delta$  7.36 – 7.29 (m, 2H), 7.10 – 7.04 (m, 2H), 7.00 – 6.93 (m, 2H), 6.67 – 6.61 (m, 1H), 6.54 – 6.49 (m, 2H), 4.74 (d,  $J = 4.4$  Hz, 0.59H), 4.60 (d,  $J = 6.7$  Hz, 0.41H), 2.83 – 2.69 (m, 1H), 2.44 – 2.36 (m, 1H), 2.35 – 2.25 (m, 1H), 2.08 – 1.91 (m, 2H), 1.90 – 1.86 (m, 1H), 1.70 – 1.55 (m, 3H).  **$^{13}\text{C NMR}$  (151 MHz,  $\text{CDCl}_3$ ):**  $\delta$  212.2, 211.2, 161.9  $\times 2$  [161.91 (d,  $J = 245.5$  Hz), 161.86 (d,  $J = 245.2$  Hz)], 147.2, 147.0, 137.4, 137.2 (d,  $J = 2.8$  Hz), 129.2 (d,  $J = 7.9$  Hz), 129.1, 129.0, 128.8 (d,  $J = 7.9$  Hz), 117.9, 117.8, 115.3 (d,  $J = 21.3$  Hz), 115.2 (d,  $J = 21.3$  Hz), 114.1, 113.8, 57.6, 57.4, 57.0, 56.5, 42.4, 41.9, 31.4, 29.0, 27.8, 27.0, 24.8, 23.9.  **$^{19}\text{F NMR}$  (565 MHz,  $\text{CDCl}_3$ )**  $\delta$  -115.61, -115.9. **HRMS (ESI):** Calculated for  $\text{C}_{19}\text{H}_{21}\text{FNO}$  ( $[\text{M}+\text{H}]^+$ ): 298.1602, Found: 298.1599; Calculated for  $\text{C}_{19}\text{H}_{20}\text{FNNaO}$  ( $[\text{M}+\text{H}]^+$ ): 320.1421, Found: 320.1421. **HPLC:** Daicel Chiralpak AD-H, hexane/isopropanol = 90:10, flow rate 1.0 mL/min,  $\lambda = 254$  nm, retention time: 12.195 min (*syn* major enantiomer), 9.106 min (*syn* minor enantiomer), 10.032 min (*anti* major enantiomer), 7.802 min (*anti* minor enantiomer).

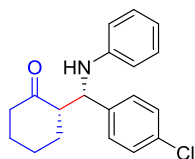

**(S)-2-((S)-(4-Chlorophenyl)(phenylamino)methyl)cyclohexan-1-one (3d)**<sup>[5]</sup>

Followed the general procedure (Irradiation was conducted for 12 h, followed by the enzyme-catalyzed reaction for 36 h). 67 mg, 71% yield, yellow oil. **Diastereomeric ratio (dr):** 68:32. **Enantiomeric ratio (er):** 77:23 (*syn*), 56:44 (*anti*).  $R_f = 0.30$  (Petroleum ether/EtOAc, v/v, 3:1). Mixture of two diastereomers:  **$^1\text{H NMR}$  (600 MHz,  $\text{CDCl}_3$ ):**  $\delta$  7.33 – 7.28 (m, 2H), 7.27 – 7.23 (m, 3H), 7.09 – 7.04 (m, 2H), 6.68 – 6.63 (m, 1H), 6.54 – 6.48 (m, 2H), 4.73 (d,  $J = 4.4$  Hz, 0.68H), 4.59 (d,  $J = 6.4$  Hz, 0.32H), 4.44 (br s, 1H), 2.80 – 2.75 (m, 0.68H), 2.75 – 2.70 (m, 0.32H), 2.44 – 2.38 (m, 1H), 2.34 – 2.27 (m, 1H), 2.06 – 2.01 (m, 1H), 1.91 – 1.88 (m, 1H), 1.70 – 1.55 (m, 4H).  **$^{13}\text{C NMR}$  (151 MHz,  $\text{CDCl}_3$ ):**  $\delta$  212.1, 211.0, 147.1, 147.0, 140.4, 140.0, 132.8, 132.7, 129.1  $\times 2$  (129.11, 129.06), 129.0, 128.7, 128.6, 128.5, 118.0, 117.8, 114.1, 113.7, 57.6, 57.3, 57.1, 56.4, 42.4, 42.0, 31.4, 29.0, 27.8, 27.0, 24.9, 24.0. **HPLC:** Daicel Chiralpak AD-H, hexane/isopropanol = 95:5, flow rate 1.0 mL/min,  $\lambda = 254$  nm, retention time: 16.850 min (*syn* major enantiomer), 12.786 min (*syn* minor enantiomer), 13.784 min (*anti* major enantiomer), 10.609 min (*anti* minor enantiomer).



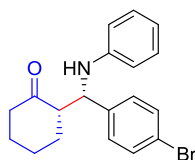

**(S)-2-((S)-(4-Bromophenyl)(phenylamino)methyl)cyclohexan-1-one (3e)**<sup>[5]</sup>

Followed the general procedure (Irradiation was conducted for 12 h, followed by the enzyme-catalyzed reaction for 36 h). 79 mg, 74% yield, yellow oil. **Diastereomeric ratio (dr):** 77:23. **Enantiomeric ratio (er):** 79:21 (*syn*), 59:41 (*anti*).  $R_f = 0.35$  (Petroleum ether/EtOAc, v/v, 3:1). Mixture of two diastereomers: **<sup>1</sup>H NMR (600 MHz, CDCl<sub>3</sub>):**  $\delta$  7.46 – 7.42 (m, 1.77H), 7.36 – 7.32 (m, 0.23H), 7.31 – 7.25 (m, 2H), 7.11 (t,  $J = 7.7$  Hz, 2H), 6.69 (t,  $J = 7.2$  Hz, 1H), 6.55 (d,  $J = 8.0$  Hz, 2H), 4.75 (d,  $J = 4.3$  Hz, 0.77H), 4.61 (d,  $J = 6.5$  Hz, 0.23H), 2.87 – 2.76 (m, 1H), 2.47 – 2.42 (m, 1H), 2.39 – 2.30 (m, 1H), 2.16 – 1.98 (m, 2H), 1.95 – 1.91 (m, 1H), 1.73 – 1.57 (m, 3H). **<sup>13</sup>C NMR (151 MHz, CDCl<sub>3</sub>):**  $\delta$  212.2, 211.0, 147.1, 147.0, 140.6, 140.1, 131.6, 131.5, 129.4, 129.1  $\times$  3 (129.14, 129.12, 129.07), 121.0, 120.8, 118.0  $\times$  2 (118.02, 117.98), 114.1, 113.8, 57.2, 57.1, 56.4, 56.3, 42.4, 42.0, 31.5, 29.0, 27.8, 27.0, 24.9, 24.0. **HRMS (ESI):** Calculated for C<sub>19</sub>H<sub>21</sub>BrNO ([M+H]<sup>+</sup>): 358.0801, Found: 358.0800. **HPLC:** Daicel Chiralpak AD-H, hexane/isopropanol = 95:5, flow rate 1.0 mL/min,  $\lambda = 254$  nm, retention time: 18.493 min (*syn* major enantiomer), 14.385 min (*syn* minor enantiomer), 15.282 min (*anti* major enantiomer), 12.267 min (*anti* minor enantiomer).

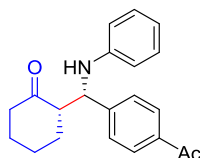

**(S)-2-((S)-(4-Acetylphenyl)(phenylamino)methyl)cyclohexan-1-one (3f)**

Followed the general procedure (Irradiation was conducted for 12 h, followed by the enzyme-catalyzed reaction for 36 h). 64 mg, 66% yield, yellow oil. **Diastereomeric ratio (dr):** 82:18. **Enantiomeric ratio (er):** 81:19 (*syn*), 55:45 (*anti*).  $R_f = 0.30$  (Petroleum ether/EtOAc, v/v, 3:1). Mixture of two diastereomers: **<sup>1</sup>H NMR (600 MHz, CDCl<sub>3</sub>):**  $\delta$  7.81 (d,  $J = 8.1$  Hz, 2H), 7.42 – 7.37 (m, 2H), 6.99 (t,  $J = 7.8$  Hz, 2H), 6.58 (t,  $J = 7.4$  Hz, 1H), 6.47 – 6.42 (m, 2H), 4.76 (d,  $J = 4.4$  Hz, 0.88H), 4.70 – 4.35 (m, 1.12H), 2.77 – 2.72 (m, 1H), 2.48 (s, 3H), 2.37 – 2.32 (m, 1H), 2.27 – 2.20 (m, 1H), 2.02 – 1.94 (m, 2H), 1.86 – 1.80 (m, 1H), 1.60 – 1.50 (m, 3H). **<sup>13</sup>C NMR (151 MHz, CDCl<sub>3</sub>):**  $\delta$  211.0, 209.8, 146.6, 146.4, 146.1, 146.0, 135.2  $\times$  2 (135.24, 135.20), 128.2, 128.1, 127.6, 127.5, 126.9, 126.6, 117.1, 116.9, 113.1, 112.6, 57.0, 56.4, 56.2, 55.3, 41.4, 41.1, 30.7, 28.0, 26.8,

26.0, 25.5, 25.0, 23.9, 23.1. **HRMS (ESI)**: Calculated for C<sub>21</sub>H<sub>24</sub>NO<sub>2</sub> ([M+H]<sup>+</sup>): 322.1802, Found: 322.1801; Calculated for C<sub>21</sub>H<sub>23</sub>NNaO<sub>2</sub> ([M+Na]<sup>+</sup>): 344.1621, Found: 344.1622. **HPLC**: Daicel Chiralpak OD-H, hexane/isopropanol = 80:20, flow rate 0.3 mL/min, λ = 254 nm, retention time: 41.069 min (*syn* major enantiomer), 69.795 min (*syn* minor enantiomer), 44.412 min (*anti* major enantiomer), 39.701 min (*anti* minor enantiomer).

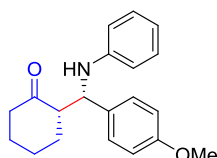

**(S)-2-((S)-(4-Methoxyphenyl)(phenylamino)methyl)cyclohexan-1-one (3g)**<sup>[6]</sup>

Followed the general procedure (Irradiation was conducted for 12 h, followed by the enzyme-catalyzed reaction for 38 h). 62 mg, 67% yield, yellow oil. **Diastereomeric ratio (dr)**: 70:30. **Enantiomeric ratio (er)**: 76:24 (*syn*), 61:39 (*anti*).  $R_f$  = 0.40 (Petroleum ether/EtOAc, v/v, 5:1). Mixture of two diastereomers: **<sup>1</sup>H NMR (600 MHz, CDCl<sub>3</sub>)**: δ 7.30 – 7.22 (m, 3H), 7.09 – 7.02 (m, 2H), 6.82 (t,  $J$  = 8.6 Hz, 2H), 6.66 – 6.60 (m, 1H), 6.58 – 6.51 (m, 2H), 4.71 (d,  $J$  = 4.4 Hz, 0.70H), 4.58 (d,  $J$  = 7.1 Hz, 0.30H), 3.75 (s, 3H), 2.81 – 2.68 (m, 1H), 2.45 – 2.36 (m, 1H), 2.34 – 2.25 (m, 1H), 2.07 – 1.98 (m, 1H), 1.93 – 1.80 (m, 2H), 1.70 – 1.55 (m, 3H). **<sup>13</sup>C NMR (151 MHz, CDCl<sub>3</sub>)**: δ 212.8, 211.5, 158.8, 158.6, 147.5, 147.2, 133.6, 133.5, 129.0 × 2 (129.03, 128.99), 128.6, 128.3, 117.6, 114.4, 114.1, 113.9 × 2 (113.93, 113.87), 113.8, 57.6 × 2 (57.61, 57.56), 57.0, 56.6, 55.2 × 2 (55.20, 55.18), 42.4, 41.7, 31.1, 29.0, 27.8, 27.0, 24.8, 23.6. **HPLC**: Daicel Chiralpak AS-H, hexane/isopropanol = 90:10, flow rate 1.0 mL/min, λ = 254 nm, retention time: 20.391 min (*syn* major enantiomer), 14.239 min (*syn* minor enantiomer), 10.020 min (*anti* major enantiomer), 16.801 min (*anti* minor enantiomer).

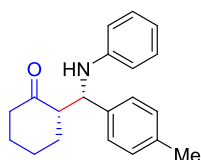

**(S)-2-((S)-(Phenylamino)(p-tolyl)methyl)cyclohexan-1-one (3h)**<sup>[6]</sup>

Followed the general procedure (Irradiation was conducted for 12 h, followed by the enzyme-catalyzed reaction for 35 h). 56 mg, 64% yield, yellow oil. **Diastereomeric ratio (dr)**: 63:37. **Enantiomeric ratio (er)**: 79:21 (*syn*), 63:37 (*anti*).  $R_f$  = 0.50 (Petroleum ether/EtOAc, v/v, 5:1). Mixture of two diastereomers: **<sup>1</sup>H NMR (400 MHz, CDCl<sub>3</sub>)**: δ 7.26 – 7.19 (m, 2H), 7.11 – 7.01 (m,

4H), 6.66 – 6.57 (m, 1H), 6.53 (t,  $J = 7.4$  Hz, 2H), 4.75 (d,  $J = 4.5$  Hz, 0.63H), 4.59 (d,  $J = 7.2$  Hz, 0.37H), 2.80 – 2.69 (m, 1H), 2.43 – 2.33 (m, 2H), 2.28 (s, 3H), 2.03 – 1.95 (m, 1H), 1.90 – 1.82 (m, 2H), 1.71 – 1.56 (m, 3H).  $^{13}\text{C NMR}$  (101 MHz,  $\text{CDCl}_3$ ):  $\delta$  212.9, 211.4, 147.6, 147.3, 138.6, 138.5, 136.7, 136.5, 129.2, 129.1  $\times$  2 (129.08, 129.05), 129.0, 127.4, 127.2, 117.6  $\times$  2 (117.63, 117.55), 114.1, 113.8, 57.8, 57.5, 57.1, 56.6, 42.4, 41.7, 31.2, 28.8, 27.9, 27.0, 24.8, 23.6, 21.4, 21.0. **HPLC**: Daicel Chiralpak OJ-H, hexane/isopropanol = 97:03, flow rate 1.0 mL/min,  $\lambda = 254$  nm, retention time: 37.645 min (*syn* major enantiomer), 33.056 min (*syn* minor enantiomer), 27.180 min (*anti* major enantiomer), 20.670 min (*anti* minor enantiomer).

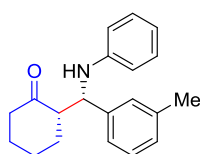

**(S)-2-((S)-(Phenylamino)(*m*-tolyl)methyl)cyclohexan-1-one (3i)**<sup>[7]</sup>

Followed the general procedure (Irradiation was conducted for 12 h, followed by the enzyme-catalyzed reaction for 35 h). 55 mg, 62% yield, yellow oil. **Diastereomeric ratio (dr)**: 71:29. **Enantiomeric ratio (er)**: 77:23 (*syn*), 57:43 (*anti*).  $R_f = 0.40$  (Petroleum ether/EtOAc, v/v, 5:1). Mixture of two diastereomers:  $^1\text{H NMR}$  (400 MHz,  $\text{CDCl}_3$ ):  $\delta$  7.18 – 7.11 (m, 3H), 7.10 – 7.03 (m, 2H), 7.00 (d,  $J = 6.9$  Hz, 1H), 6.66 – 6.59 (m, 1H), 6.58 – 6.51 (m, 2H), 4.77 (d,  $J = 4.4$  Hz, 0.71H), 4.57 (d,  $J = 7.2$  Hz, 0.29H), 2.81 – 2.70 (m, 1H), 2.44 – 2.33 (m, 2H), 2.31 (s, 3H), 2.03 – 1.96 (m, 1H), 1.91 – 1.80 (m, 2H), 1.71 – 1.56 (m, 3H).  $^{13}\text{C NMR}$  (101 MHz,  $\text{CDCl}_3$ ):  $\delta$  212.9, 211.3, 147.6, 147.2, 141.7  $\times$  2 (141.74, 141.66), 138.1, 138.0, 129.1, 129.0, 128.3, 128.2, 128.1, 128.0, 127.9, 127.8, 124.6, 124.5, 117.6  $\times$  2 (117.64, 117.59), 114.1, 113.7, 58.2, 57.5, 57.2, 56.7, 42.4, 41.7, 31.3, 28.6, 27.9, 27.0, 25.0, 24.8, 23.6, 21.6. **HPLC**: Daicel Chiralpak OJ-H, hexane/isopropanol = 97:03, flow rate 1.0 mL/min,  $\lambda = 254$  nm, retention time: 36.776 min (*syn* major enantiomer), 32.200 min (*syn* minor enantiomer), 23.964 min (*anti* major enantiomer), 19.814 min (*anti* minor enantiomer).

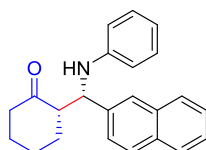

**(S)-2-((S)-Naphthalen-2-yl(phenylamino)methyl)cyclohexan-1-one (3j)**<sup>[8]</sup>

Followed the general procedure (Irradiation was conducted for 12 h, followed by the enzyme-catalyzed reaction for 38 h). 63 mg, 64% yield, yellow oil. **Diastereomeric ratio (dr)**: 78:22. **Enantiomeric ratio (er)**: 83:17 (*syn*), 59:41 (*anti*).  $R_f = 0.40$  (Petroleum ether/EtOAc, v/v, 5:1). Mixture of two diastereomers:  **$^1\text{H NMR}$  (600 MHz,  $\text{CDCl}_3$ )**:  $\delta$  7.83 – 7.75 (m, 4H), 7.51 – 7.47 (m, 1H), 7.46 – 7.39 (m, 2H), 7.10 – 7.00 (m, 2H), 6.65 – 6.55 (m, 3H), 4.96 (d,  $J = 4.1$  Hz, 0.78H), 4.79 (d,  $J = 7.1$  Hz, 0.22H), 2.91 – 2.79 (m, 1H), 2.46 – 2.38 (m, 1H), 2.34 – 2.26 (m, 1H), 2.10 – 1.83 (m, 3H), 1.69 – 1.59 (m, 2H), 1.59 – 1.51 (m, 1H).  **$^{13}\text{C NMR}$  (151 MHz,  $\text{CDCl}_3$ )**:  $\delta$  212.6, 211.2, 147.6, 147.3, 139.3, 139.2, 133.4, 133.3, 132.9, 132.8, 129.1, 129.0, 128.4, 128.1, 128.0  $\times$  2 (128.00, 127.91), 127.7, 127.6, 126.4  $\times$  2 (126.42, 126.35), 126.1, 126.0, 125.8, 125.7, 125.6, 125.2, 117.8, 117.7, 114.2, 113.8, 58.4, 57.6, 57.5, 56.6, 42.4, 41.8, 31.3, 28.8, 27.8, 27.0, 24.8, 23.7. **HPLC**: Daicel Chiralpak AS-H, hexane/isopropanol = 90:10, flow rate 1.0 mL/min,  $\lambda = 254$  nm, retention time: 19.775 min (*syn* major enantiomer), 12.736 min (*syn* minor enantiomer), 7.440 min (*anti* major enantiomer), 14.469 min (*anti* minor enantiomer).

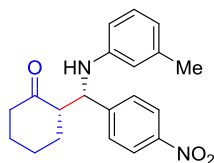

**(S)-2-((S)-(4-Nitrophenyl)(*m*-tolylamino)methyl)cyclohexan-1-one (3k)<sup>[9]</sup>**

Followed the general procedure (Irradiation was conducted for 12 h, followed by the enzyme-catalyzed reaction for 38 h). 71 mg, 70% yield, white solid. **Diastereomeric ratio (dr)**: 87:13. **Enantiomeric ratio (er)**: 82:18 (*syn*), 64:36 (*anti*).  $R_f = 0.40$  (Petroleum ether/EtOAc, v/v, 5:1). Mixture of two diastereomers:  **$^1\text{H NMR}$  (600 MHz,  $\text{CDCl}_3$ )**:  $\delta$  8.20 (d,  $J = 8.4$  Hz, 0.26H), 8.14 (d,  $J = 8.4$  Hz, 1.74H), 7.55 (d,  $J = 8.5$  Hz, 1.74H), 7.48 (d,  $J = 8.5$  Hz, 0.26H), 6.96 (t,  $J = 7.7$  Hz, 1H), 6.53 – 6.47 (m, 1H), 6.36 (s, 1H), 6.28 (d,  $J = 7.9$  Hz, 1H), 4.85 (d,  $J = 4.4$  Hz, 0.87H), 4.71 (d,  $J = 5.2$  Hz, 0.13H), 4.56 (s, 1H), 2.87 – 2.80 (m, 1H), 2.43 (d,  $J = 14.2$  Hz, 1H), 2.36 – 2.28 (m, 1H), 2.19 (s, 3H), 2.10 – 2.03 (m, 2H), 1.93 (d,  $J = 6.9$  Hz, 1H), 1.67 – 1.56 (m, 3H).  **$^{13}\text{C NMR}$  (151 MHz,  $\text{CDCl}_3$ )**:  $\delta$  211.6, 210.5, 150.0, 149.7, 147.1, 146.7, 139.1, 139.0, 129.1, 129.0, 128.6, 128.2, 126.6, 123.6  $\times$  2 (123.63, 123.58), 123.4, 119.4, 119.1, 115.0, 114.5, 111.0, 110.5, 57.8, 57.3, 56.8, 56.2, 42.4, 42.3, 31.9, 29.2, 27.0, 25.9, 24.9, 24.8, 24.5, 21.5. **HPLC**: Daicel Chiralpak AD-H, hexane/isopropanol = 85:15, flow rate 1.0 mL/min,  $\lambda = 254$  nm, retention time: 20.875 min (*syn*

major enantiomer), 16.896 min (*syn* minor enantiomer), 15.288 min (*anti* major enantiomer), 13.003 min (*anti* minor enantiomer).

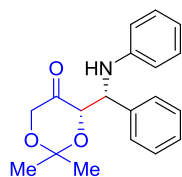

**(S)-2,2-Dimethyl-4-((R)-phenyl(phenylamino)methyl)-1,3-dioxan-5-one (31)**

Followed the general procedure (Irradiation was conducted for 12 h, followed by the enzyme-catalyzed reaction for 40 h). 73 mg, 78% yield, white solid. **Diastereomeric ratio (dr):** 93:7. **Enantiomeric ratio (er):** 79:21 (*syn*), 74:26 (*anti*).  $R_f = 0.20$  (Petroleum ether/EtOAc, v/v, 5:1). Mixture of two diastereomers:  **$^1\text{H NMR}$  (600 MHz,  $\text{CDCl}_3$ ):**  $\delta$  7.36 (d,  $J = 7.5$  Hz, 2H), 7.28 (t,  $J = 7.6$  Hz, 2H), 7.24 – 7.20 (m, 1H), 7.12 – 7.05 (m, 2H), 6.69 – 6.62 (m, 1H), 6.59 (d,  $J = 8.3$  Hz, 2H), 5.10 (s, 0.93H), 5.0 (d,  $J = 3.2$  Hz, 0.07H), 4.98 – 4.60 (m, 1.07H), 4.49 (s, 0.93H), 4.41 (d,  $J = 23.0$  Hz, 0.07H), 4.26 (d,  $J = 17.0$  Hz, 0.93H), 4.05 (d,  $J = 17.0$  Hz, 0.93H), 3.82 (d,  $J = 8.6$  Hz, 0.07H), 1.52 (s, 2.79H), 1.45 (s, 0.21H), 1.42 (s, 0.21H), 1.32 (s, 2.79H).  **$^{13}\text{C NMR}$  (151 MHz,  $\text{CDCl}_3$ ):**  $\delta$  206.9  $\times$  2 (206.91, 206.86), 146.9, 146.4, 139.74, 137.9, 129.2  $\times$  2 (129.21, 129.15), 128.8, 128.4, 128.0, 127.6, 127.4, 127.1, 118.3, 118.0, 114.3, 114.1, 100.8, 100.7, 79.4, 77.8, 67.4, 67.1, 57.1, 56.3, 24.9, 24.6, 23.4, 22.9. **HRMS (ESI):** Calculated for  $\text{C}_{19}\text{H}_{22}\text{NO}_3$  ( $[\text{M}+\text{H}]^+$ ): 312.1594, Found: 312.1593; Calculated for  $\text{C}_{19}\text{H}_{21}\text{NNaO}_3$  ( $[\text{M}+\text{Na}]^+$ ): 334.1414, Found: 334.1412; Calculated for  $\text{C}_{19}\text{H}_{21}\text{KNO}_3$  ( $[\text{M}+\text{K}]^+$ ): 350.1153, Found: 350.1151. **HPLC:** Daicel Chiralpak OJ-H, hexane/isopropanol = 80:20, flow rate 0.75 mL/min,  $\lambda = 254$  nm, retention time: 11.489 min (*syn* major enantiomer), 15.486 min (*syn* minor enantiomer), 13.604 min (*anti* major enantiomer), 7.094 min (*anti* minor enantiomer).

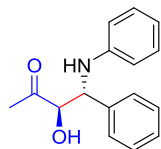

**(3R,4R)-3-Hydroxy-4-phenyl-4-(phenylamino)butan-2-one (5a)<sup>[10]</sup>**

Followed the general procedure (Irradiation was conducted for 12 h, followed by the enzyme-catalyzed reaction for 40 h). 62 mg, 81% yield, yellow oil. **Diastereomeric ratio (dr):** 76:24. **Enantiomeric ratio (er):** 88:12 (*anti*), 62:38 (*syn*).  $R_f = 0.25$  (Petroleum ether/EtOAc, v/v, 5:1).  **$^1\text{H}$**

**NMR (600 MHz, CDCl<sub>3</sub>):**  $\delta$  7.38 – 7.30 (m, 1H), 7.30 – 7.21 (m, 4H), 7.12 – 7.05 (m, 2H), 6.70 – 6.64 (m, 1H), 6.59 (d,  $J = 7.9$  Hz, 1.52H), 6.53 (d,  $J = 7.9$  Hz, 0.48H), 4.95 (s, 0.24H), 4.85 (d,  $J = 3.0$  Hz, 0.76H), 4.66 (d,  $J = 2.9$  Hz, 0.76H), 4.42 (s, 0.24H), 3.47 (br s, 1H), 2.28 (s, 0.72H), 2.13 (s, 2.28H). **<sup>13</sup>C NMR (151 MHz, CDCl<sub>3</sub>):**  $\delta$  207.4, 207.3, 146.4, 146.2, 139.3, 137.3, 129.3, 129.2, 128.7, 128.6, 128.1, 127.6, 127.4, 127.0, 118.3, 118.2, 114.1, 113.9, 80.8, 79.9, 59.6, 58.4, 26.8, 25.2. **HPLC:** Daicel Chiralpak AD-H, hexane/isopropanol = 80:20, flow rate 0.5 mL/min,  $\lambda = 254$  nm, retention time: 15.333 min (*anti* major enantiomer), 15.046 min (*anti* minor enantiomer), 19.149 min (*syn* major enantiomer), 12.700 min (*syn* minor enantiomer).

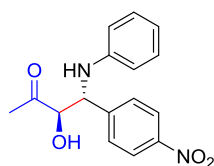

**(3R,4R)-3-Hydroxy-4-(4-nitrophenyl)-4-(phenylamino)butan-2-one (5b)<sup>[11]</sup>**

Followed the general procedure (Irradiation was conducted for 12 h, followed by the enzyme-catalyzed reaction for 28 h). 62 mg, 69% yield, yellow oil. **Diastereomeric ratio (dr):** 86:14. **Enantiomeric ratio (er):** 87:13 (*anti*), 65:35 (*syn*).  $R_f = 0.20$  (Petroleum ether/EtOAc, v/v, 5:1). **<sup>1</sup>H NMR (600 MHz, CDCl<sub>3</sub>):**  $\delta$  8.19 (d,  $J = 9.0$  Hz, 0.28H), 8.13 (d,  $J = 8.6$  Hz, 1.72H), 7.56 (d,  $J = 8.5$  Hz, 0.28H), 7.48 (d,  $J = 8.6$  Hz, 1.72H), 7.14 – 7.07 (m, 2H), 6.71 (t,  $J = 7.0$  Hz, 1H), 6.56 (d,  $J = 7.8$  Hz, 1.72H), 6.50 (d,  $J = 7.9$  Hz, 0.28H), 5.08 (s, 0.14H), 4.96 (d,  $J = 2.7$  Hz, 0.86H), 4.84 (br s, 0.86H), 4.73 (s, 0.86H), 4.55 (br s, 0.14H), 4.45 (s, 0.14H), 3.53 (s, 0.86H), 2.36 (s, 0.42H), 2.25 (s, 2.58H). **<sup>13</sup>C NMR (151 MHz, CDCl<sub>3</sub>):**  $\delta$  206.3, 206.2, 147.8, 147.6, 147.1, 145.5, 145.3, 145.0, 129.4  $\times$  2 (129.45, 129.40), 128.5, 128.0, 123.9, 123.7, 118.9  $\times$  2 (118.92, 118.90), 114.0, 113.8, 80.0, 79.6, 59.2, 58.0, 26.6, 24.9. **HPLC:** Daicel Chiralpak AD-H, hexane/isopropanol = 90:10, flow rate 1.0 mL/min,  $\lambda = 254$  nm, retention time: 34.336 min (*anti* major enantiomer), 23.332 min (*anti* minor enantiomer), 42.833 min (*syn* major enantiomer), 36.393 min (*syn* minor enantiomer).

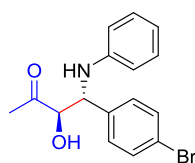

**(3R,4R)-4-(4-Bromophenyl)-3-hydroxy-4-(phenylamino)butan-2-one (5c)**

Followed the general procedure (Irradiation was conducted for 12 h, followed by the enzyme-catalyzed reaction for 28 h). 73 mg, 73% yield, yellow oil. **Diastereomeric ratio (dr)**: 82:18. **Enantiomeric ratio (er)**: 88:12 (*anti*), 61:39 (*syn*).  $R_f = 0.25$  (Petroleum ether/EtOAc, v/v, 5:1).  **$^1\text{H}$  NMR (400 MHz,  $\text{CDCl}_3$ )**:  $\delta$  7.46 – 7.44 (m, 0.36H), 7.42 – 7.38 (m, 1.64H), 7.26 – 7.23 (m, 0.36H), 7.16 (d,  $J = 8.4$  Hz, 1.64H), 7.13 – 7.06 (m, 2H), 6.72 – 6.65 (m, 1H), 6.58 – 6.54 (m, 1.64H), 6.52 – 6.48 (m, 0.36H), 4.92 (d,  $J = 2.1$  Hz, 0.18H), 4.81 (d,  $J = 3.3$  Hz, 0.82H), 4.64 (d,  $J = 3.3$  Hz, 0.82H), 4.38 (d,  $J = 2.0$  Hz, 0.18H), 2.30 (s, 0.54H), 2.17 (s, 2.46H).  **$^{13}\text{C}$  NMR (101 MHz,  $\text{CDCl}_3$ )**:  $\delta$  207.0, 206.9, 146.0, 145.7, 138.4, 136.4, 131.8  $\times$  2 (131.84, 131.77), 129.3  $\times$  2 (129.33, 129.30), 129.2, 128.8, 122.1, 121.6, 118.5  $\times$  2 (118.51, 118.47), 114.0, 113.8, 80.4, 79.7, 59.0, 57.8, 26.7, 25.1. **HRMS (ESI)**: Calculated for  $\text{C}_{16}\text{H}_{17}\text{BrNO}_2$  ( $[\text{M}+\text{H}]^+$ ): 334.0437, Found: 334.0436. **HPLC**: Daicel Chiralpak AD-H, hexane/isopropanol = 90:10, flow rate 1.0 mL/min,  $\lambda = 254$  nm, retention time: 16.871 min (*anti* major enantiomer), 11.811 min (*anti* minor enantiomer), 17.868 min (*syn* major enantiomer), 11.988 min (*syn* minor enantiomer).

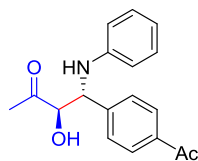

**(3R,4R)-4-(4-Acetylphenyl)-3-hydroxy-4-(phenylamino)butan-2-one (5d)**

Followed the general procedure (Irradiation was conducted for 12 h, followed by the enzyme-catalyzed reaction for 28 h). 66 mg, 74% yield, yellow oil. **Diastereomeric ratio (dr)**: 85:15. **Enantiomeric ratio (er)**: 88:12 (*anti*), 60:40 (*syn*).  $R_f = 0.20$  (Petroleum ether/EtOAc, v/v, 5:1).  **$^1\text{H}$  NMR (600 MHz,  $\text{CDCl}_3$ )**:  $\delta$  7.92 (d,  $J = 8.2$  Hz, 0.30H), 7.86 (d,  $J = 8.2$  Hz, 1.70H), 7.47 (d,  $J = 8.1$  Hz, 0.30H), 7.40 (d,  $J = 8.1$  Hz, 1.70H), 7.12 – 7.06 (m, 2H), 6.71 – 6.66 (m, 1H), 6.57 (d,  $J = 8.3$  Hz, 1.70H), 6.52 (d,  $J = 8.0$  Hz, 0.30H), 5.03 (s, 0.15H), 4.91 (d,  $J = 2.8$  Hz, 0.85H), 4.70 (s, 0.85H), 4.45 (s, 0.15H), 3.90 (s, 0.15H), 3.59 (s, 0.85H), 2.55 – 2.51 (m, 3H), 2.34 (s, 0.45H), 2.19 (s, 2.55H).  **$^{13}\text{C}$  NMR (151 MHz,  $\text{CDCl}_3$ )**:  $\delta$  207.0, 206.8, 197.6, 197.5, 146.0, 145.8, 145.0, 142.9, 136.9, 136.6, 129.3  $\times$  2 (129.33, 129.29), 128.8, 128.6, 127.8, 127.3, 118.6, 118.5, 114.0, 113.8, 80.3, 79.7, 59.4, 58.2, 26.7, 26.5  $\times$  2 (26.51, 26.48), 25.1. **HRMS (ESI)**: Calculated for  $\text{C}_{18}\text{H}_{20}\text{NO}_3$  ( $[\text{M}+\text{H}]^+$ ): 298.1438, Found: 298.1437. **HPLC**: Daicel Chiralpak AD-H, hexane/isopropanol = 90:10, flow rate 1.0 mL/min,  $\lambda = 254$  nm, retention time: 32.234 min (*anti* major enantiomer),

27.494 min (*anti* minor enantiomer), 44.333 min (*syn* major enantiomer), 29.170 min (*syn* minor enantiomer).

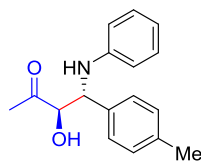

**(3R,4R)-3-Hydroxy-4-(phenylamino)-4-(p-tolyl)butan-2-one (5e)**

Followed the general procedure (Irradiation was conducted for 18 h, followed by the enzyme-catalyzed reaction for 30 h). 67 mg, 83% yield, yellow oil. **Diastereomeric ratio (dr):** 77:23. **Enantiomeric ratio (er):** 82:18 (*anti*), 57:43 (*syn*).  $R_f = 0.30$  (Petroleum ether/EtOAc, v/v, 3:1).  **$^1\text{H}$  NMR (600 MHz,  $\text{CDCl}_3$ ):**  $\delta$  7.23 (d,  $J = 7.7$  Hz, 0.46H), 7.15 (d,  $J = 7.7$  Hz, 1.54H), 7.13 – 7.03 (m, 4H), 6.68 – 6.62 (m, 1H), 6.60 – 6.50 (m, 2H), 4.91 (s, 0.23H), 4.80 (d,  $J = 2.5$  Hz, 0.77H), 4.61 (d,  $J = 2.7$  Hz, 0.77H), 4.37 (s, 0.23H), 3.52 (br s, 1H), 2.28 (s, 0.69H), 2.27 - 2.23 (m, 3H), 2.10 (s, 2.31H).  **$^{13}\text{C}$  NMR (151 MHz,  $\text{CDCl}_3$ ):**  $\delta$  207.6, 207.5, 146.5, 146.4, 137.8, 137.3, 136.3, 134.2, 129.5, 129.4, 129.3, 129.2, 127.3, 126.9, 118.2, 118.1, 114.1, 113.9, 80.9, 79.9, 59.3, 58.2, 26.8, 25.3, 21.1, 21.1. **HRMS (ESI):** Calculated for  $\text{C}_{17}\text{H}_{20}\text{NO}_2$  ( $[\text{M}+\text{H}]^+$ ): 270.1489, Found: 270.1492; Calculated for  $\text{C}_{17}\text{H}_{19}\text{NNaO}_2$  ( $[\text{M}+\text{Na}]^+$ ): 292.1308, Found: 292.1312. **HPLC:** Daicel Chiralpak AD-H, hexane/isopropanol = 90:10, flow rate 1.0 mL/min,  $\lambda = 254$  nm, retention time: 14.132 min (*anti* major enantiomer), 11.548 min (*anti* minor enantiomer), 16.947 min (*syn* major enantiomer), 10.399 min (*syn* minor enantiomer).

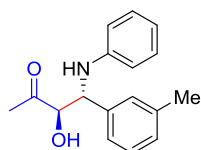

**(3R,4R)-3-Hydroxy-4-(phenylamino)-4-(m-tolyl)butan-2-one (5f)**

Followed the general procedure (Irradiation was conducted for 18 h, followed by the enzyme-catalyzed reaction for 30 h). 57 mg, 71% yield, yellow oil. **Diastereomeric ratio (dr):** 73:27. **Enantiomeric ratio (er):** 82:18 (*anti*), 52:48 (*syn*).  $R_f = 0.30$  (Petroleum ether/EtOAc, v/v, 3:1).  **$^1\text{H}$  NMR (400 MHz,  $\text{CDCl}_3$ ):**  $\delta$  7.24 – 6.98 (m, 6H), 6.77 – 6.64 (m, 1H), 6.64 – 6.48 (m, 2H), 4.90 (d,  $J = 2.4$  Hz, 0.27H), 4.79 (d,  $J = 3.6$  Hz, 0.73H), 4.62 (d,  $J = 3.6$  Hz, 0.73H), 4.39 (d,  $J = 2.4$  Hz, 0.27H), 4.30 – 3.46 (m, 2H), 2.33 – 2.25 (m, 3.81H), 2.10 (s, 2.19H).  **$^{13}\text{C}$  NMR (101 MHz,  $\text{CDCl}_3$ ):**  $\delta$  207.6, 207.2, 146.5, 146.3, 139.3,  $138.3 \times 2$  (138.34, 138.28), 137.3, 129.3, 129.2, 129.0, 128.6,



128.5, 128.0, 127.6, 124.5, 124.0, 120.9, 118.2, 118.1, 114.0, 113.8, 80.9, 79.9, 59.6, 58.3, 26.8, 25.3, 21.6, 21.5. **HRMS (ESI):** Calculated for  $C_{17}H_{20}NO_2$  ( $[M+H]^+$ ): 270.1489, Found: 270.1487; Calculated for  $C_{17}H_{19}NNaO_2$  ( $[M+Na]^+$ ): 292.1308, Found: 292.1314. **HPLC:** Daicel Chiralpak AD-H, hexane/isopropanol = 90:10, flow rate 1.0 mL/min,  $\lambda = 254$  nm, retention time: 10.920 min (*anti* major enantiomer), 12.158 min (*anti* minor enantiomer), 13.166 min (*syn* major enantiomer), 8.649 min (*syn* minor enantiomer).

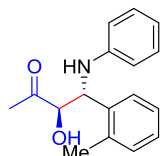

**(3R,4R)-3-Hydroxy-4-(phenylamino)-4-(o-tolyl)butan-2-one (5g)**

Followed the general procedure (Irradiation was conducted for 18 h, followed by the enzyme-catalyzed reaction for 31 h). 72 mg, 89% yield, yellow oil. **Diastereomeric ratio (dr):** 89:11. **Enantiomeric ratio (er):** 89:11 (*anti*), 57:43 (*syn*).  $R_f = 0.30$  (Petroleum ether/EtOAc, v/v, 3:1).  **$^1H$  NMR (400 MHz,  $CDCl_3$ ):**  $\delta$  7.41 (d,  $J = 7.0$  Hz, 0.89H), 7.26 (d,  $J = 7.0$  Hz, 0.11H), 7.20 – 7.01 (m, 5H), 6.72 – 6.59 (m, 1H), 6.56 – 6.50 (m, 1.78H), 6.45 – 6.41 (m, 0.22H), 5.14 (s, 0.11H), 4.98 (dd,  $J = 4.6, 2.1$  Hz, 0.89H), 4.55 (dd,  $J = 4.5, 2.2$  Hz, 0.89H), 4.28 (d,  $J = 2.0$  Hz, 0.11H), 3.77 (br s, 1H), 2.52 (d,  $J = 2.2$  Hz, 0.33H), 2.45 (d,  $J = 2.1$  Hz, 2.67H), 2.27 (d,  $J = 2.0$  Hz, 0.33H), 1.92 (d,  $J = 2.2$  Hz, 2.67H).  **$^{13}C$  NMR (101 MHz,  $CDCl_3$ ):**  $\delta$  209.6, 207.7, 146.6, 146.1, 136.9, 136.2, 135.8, 134.5, 131.1, 130.8, 129.3  $\times$  2 (129.33, 129.29), 127.9, 127.6, 126.9, 126.8, 126.6, 126.5, 118.5, 118.1, 114.0, 113.8, 78.6, 78.3, 56.6, 54.5, 27.7, 25.3, 19.5, 19.3. **HRMS (ESI):** Calculated for  $C_{17}H_{20}NO_2$  ( $[M+H]^+$ ): 270.1489, Found: 270.1486; Calculated for  $C_{17}H_{19}NNaO_2$  ( $[M+Na]^+$ ): 292.1308, Found: 292.1308. **HPLC:** Daicel Chiralpak AD-H, hexane/isopropanol = 97:3, flow rate 1.0 mL/min,  $\lambda = 254$  nm, retention time: 26.786 min (*anti* major enantiomer), 29.598 min (*anti* minor enantiomer), 52.100 min (*syn* major enantiomer), 20.597 min (*syn* minor enantiomer).

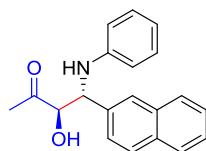

**(3R,4R)-3-Hydroxy-4-(naphthalen-2-yl)-4-(phenylamino)butan-2-one (5h)**

Followed the general procedure (Irradiation was conducted for 12 h, followed by the enzyme-catalyzed reaction for 28 h). 63 mg, 69% yield, yellow oil. **Diastereomeric ratio (dr):** 81:19.

**Enantiomeric ratio (er):** 87:13 (*anti*), 59:41 (*syn*).  $R_f = 0.65$  (Petroleum ether/EtOAc, v/v, 5:1).  **$^1\text{H}$  NMR (600 MHz,  $\text{CDCl}_3$ ):**  $\delta$  7.83 – 7.74 (m, 4H), 7.52 – 7.49 (m, 0.19H), 7.46 – 7.42 (m, 2.81H), 7.11 – 7.04 (m, 2H), 6.68 – 6.65 (m, 1H), 6.65 – 6.62 (m, 1.62H), 6.58 (d,  $J = 8.4$  Hz, 0.38H), 5.11 (s, 0.19H), 5.01 (d,  $J = 3.4$  Hz, 0.81H), 4.73 (d,  $J = 3.1$  Hz, 0.81H), 4.51 (s, 0.19H), 2.32 (s, 0.57H), 2.15 (s, 2.43H).  **$^{13}\text{C}$  NMR (151 MHz,  $\text{CDCl}_3$ ):**  $\delta$  207.2  $\times$  2 (207.22, 207.20), 146.4, 146.2, 136.9, 134.9, 133.4, 133.2  $\times$  2 (133.21, 133.20), 133.1, 129.3, 129.2, 128.6  $\times$  2 (128.63, 128.56), 128.0, 127.9, 127.7  $\times$  2 (127.709, 127.707), 126.6, 126.3, 126.2  $\times$  2 (126.23, 126.16), 126.0  $\times$  2 (126.04, 125.98), 125.1, 124.8, 118.4, 118.3, 114.1, 114.0, 80.8, 80.0, 59.9, 58.6, 26.8, 25.3. **HRMS (ESI):** Calculated for  $\text{C}_{20}\text{H}_{20}\text{NO}_2$  ( $[\text{M}+\text{H}]^+$ ): 306.1489, Found: 306.1493; Calculated for  $\text{C}_{20}\text{H}_{19}\text{NNaO}_2$  ( $[\text{M}+\text{Na}]^+$ ): 328.1308, Found: 328.1309. **HPLC:** Daicel Chiralpak OD-H, hexane/isopropanol = 90:10, flow rate 1.0 mL/min,  $\lambda = 254$  nm, retention time: 18.516 min (*anti* major enantiomer), 65.165 min (*anti* minor enantiomer), 29.210 min (*syn* major enantiomer), 32.480 min (*syn* minor enantiomer).

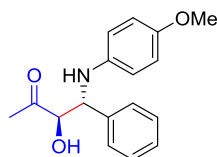

**(3*R*,4*R*)-3-Hydroxy-4-((4-methoxyphenyl)amino)-4-phenylbutan-2-one (5i)**<sup>[12]</sup>

Followed the general procedure (Irradiation was conducted for 18 h, followed by the enzyme-catalyzed reaction for 30 h). 47 mg, 55% yield, yellow oil. **Diastereomeric ratio (dr):** 75:25. **Enantiomeric ratio (er):** 83:17 (*anti*), 58:42 (*syn*).  $R_f = 0.25$  (Petroleum ether/EtOAc, v/v, 3:1).  **$^1\text{H}$  NMR (400 MHz,  $\text{CDCl}_3$ ):**  $\delta$  7.35 – 7.21 (m, 5H), 6.73 – 6.65 (m, 2H), 6.59 – 6.47 (m, 2H), 4.87 (d,  $J = 2.6$  Hz, 0.25H), 4.77 (d,  $J = 3.5$  Hz, 0.75H), 4.64 (d,  $J = 3.5$  Hz, 0.75H), 4.40 (d,  $J = 2.6$  Hz, 0.25H), 4.29 – 3.74 (m, 2H), 3.67 (s, 2.25H), 3.66 (s, 0.75H), 2.14 (s, 0.75H) 2.10 (s, 2.25H).  **$^{13}\text{C}$  NMR (101 MHz,  $\text{CDCl}_3$ ):**  $\delta$  207.6, 207.5, 158.5, 152.7, 140.4, 140.2, 137.4, 136.5, 128.7  $\times$  2 (128.74, 128.68), 128.6, 128.1, 127.4, 127.0, 122.2, 115.7, 114.8, 114.4, 80.8, 79.8, 60.6, 59.3, 55.6, 55.5, 26.8, 25.3. **HPLC:** Daicel Chiralpak AD-H, hexane/isopropanol = 90:10, flow rate 1.0 mL/min,  $\lambda = 254$  nm, retention time: 23.893 min (*anti* major enantiomer), 20.623 min (*anti* minor enantiomer), 30.311 min (*syn* major enantiomer), 18.439 min (*syn* minor enantiomer).

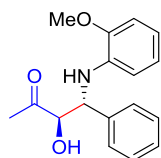

**(3R,4R)-3-Hydroxy-4-((2-methoxyphenyl)amino)-4-phenylbutan-2-one (5j)**

Followed the general procedure (Irradiation was conducted for 18 h, followed by the enzyme-catalyzed reaction for 40 h). 40 mg, 47% yield, yellow oil. **Diastereomeric ratio (dr):** 75:25. **Enantiomeric ratio (er):** 80:20 (*anti*), 53:47 (*syn*).  $R_f = 0.25$  (Petroleum ether/EtOAc, v/v, 3:1).  **$^1\text{H}$  NMR (400 MHz,  $\text{CDCl}_3$ ):**  $\delta$  7.37 – 7.22 (m, 5H), 6.78 – 6.60 (m, 3H), 6.45 (dd,  $J = 7.7, 1.3$  Hz, 0.75H), 6.40 (dd,  $J = 7.7, 1.5$  Hz, 0.25H), 5.21 (br s, 1H), 4.99 (d,  $J = 1.7$  Hz, 0.25H), 4.87 (d,  $J = 3.4$  Hz, 0.75H), 4.71 (s, 0.75H), 4.46 (s, 0.25H), 3.88 (s, 2.25H), 3.86 (s, 0.75H), 2.32 (s, 0.75H), 2.16 (s, 2.25H).  **$^{13}\text{C}$  NMR (101 MHz,  $\text{CDCl}_3$ ):**  $\delta$  207.4, 207.3, 147.3, 147.2, 139.3, 137.3, 136.2, 136.0, 128.7, 128.6, 128.1, 127.6, 127.4, 126.9, 121.0  $\times 2$  (121.05, 121.02), 117.5, 117.4, 111.4  $\times 2$  (111.41, 111.38), 109.7  $\times 2$  (109.74, 109.67), 80.9, 80.0, 59.5, 58.3, 55.5  $\times 2$  (55.54, 55.53), 26.9, 25.3. **HRMS (ESI):** Calculated for  $\text{C}_{17}\text{H}_{20}\text{NO}_3$  ( $[\text{M}+\text{H}]^+$ ): 286.1438, Found: 286.1435; Calculated for  $\text{C}_{17}\text{H}_{19}\text{NNaO}_3$  ( $[\text{M}+\text{Na}]^+$ ): 308.1257, Found: 308.1256. **HPLC:** Daicel Chiralpak AD-H, hexane/isopropanol = 95:5, flow rate 1.0 mL/min,  $\lambda = 254$  nm, retention time: 24.265 min (*anti* major enantiomer), 21.883 min (*anti* minor enantiomer), 20.269 min (*syn* major enantiomer), 16.807 min (*syn* minor enantiomer).

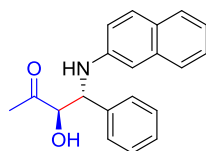

**(3R,4R)-3-Hydroxy-4-(naphthalen-2-ylamino)-4-phenylbutan-2-one (5k)**

Followed the general procedure (Irradiation was conducted for 12 h, followed by the enzyme-catalyzed reaction for 28 h). 63 mg, 69% yield, yellow oil. **Diastereomeric ratio (dr):** 74:26. **Enantiomeric ratio (er):** 86:14 (*anti*), 51:49 (*syn*).  $R_f = 0.70$  (Petroleum ether/EtOAc, v/v, 5:1).  **$^1\text{H}$  NMR (600 MHz,  $\text{CDCl}_3$ ):**  $\delta$  7.64 – 7.57 (m, 2H), 7.51 – 7.45 (m, 1H), 7.34 (d,  $J = 7.2$  Hz, 2H), 7.31 – 7.26 (m, 3H), 7.23 (t,  $J = 2.3$  Hz, 1H), 7.18 – 7.06 (m, 1H), 6.96 – 6.87 (m, 1H), 6.74 – 6.66 (m, 1H), 5.10 – 4.46 (m, 3H), 3.83 – 3.42 (m, 1H), 2.32 – 2.16 (m, 3H).  **$^{13}\text{C}$  NMR (151 MHz,  $\text{CDCl}_3$ ):**  $\delta$  207.1  $\times 2$  (207.14, 207.12), 144.0, 143.8, 137.0, 134.9, 129.1  $\times 2$  (129.13, 129.09), 128.8, 128.7, 128.6, 128.2, 127.9, 127.7, 127.6, 127.4, 126.9, 126.8, 126.3  $\times 2$  (126.33, 126.30), 126.0  $\times 2$

(126.04, 126.00), 122.4, 122.0, 118.3, 118.0, 114.1, 113.8, 106.7, 106.5, 80.7, 79.8, 59.6, 58.4, 26.8, 25.2. **HRMS (ESI)**: Calculated for C<sub>20</sub>H<sub>19</sub>NNaO<sub>2</sub> ([M+Na]<sup>+</sup>): 328.1308, Found: 328.1309. **HPLC**: Daicel Chiralpak AS-H, hexane/isopropanol = 90:10, flow rate 1.0 mL/min, λ = 254 nm, retention time: 36.680 min (*anti* major enantiomer), 24.209 min (*anti* minor enantiomer), 33.739 min (*syn* major enantiomer), 38.521 min (*syn* minor enantiomer).

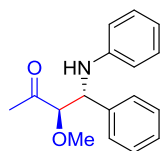

**(3R,4R)-3-Methoxy-4-phenyl-4-(phenylamino)butan-2-one (5l)**

Followed the general procedure (Irradiation was conducted for 12 h, followed by the enzyme-catalyzed reaction for 36 h). 66 mg, 82% yield, white solid. **Diastereomeric ratio (dr)**: 83:17. **Enantiomeric ratio (er)**: 84:16 (*anti*), 69:31 (*syn*).  $R_f = 0.30$  (Petroleum ether/EtOAc, v/v, 5:1). Mixture of two diastereomers: **<sup>1</sup>H NMR (600 MHz, CDCl<sub>3</sub>)**: δ 7.36–7.31 (m, 2H), 7.31–7.26 (m, 2H), 7.25–7.21 (m, 1H), 7.11–7.03 (m, 2H), 6.68–6.61 (m, 1H), 6.58 (d,  $J = 7.9$  Hz, 1.68H), 6.52 (d,  $J = 5.3$  Hz, 0.32H), 4.82 (d,  $J = 1.2$  Hz, 0.32H), 4.68 (d,  $J = 5.2$  Hz, 0.84H), 4.59 (br s, 1H), 3.92 (d,  $J = 5.2$  Hz, 0.84H), 3.83 (d,  $J = 1.4$  Hz, 0.32H), 3.36 (s, 2.52H), 3.28 (s, 0.48H), 2.15 (s, 0.48H), 1.82 (s, 2.52H). **<sup>13</sup>C NMR (151 MHz, CDCl<sub>3</sub>)**: δ 210.5, 209.9, 146.5, 146.2, 139.8, 138.6, 129.2, 129.1, 128.5 × 2 (128.53, 128.48), 127.8 × 2 (127.83, 127.78), 127.5, 127.0, 118.2, 117.9, 114.1, 113.8, 90.6, 89.8, 59.6, 59.4, 59.2, 58.7, 27.2, 26.5. **HRMS (ESI)**: Calculated for C<sub>17</sub>H<sub>20</sub>NO<sub>2</sub> ([M+H]<sup>+</sup>): 270.1489, Found: 270.1489; Calculated for C<sub>17</sub>H<sub>19</sub>NNaO<sub>2</sub> ([M+Na]<sup>+</sup>): 292.1308, Found: 292.1307; Calculated for C<sub>17</sub>H<sub>19</sub>KNO<sub>2</sub> ([M+K]<sup>+</sup>): 308.1047, Found: 308.1047. **HPLC**: Daicel Chiralpak AD-H, hexane/isopropanol = 97:3, flow rate 0.7 mL/min, λ = 254 nm, retention time: 41.968 min (*anti* major enantiomer), 27.972 min (*anti* minor enantiomer), 26.171 min (*syn* major enantiomer), 20.844 min (*syn* minor enantiomer).

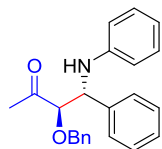

**(3R,4R)-3-(Benzyloxy)-4-phenyl-4-(phenylamino)butan-2-one (5m)**

Followed the general procedure (Irradiation was conducted for 12 h, followed by the enzyme-catalyzed reaction for 40 h). 66 mg, 64% yield, yellow oil. **Diastereomeric ratio (dr)**: 85:15.

**Enantiomeric ratio (er):** 83:17 (*anti*), 65:35 (*syn*).  $R_f = 0.45$  (Petroleum ether/EtOAc, v/v, 5:1). Mixture of two diastereomers:  **$^1\text{H NMR}$  (600 MHz,  $\text{CDCl}_3$ ):**  $\delta$  7.36 – 7.27 (m, 7H), 7.26 – 7.23 (m, 1H), 7.23 – 7.19 (m, 2H), 7.08 – 7.03 (m, 2H), 6.67 – 6.61 (m, 1H), 6.51 (d,  $J = 7.8$  Hz, 2H), 4.69 (d,  $J = 5.6$  Hz, 0.85H), 4.63 – 4.36 (m, 2.15H), 4.34 (d,  $J = 11.8$  Hz, 0.85H), 4.26 (d,  $J = 5.6$  Hz, 0.15H), 4.09 (d,  $J = 5.6$  Hz, 0.85H), 4.06 (d,  $J = 2.0$  Hz, 0.15H), 2.18 (s, 0.45H), 1.87 (s, 2.55H).  **$^{13}\text{C NMR}$  (151 MHz,  $\text{CDCl}_3$ ):**  $\delta$  210.5, 209.5, 146.4, 146.2, 139.7, 138.7, 137.0, 136.8, 129.3, 129.2, 128.8, 128.6  $\times 2$  (128.62, 128.55), 128.5, 128.2, 128.1, 128.0  $\times 2$  (128.02, 127.95), 127.9, 127.8, 127.5, 127.1, 118.1, 117.9, 114.0, 113.8, 88.0, 87.3, 73.8, 73.6, 59.3, 58.9, 27.5, 26.6. **HRMS (ESI):** Calculated for  $\text{C}_{23}\text{H}_{24}\text{NO}_2$  ( $[\text{M}+\text{H}]^+$ ): 346.1802, Found: 346.1799; Calculated for  $\text{C}_{23}\text{H}_{23}\text{NNaO}_2$  ( $[\text{M}+\text{Na}]^+$ ): 368.1621, Found: 368.1619; Calculated for  $\text{C}_{23}\text{H}_{23}\text{KNO}_2$  ( $[\text{M}+\text{K}]^+$ ): 384.1360, Found: 384.1359. **HPLC:** Daicel Chiralpak OD-H, hexane/isopropanol = 99:1, flow rate 1.0 mL/min,  $\lambda = 254$  nm, retention time: 26.702 min (*anti* major enantiomer), 43.411 min (*anti* minor enantiomer), 22.056 min (*syn* major enantiomer), 37.099 min (*syn* minor enantiomer).

## 11. Comparison of dr determined by HPLC and $^1\text{HNMR}$ analysis of mixture.

**Table S9.** Comparison of dr determined by HPLC and  $^1\text{HNMR}$  analysis of the mixture.

| Entry | Product   | dr of isolated products determined by HPLC analysis | dr of crude reaction mixtures determined by $^1\text{HNMR}$ analysis |
|-------|-----------|-----------------------------------------------------|----------------------------------------------------------------------|
| 1     | <b>3a</b> | 75/25 ( <i>syn/anti</i> )                           | 75/25 ( <i>syn/anti</i> )                                            |
| 2     | <b>3j</b> | 78/22 ( <i>syn/anti</i> )                           | 79/21 ( <i>syn/anti</i> )                                            |
| 3     | <b>3l</b> | 93/7 ( <i>syn/anti</i> )                            | 90/10 ( <i>syn/anti</i> )                                            |
| 4     | <b>5a</b> | 76/24 ( <i>anti/syn</i> )                           | 76/24 ( <i>anti/syn</i> )                                            |
| 5     | <b>5l</b> | 83/17 ( <i>anti/syn</i> )                           | 83/17 ( <i>anti/syn</i> )                                            |
| 6     | <b>5m</b> | 85/15 ( <i>anti/syn</i> )                           | 85/15 ( <i>anti/syn</i> )                                            |

### HPLC spectrum of *Rac-3a*

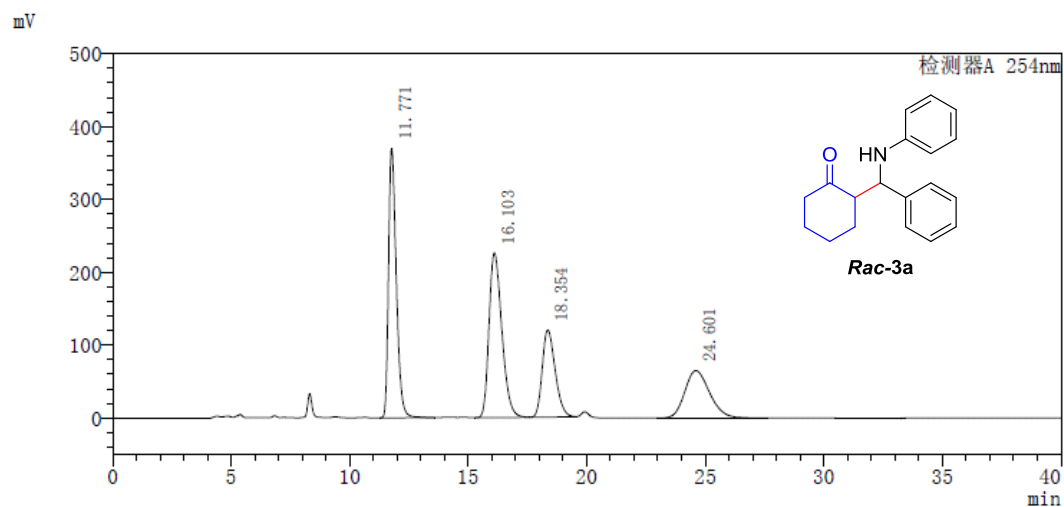

检测器A 254nm

| No. | Retention Time | Area     | Height | Concentration |
|-----|----------------|----------|--------|---------------|
| 1   | 11.771         | 8401948  | 369500 | 32.159        |
| 2   | 16.103         | 8477829  | 225903 | 32.450        |
| 3   | 18.354         | 4537721  | 119703 | 17.369        |
| 4   | 24.601         | 4708447  | 64951  | 18.022        |
| 总计  |                | 26125945 | 780058 |               |

### HPLC spectrum of **3a**

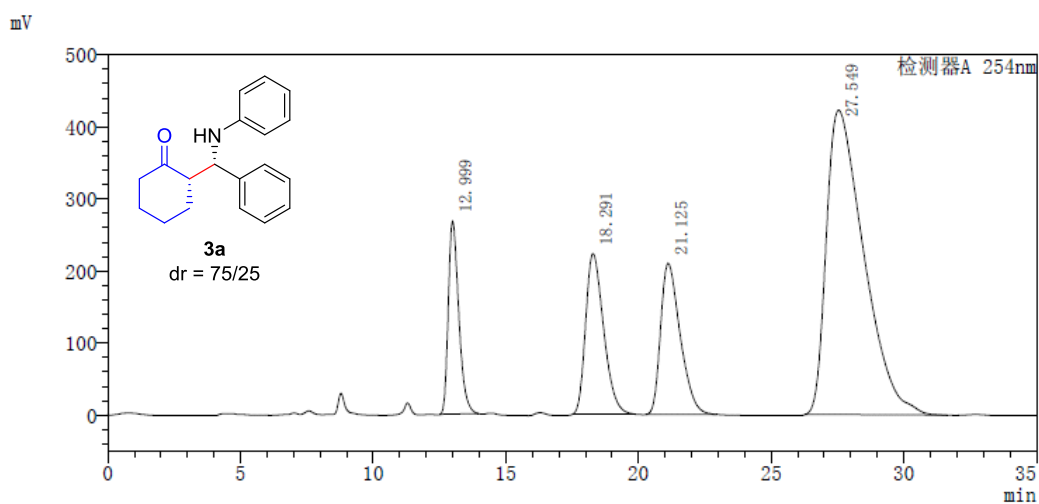

检测器A 254nm

| No. | Retention Time | Area     | Height  | Concentration |
|-----|----------------|----------|---------|---------------|
| 1   | 12.999         | 7337657  | 267309  | 10.459        |
| 2   | 18.291         | 10543487 | 222899  | 15.029        |
| 3   | 21.125         | 10767896 | 209409  | 15.349        |
| 4   | 27.549         | 41505024 | 422224  | 59.163        |
| 总计  |                | 70154064 | 1121840 |               |

<sup>1</sup>H NMR Spectrum (400 MHz, DMSO-*d*<sub>6</sub>) of **3a** (Crude reaction mixture)

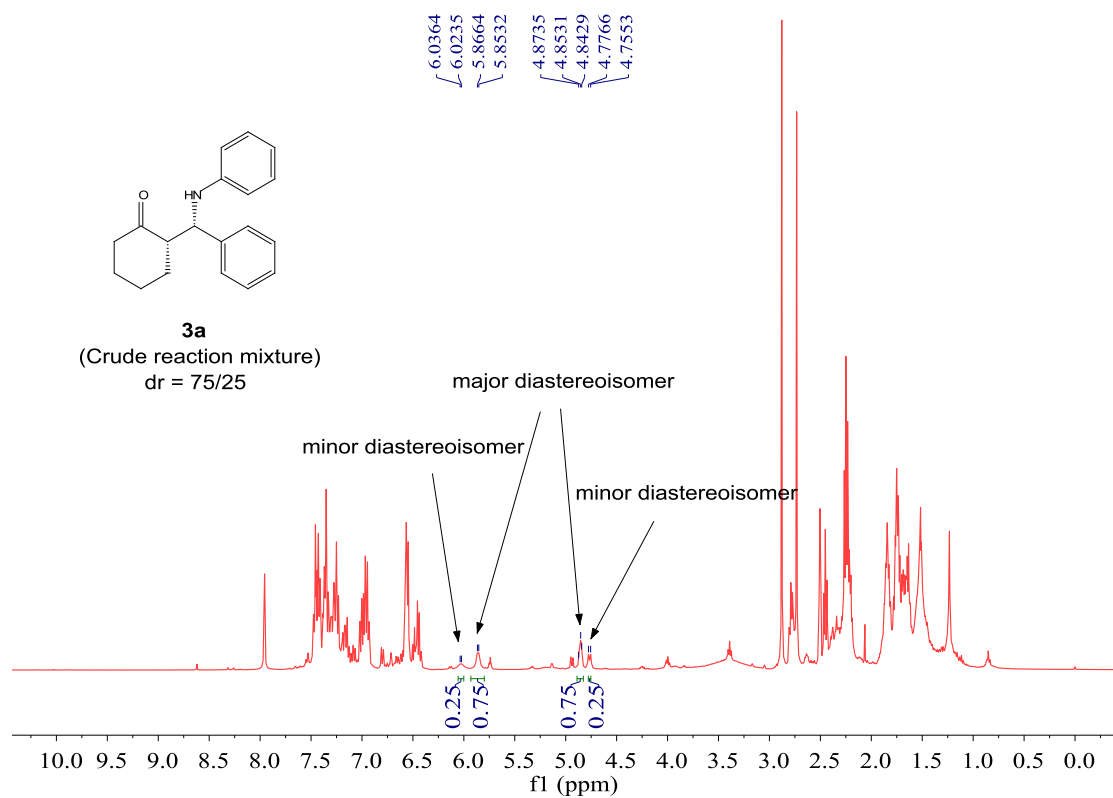

HPLC spectrum of **Rac-3j**

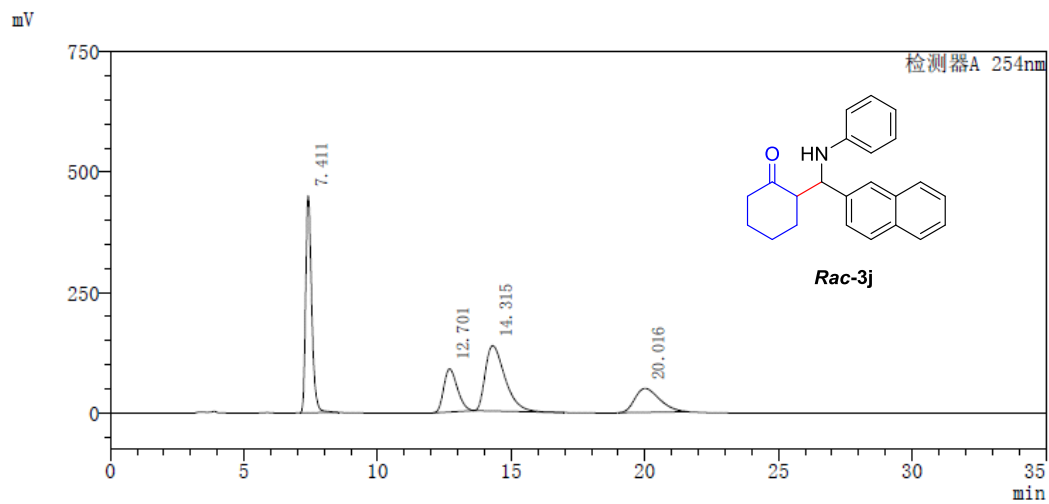

检测器A 254nm

| No. | Retention Time | Area     | Height | Concentration |
|-----|----------------|----------|--------|---------------|
| 1   | 7.411          | 7041227  | 451410 | 34.538        |
| 2   | 12.701         | 3174983  | 89458  | 15.574        |
| 3   | 14.315         | 6962883  | 135562 | 34.154        |
| 4   | 20.016         | 3207544  | 49717  | 15.734        |
| 总计  |                | 20386636 | 726147 |               |

### HPLC spectrum of **3j**

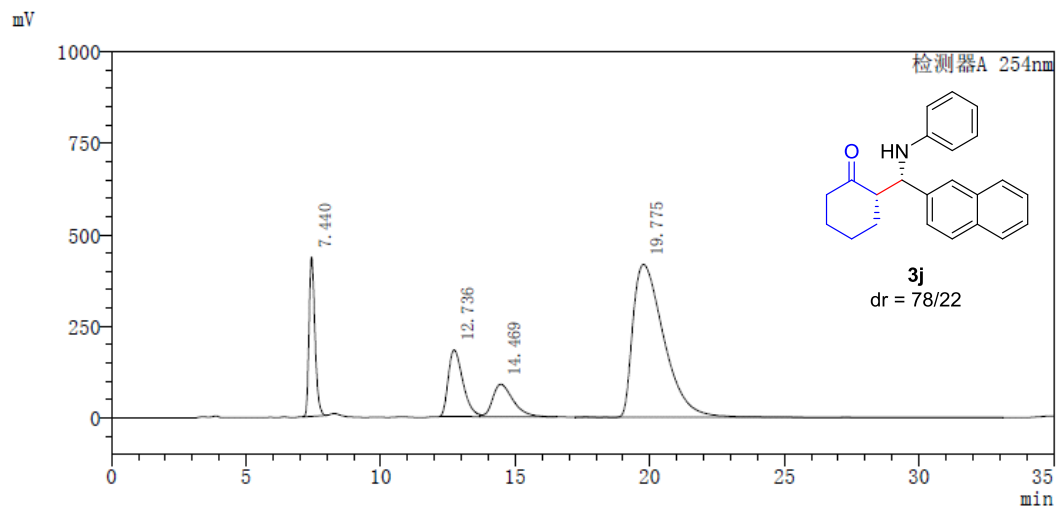

检测器A 254nm

| No. | Retention Time | Area     | Height  | Concentration |
|-----|----------------|----------|---------|---------------|
| 1   | 7.440          | 6673589  | 435276  | 12.860        |
| 2   | 12.736         | 6873230  | 182312  | 13.244        |
| 3   | 14.469         | 4709979  | 88754   | 9.076         |
| 4   | 19.775         | 33639277 | 417749  | 64.820        |
| 总计  |                | 51896075 | 1124091 |               |

### <sup>1</sup>H NMR Spectrum (400 MHz, DMSO-*d*<sub>6</sub>) of **3j** (Crude reaction mixture)

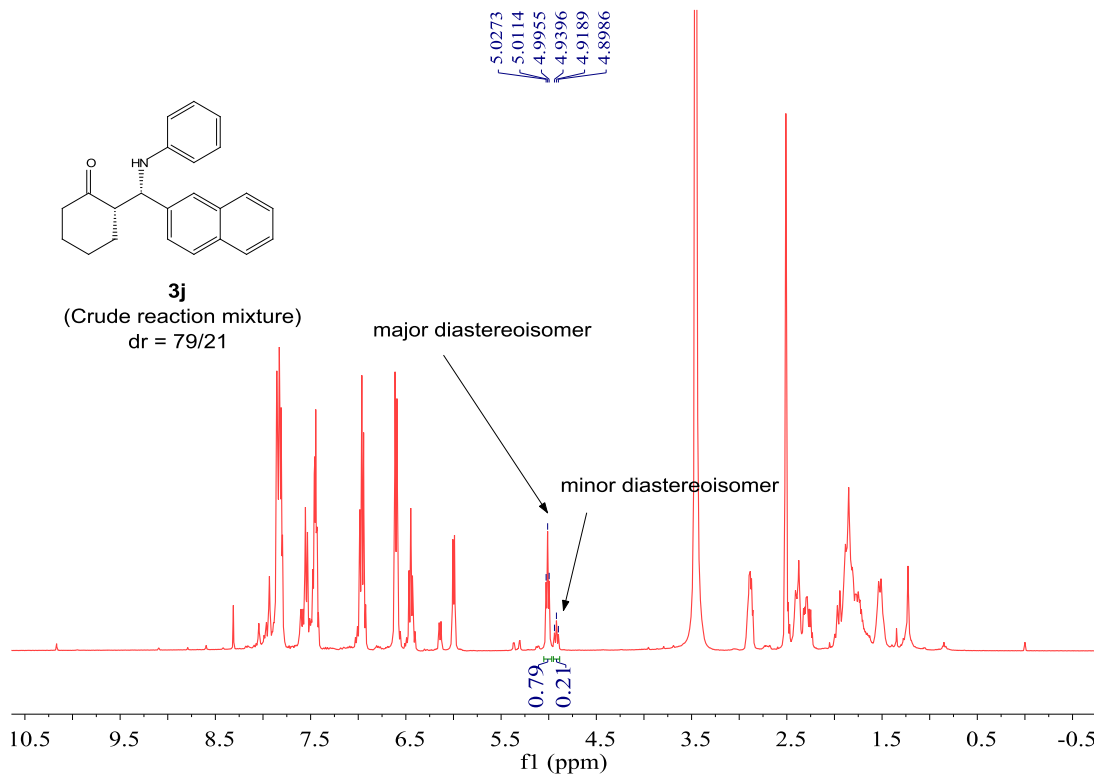



HPLC spectrum of **Rac-3I**

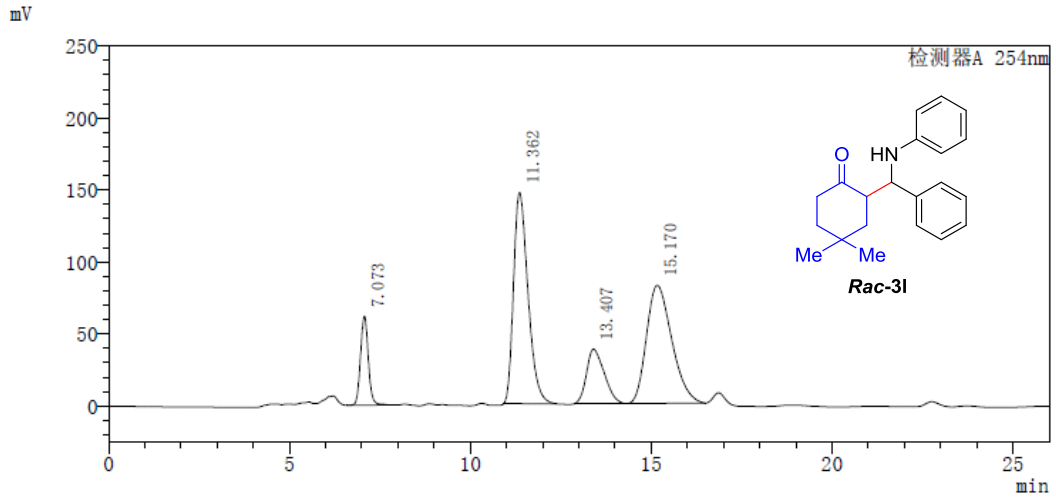

检测器A 254nm

| No. | Retention Time | Area     | Height | Concentration |
|-----|----------------|----------|--------|---------------|
| 1   | 7.073          | 930394   | 61685  | 9.062         |
| 2   | 11.362         | 4075009  | 146518 | 39.689        |
| 3   | 13.407         | 1282763  | 37804  | 12.494        |
| 4   | 15.170         | 3979225  | 81840  | 38.756        |
| 总计  |                | 10267391 | 327846 |               |

HPLC spectrum of **3I**

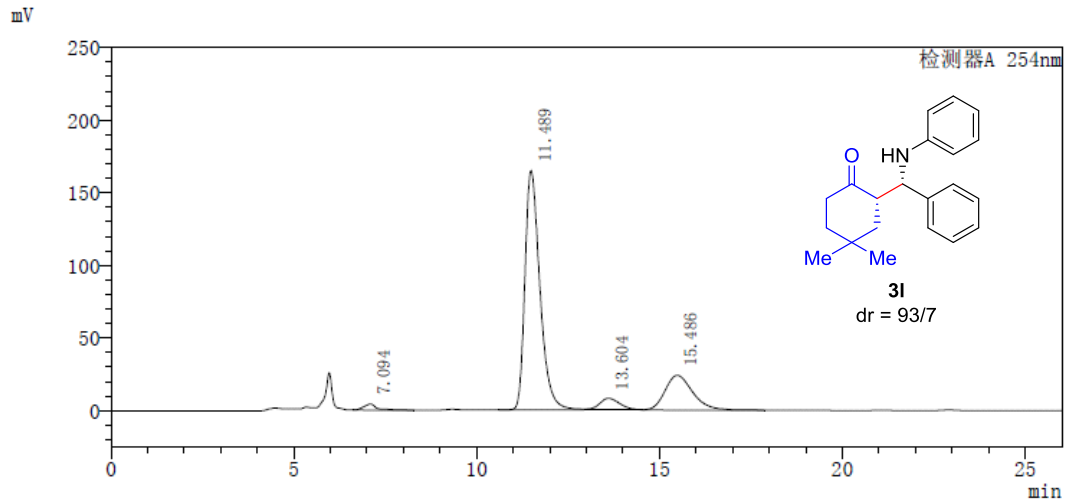

检测器A 254nm

| No. | Retention Time | Area    | Height | Concentration |
|-----|----------------|---------|--------|---------------|
| 1   | 7.094          | 107527  | 4310   | 1.688         |
| 2   | 11.489         | 4688244 | 164680 | 73.578        |
| 3   | 13.604         | 314134  | 8025   | 4.930         |
| 4   | 15.486         | 1261912 | 23912  | 19.805        |
| 总计  |                | 6371818 | 200927 |               |

<sup>1</sup>H NMR Spectrum (400 MHz, DMSO-*d*<sub>6</sub>) of **31** (Crude reaction mixture)

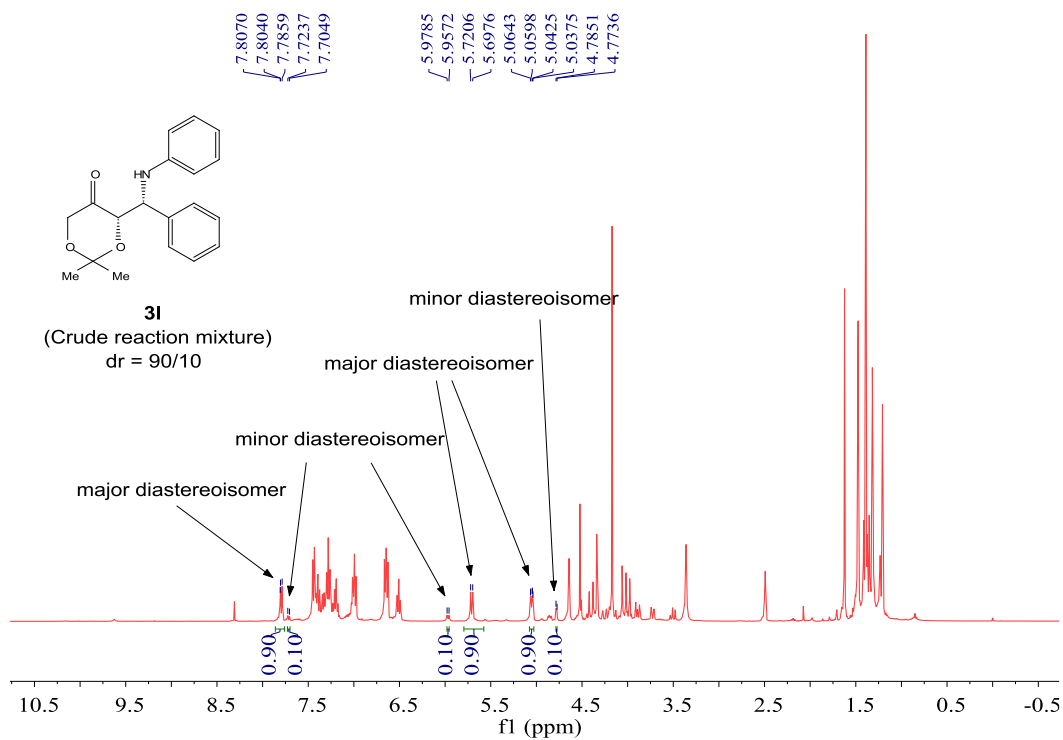

HPLC spectrum of **Rac-5a**

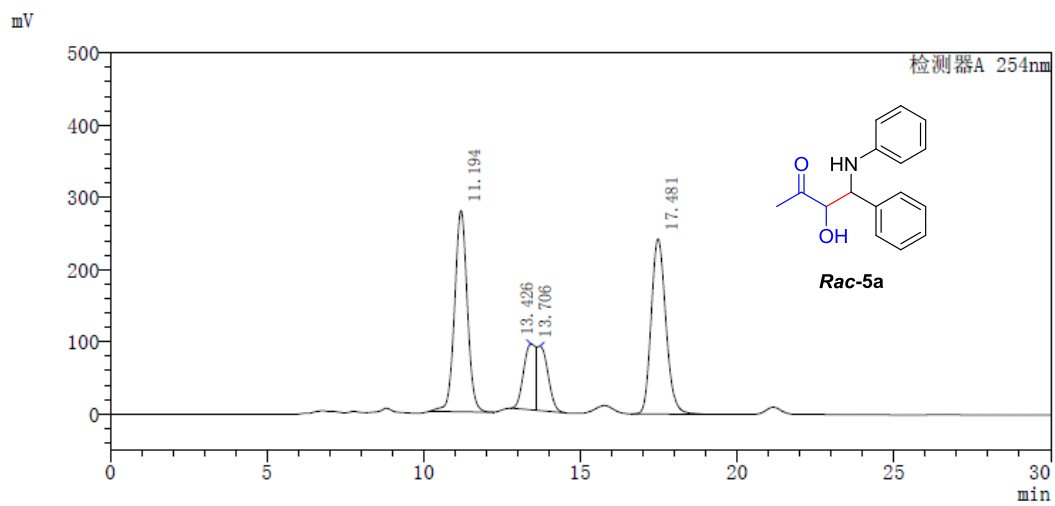

检测器A 254nm

| No. | Retention Time | Area     | Height | Concentration |
|-----|----------------|----------|--------|---------------|
| 1   | 11.194         | 7862006  | 278694 | 38.609        |
| 2   | 13.426         | 2306976  | 91127  | 11.329        |
| 3   | 13.706         | 2297040  | 88878  | 11.280        |
| 4   | 17.481         | 7897257  | 242491 | 38.782        |
| 总计  |                | 20363280 | 701189 |               |

### HPLC spectrum of **5a**

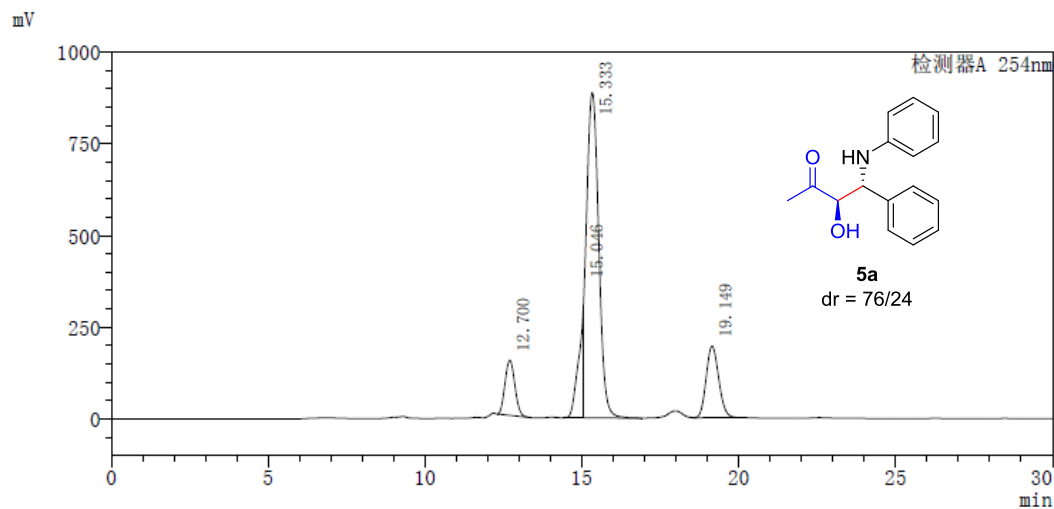

检测器A 254nm

| No. | Retention Time | Area     | Height  | Concentration |
|-----|----------------|----------|---------|---------------|
| 1   | 12.700         | 3286250  | 150384  | 9.168         |
| 2   | 15.046         | 3321781  | 292288  | 9.267         |
| 3   | 15.333         | 23804952 | 887767  | 66.410        |
| 4   | 19.149         | 5432206  | 194962  | 15.155        |
| 总计  |                | 35845189 | 1525401 |               |

### <sup>1</sup>H NMR Spectrum (400 MHz, DMSO-*d*<sub>6</sub>) of **5a** (Crude reaction mixture)

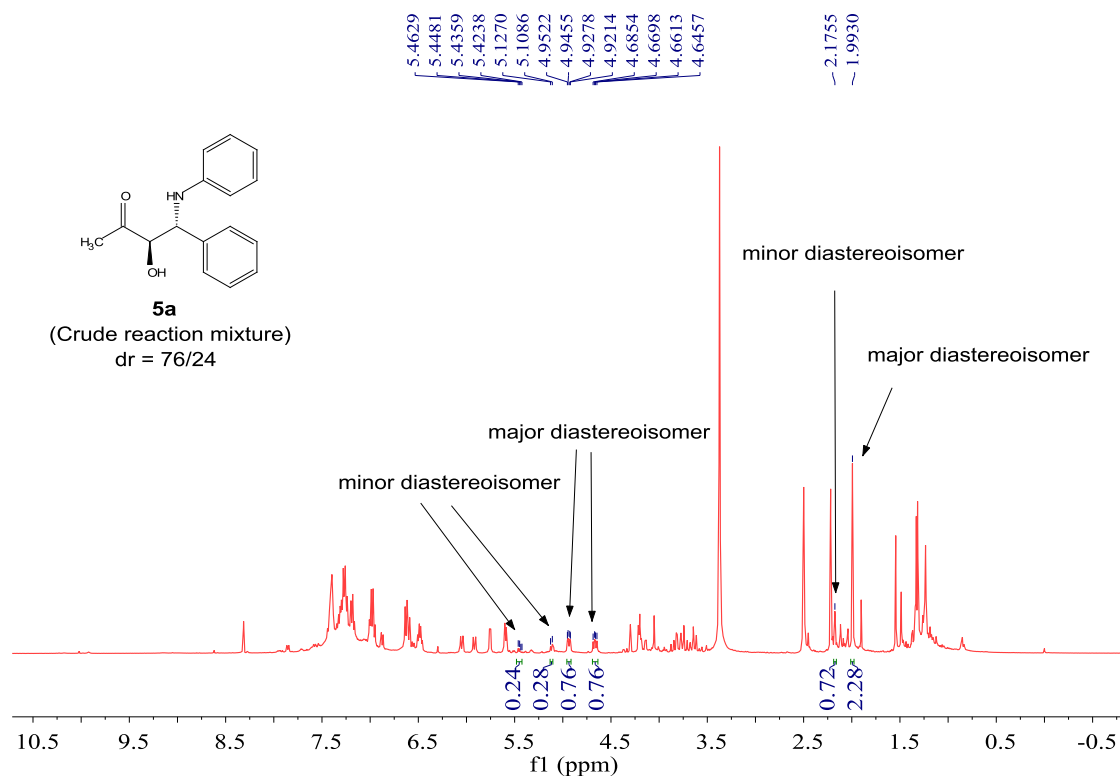

HPLC spectrum of **Rac-5I**

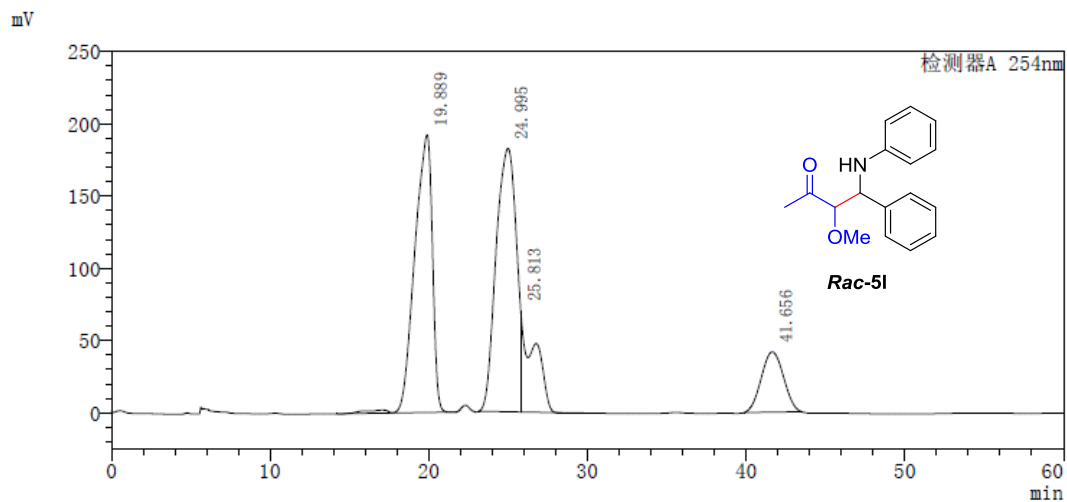

检测器A 254nm

| No. | Retention Time | Area     | Height | Concentration |
|-----|----------------|----------|--------|---------------|
| 1   | 19.889         | 14964440 | 192101 | 38.343        |
| 2   | 24.995         | 15951513 | 182189 | 40.872        |
| 3   | 25.813         | 4056313  | 68333  | 10.393        |
| 4   | 41.656         | 4055674  | 41684  | 10.392        |
| 总计  |                | 39027940 | 484306 |               |

HPLC spectrum of **5I**

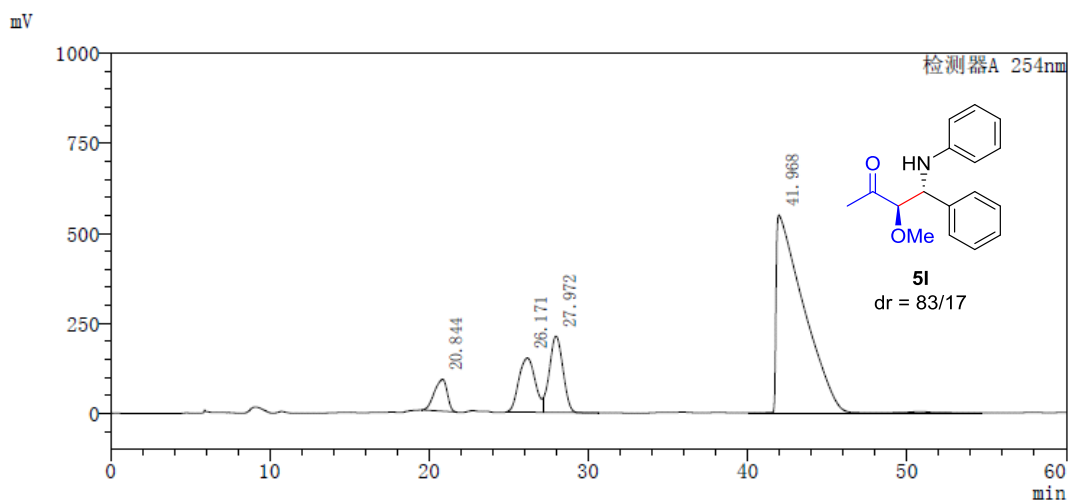

检测器A 254nm

| No. | Retention Time | Area     | Height  | Concentration |
|-----|----------------|----------|---------|---------------|
| 1   | 20.844         | 4933836  | 88521   | 5.228         |
| 2   | 26.171         | 10902284 | 150815  | 11.552        |
| 3   | 27.972         | 12578698 | 212517  | 13.328        |
| 4   | 41.968         | 65962502 | 548951  | 69.892        |
| 总计  |                | 94377320 | 1000804 |               |

<sup>1</sup>H NMR Spectrum (400 MHz, DMSO-*d*<sub>6</sub>) of **51** (Crude reaction mixture)

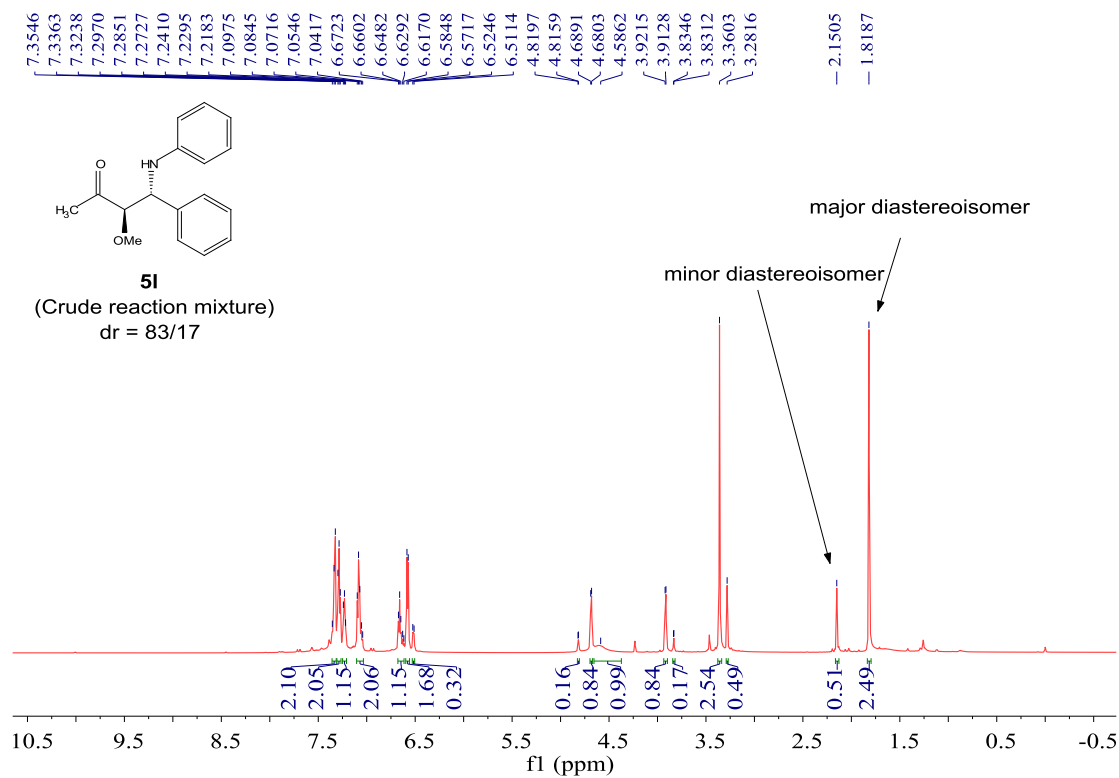

HPLC spectrum of *Rac-5m*

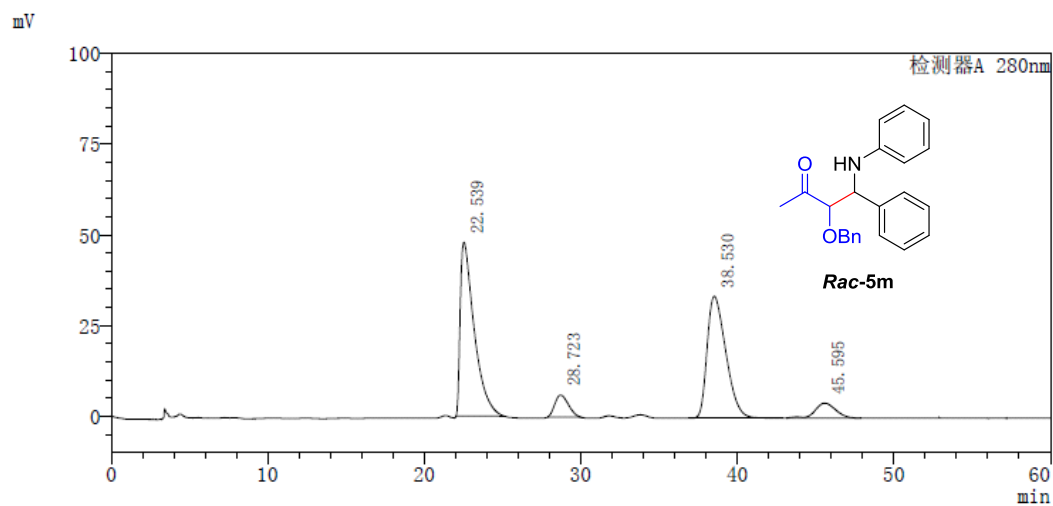

检测器A 280nm

| No. | Retention Time | Area    | Height | Concentration |
|-----|----------------|---------|--------|---------------|
| 1   | 22.539         | 2978868 | 47938  | 45.566        |
| 2   | 28.723         | 368617  | 6082   | 5.638         |
| 3   | 38.530         | 2804840 | 33615  | 42.904        |
| 4   | 45.595         | 385221  | 4148   | 5.892         |
| 总计  |                | 6537546 | 91782  |               |

### HPLC spectrum of **5m**

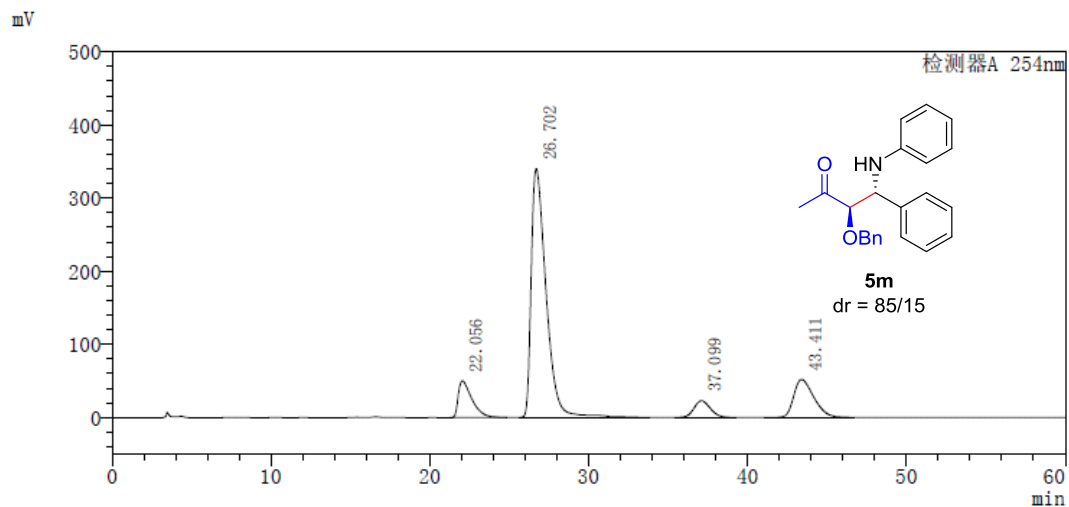

检测器A 254nm

| No. | Retention Time | Area     | Height | Concentration |
|-----|----------------|----------|--------|---------------|
| 1   | 22.056         | 2977804  | 50010  | 9.545         |
| 2   | 26.702         | 22084297 | 339942 | 70.792        |
| 3   | 37.099         | 1617680  | 22730  | 5.186         |
| 4   | 43.411         | 4516347  | 51753  | 14.477        |
| 总计  |                | 31196128 | 464435 |               |

### <sup>1</sup>H NMR Spectrum (400 MHz, DMSO-*d*<sub>6</sub>) of **5m** (Crude reaction mixture)

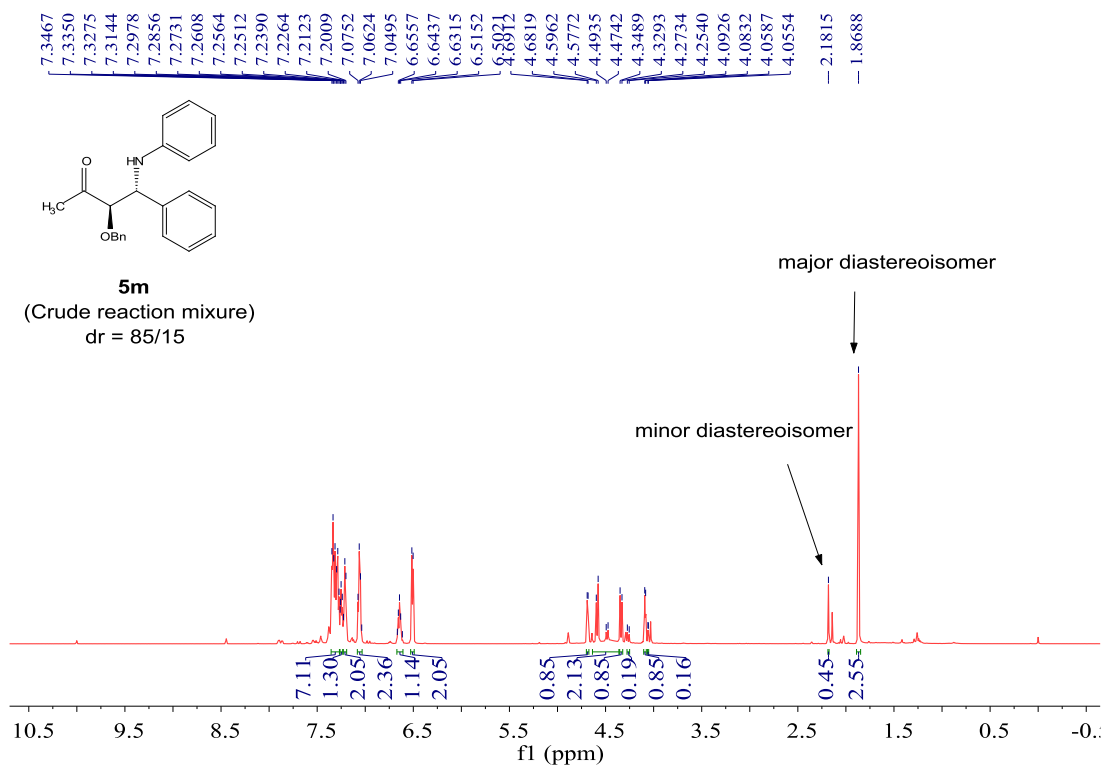

## 12. References

- [1] A. A. Mendes, P. C. Oliveira and H. F. de Castro, Properties and biotechnological applications of porcine pancreatic lipase, *J. Mol. Catal. B: Enzym.*, 2012, **78**, 119–134.
- [2] C.-J. Long, H. Cao, B.-K. Zhao, Y.-F. Tan, Y.-H. He, C.-S. Huang and Z. Guan, Merging the non-natural catalytic activity of lipase and electrosynthesis: Asymmetric oxidative cross-coupling of secondary amines with ketones, *Angew. Chem. Int. Ed.*, 2022, **61**, e202203666.
- [3] C.-J. Long, H.-P. Pu, Y.-N. Zhao, Y.-H. He and Zhi Guan, Cooperative photocatalysis and *L*-/*D*-proline catalysis enabled enantioselective oxidative cross-dehydrogenative coupling of benzylic secondary acyclic amines with ketones, *Org. Chem. Front.*, 2023, **10**, 2177–2185.
- [4] H. Yang and R. G. Carter, Enantioselective Mannich reactions with the practical proline mimetic *N*-(*p*-dodecylphenyl-sulfonyl)-2-pyrrolidinecarboxamide, *J. Org. Chem.*, 2009, **74**, 2246–2249.
- [5] X. Zheng, Y.-B. Qian and Y. Wang, 2-Pyrrolidinecarboxylic acid ionic liquid as a highly efficient organocatalyst for the asymmetric one-pot Mannich reaction. *Eur. J. Org. Chem.*, 2010, **2010**, 515–522.
- [6] J. S. Yadav, B. V. S. Reddy, K. S. Shankar, K. Premalatha and T. Swamy, Iodine/EtOH: A novel and versatile catalyst for the synthesis of  $\beta$ -amino ketones *via* three component reaction, *Lett. Org. Chem.*, 2008, **5**, 353–359.
- [7] T. Ollevier, E. Nadeau and A.-A. Guay-Begin, Direct-type catalytic three-component Mannich reaction in aqueous media, *Tetrahedron Lett.*, 2006, **47**, 8351–8354.
- [8] A. Pettignano, L. Bernardi, M. Fochi, L. Geraci, M. Robitzer, N. Tanchoux and F. Quignard, Alginate acid aerogel: a heterogeneous Brønsted acid promoter for the direct Mannich reaction, *New J. Chem.*, 2015, **39**, 4222–4226.
- [9] M. Samet, B. Eftekhari-Sis, M. M. Hashemi and F. Farmad, Stereoselective synthesis of  $\beta$ -amino ketones *via* direct Mannich-type reaction catalyzed with  $\text{SO}_4^{2-}/\text{TiO}_2$  and  $\text{SO}_4^{2-}/\text{nano TiO}_2$ , *Synthetic Commun.*, 2009, **39**, 4441–4453.
- [10] C. Ayats, A. H. Henseler, E. Dibello and M. A. Pericas, Continuous flow enantioselective three-component *anti*-Mannich reactions catalyzed by a polymer-supported threonine derivative, *ACS Catal.*, 2014, **4**, 3027–3033.
- [11] C. Wu, X. Fu, X. Ma, S. Li and C. Li, Threonine-surfactant organocatalysts for the highly diastereo- and enantioselective direct *anti*-Mannich reactions of hydroxyacetone, *Tetrahedron Lett.*, 2010, **51**, 5775–5777.
- [12] S. S. V. Ramasastry, H. Zhang, F. Tanaka and C. F. Barbas, Direct catalytic asymmetric synthesis of *anti*-1,2-amino alcohols and *syn*-1,2-diols through organocatalytic *anti*-Mannich and *syn*-aldol reactions, *J. Am. Chem. Soc.*, 2007, **129**, 288–289.

### 13. NMR spectra

#### <sup>1</sup>H NMR Spectrum (600 MHz, CDCl<sub>3</sub>) of **3a**

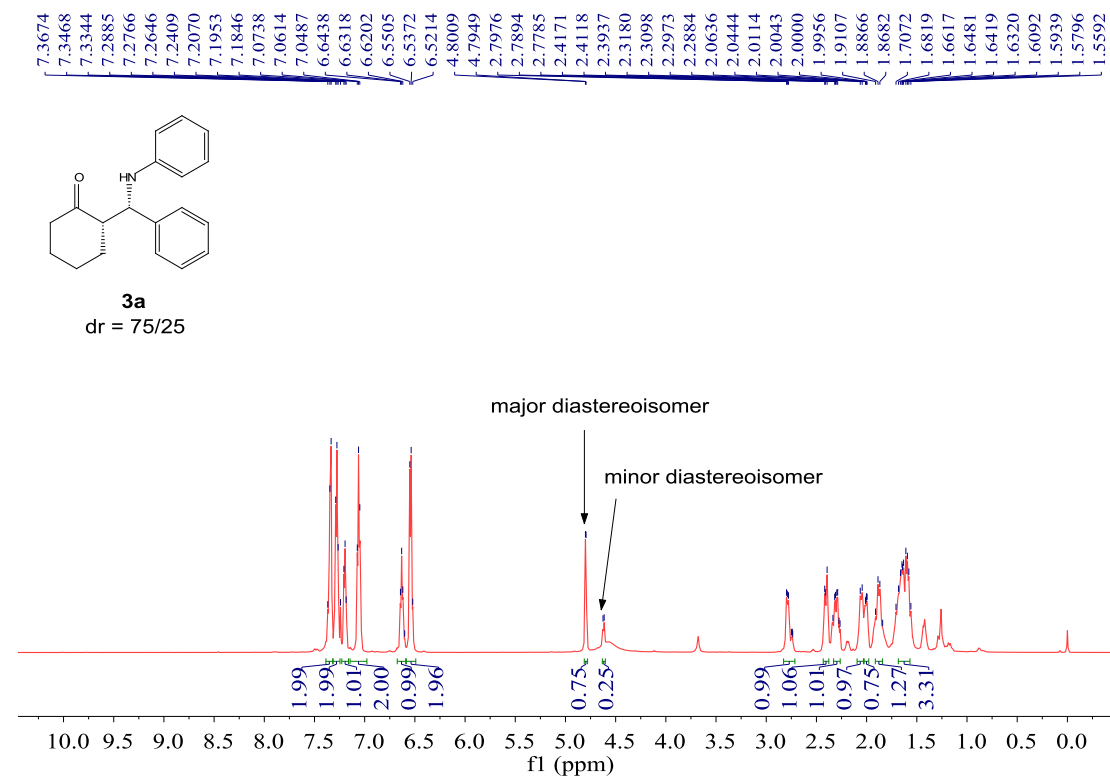

#### <sup>13</sup>C NMR Spectrum (151 MHz, CDCl<sub>3</sub>) of **3a**

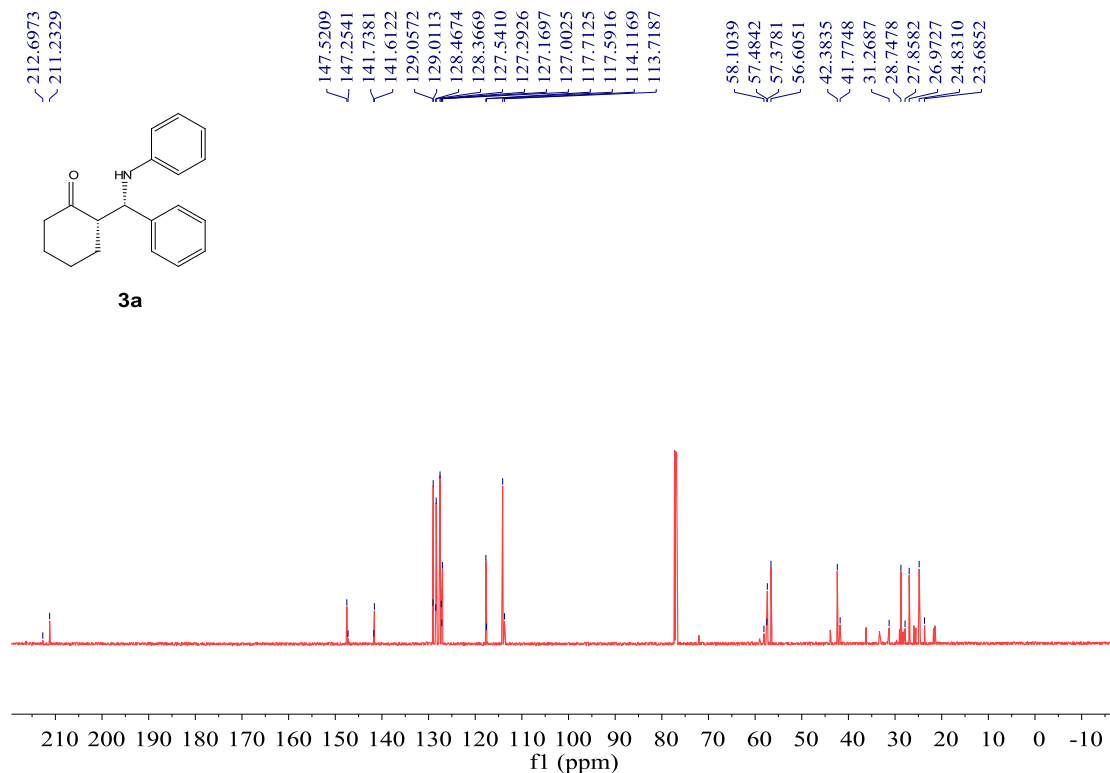



### <sup>1</sup>H NMR Spectrum (600 MHz, CDCl<sub>3</sub>) of **3b**

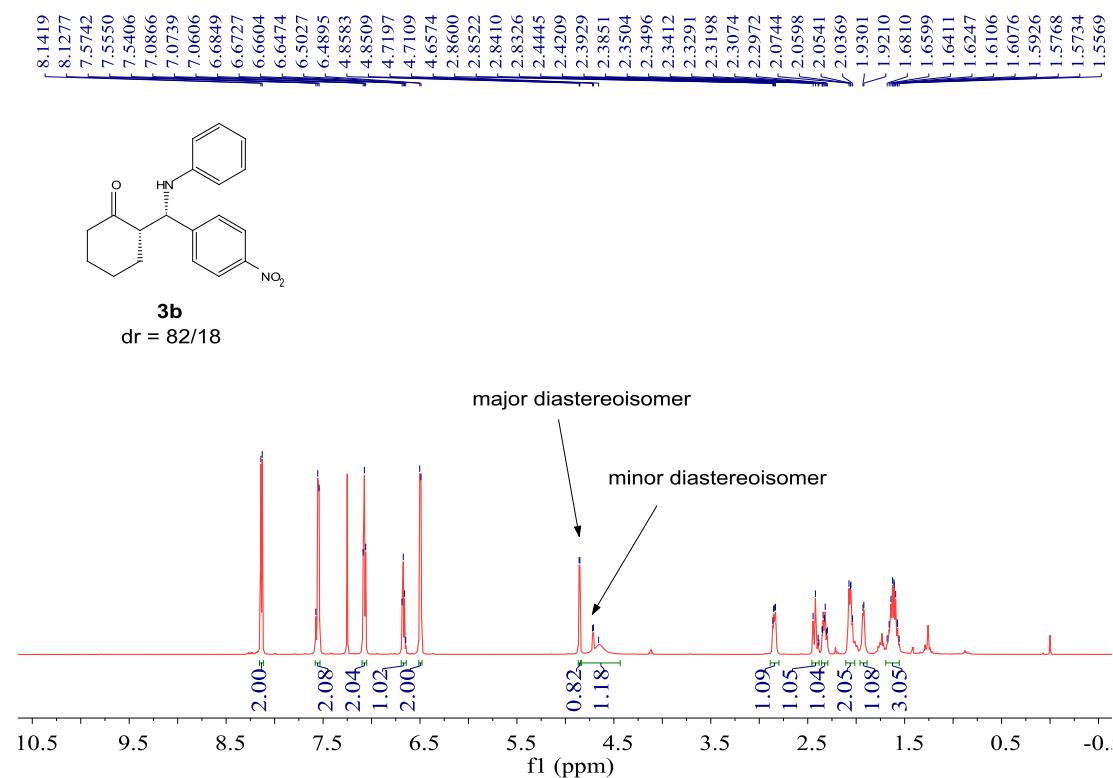

### <sup>13</sup>C NMR Spectrum (151 MHz, CDCl<sub>3</sub>) of **3b**

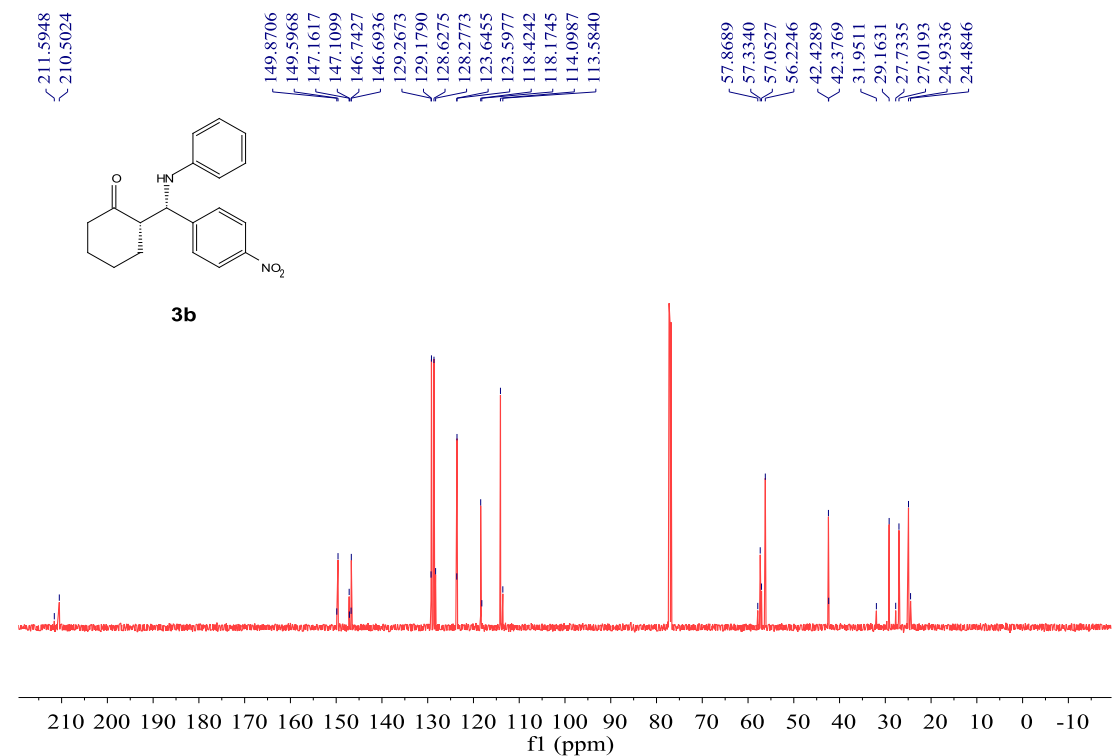

<sup>1</sup>H NMR Spectrum (600 MHz, CDCl<sub>3</sub>) of **3c**

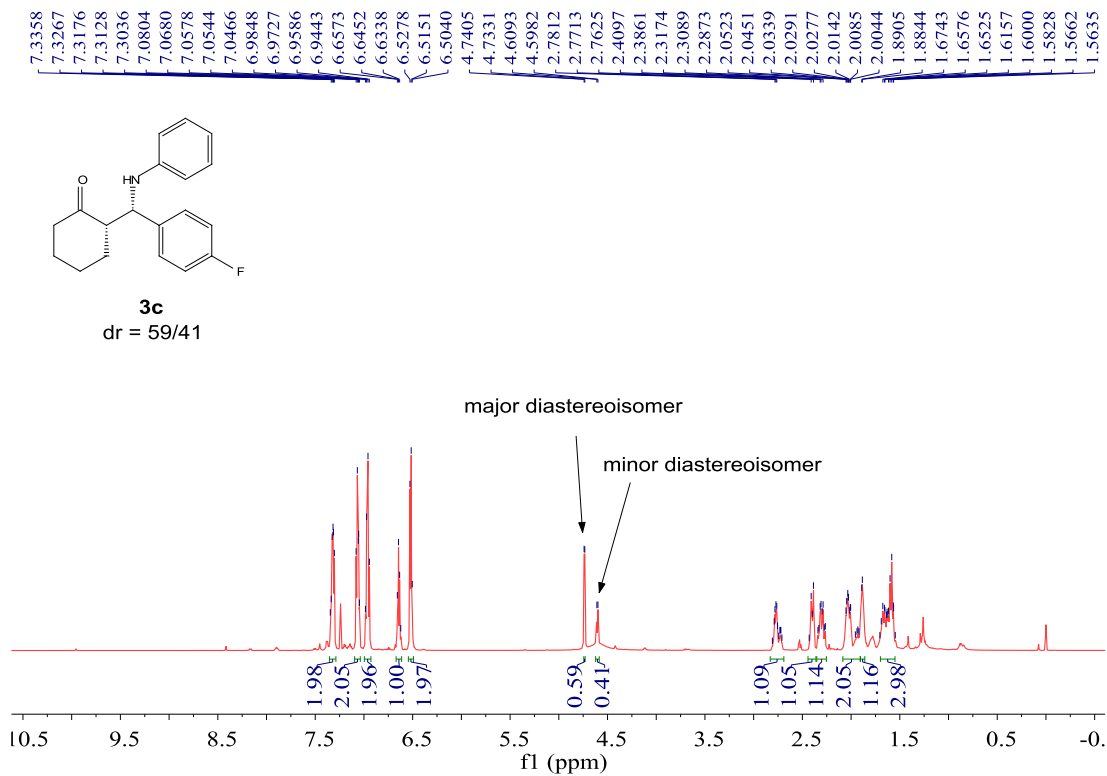

<sup>13</sup>C NMR Spectrum (151 MHz, CDCl<sub>3</sub>) of **3c**

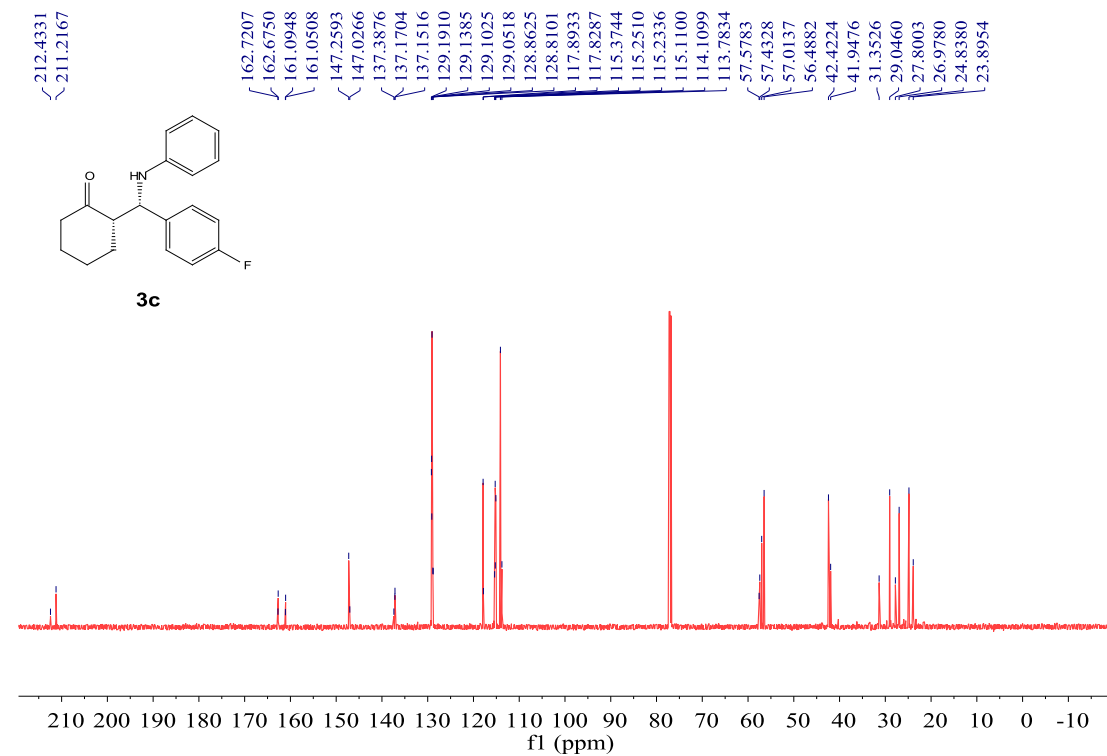

<sup>19</sup>F NMR Spectrum (565 MHz, CDCl<sub>3</sub>) of **3c**

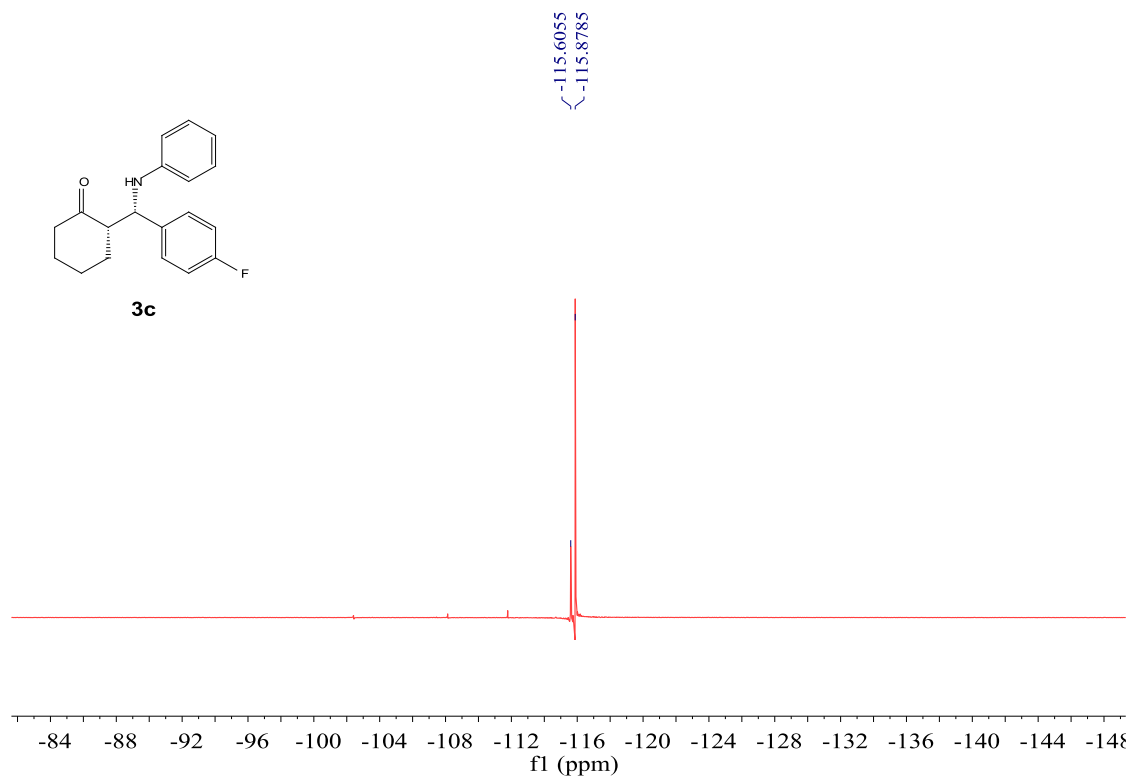

<sup>1</sup>H NMR Spectrum (600 MHz, CDCl<sub>3</sub>) of **3d**

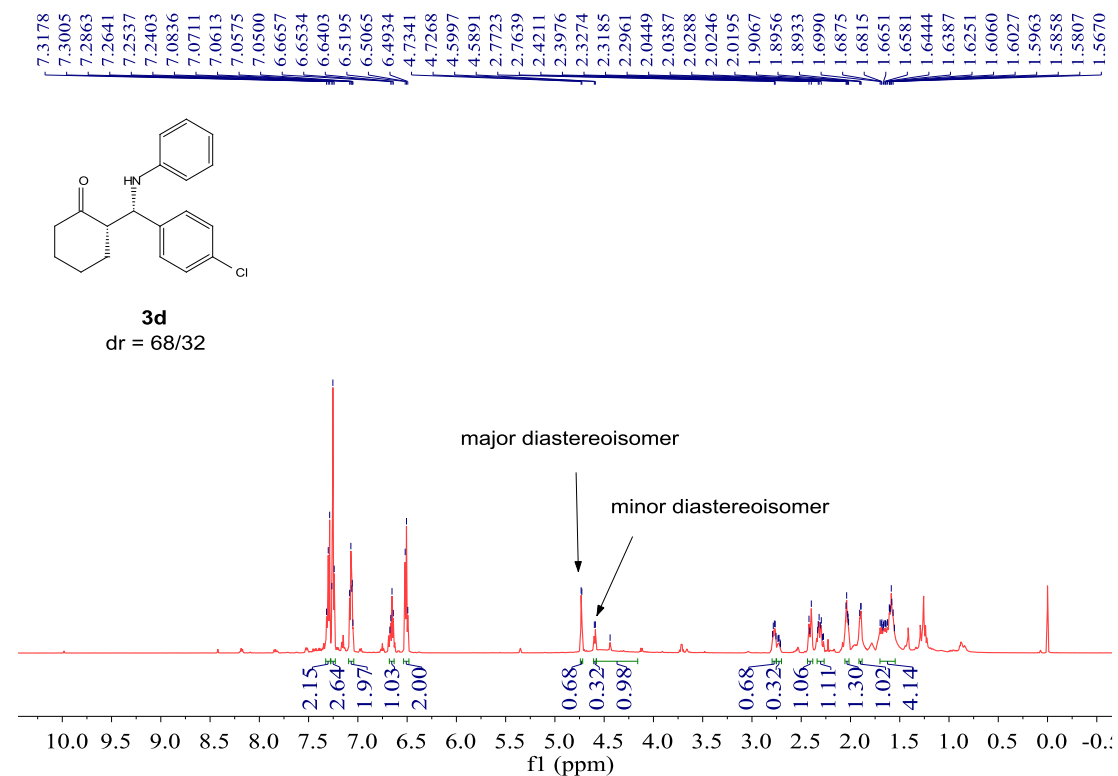

<sup>13</sup>C NMR Spectrum (151 MHz, CDCl<sub>3</sub>) of **3d**

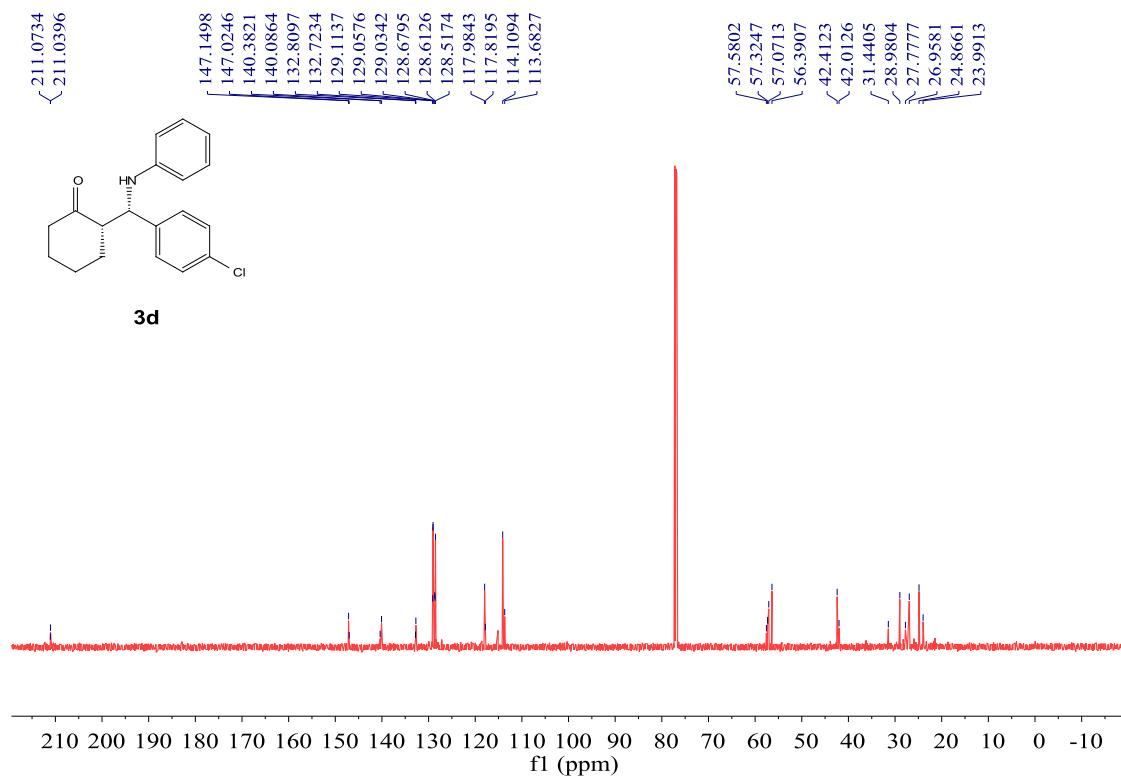

<sup>1</sup>H NMR Spectrum (600 MHz, CDCl<sub>3</sub>) of **3e**

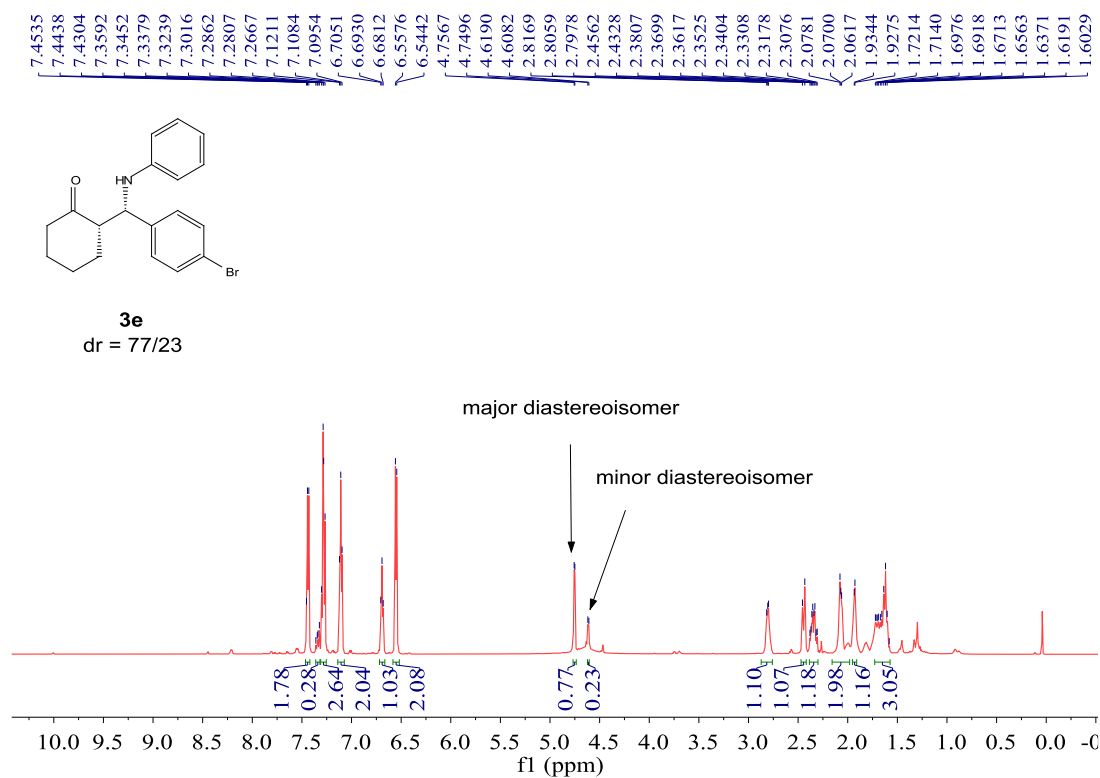

<sup>13</sup>C NMR Spectrum (151 MHz, CDCl<sub>3</sub>) of **3e**

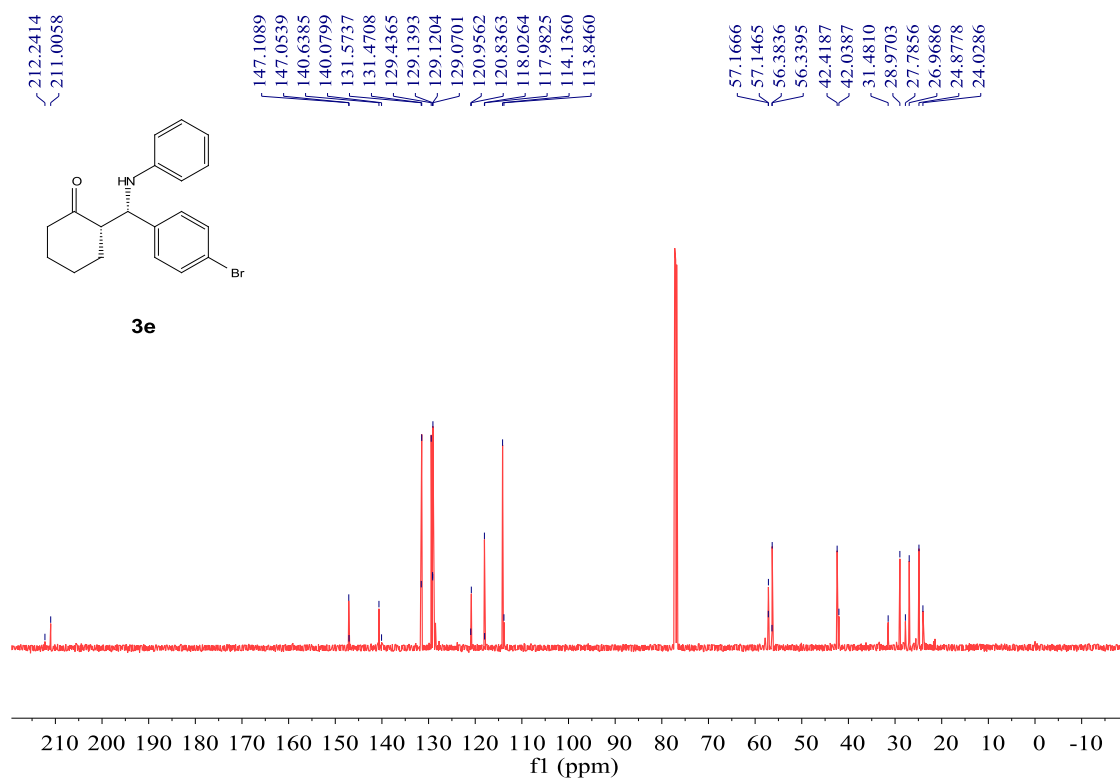

<sup>1</sup>H NMR Spectrum (600 MHz, CDCl<sub>3</sub>) of **3f**

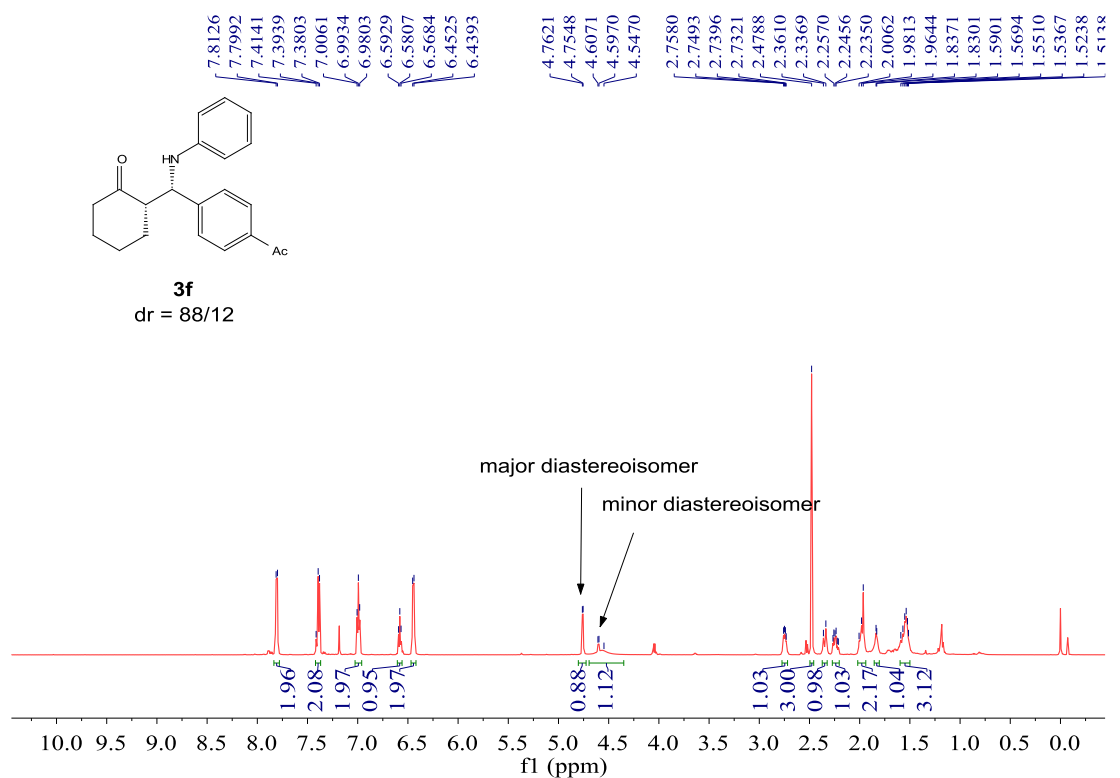

<sup>13</sup>C NMR Spectrum (151 MHz, CDCl<sub>3</sub>) of **3f**

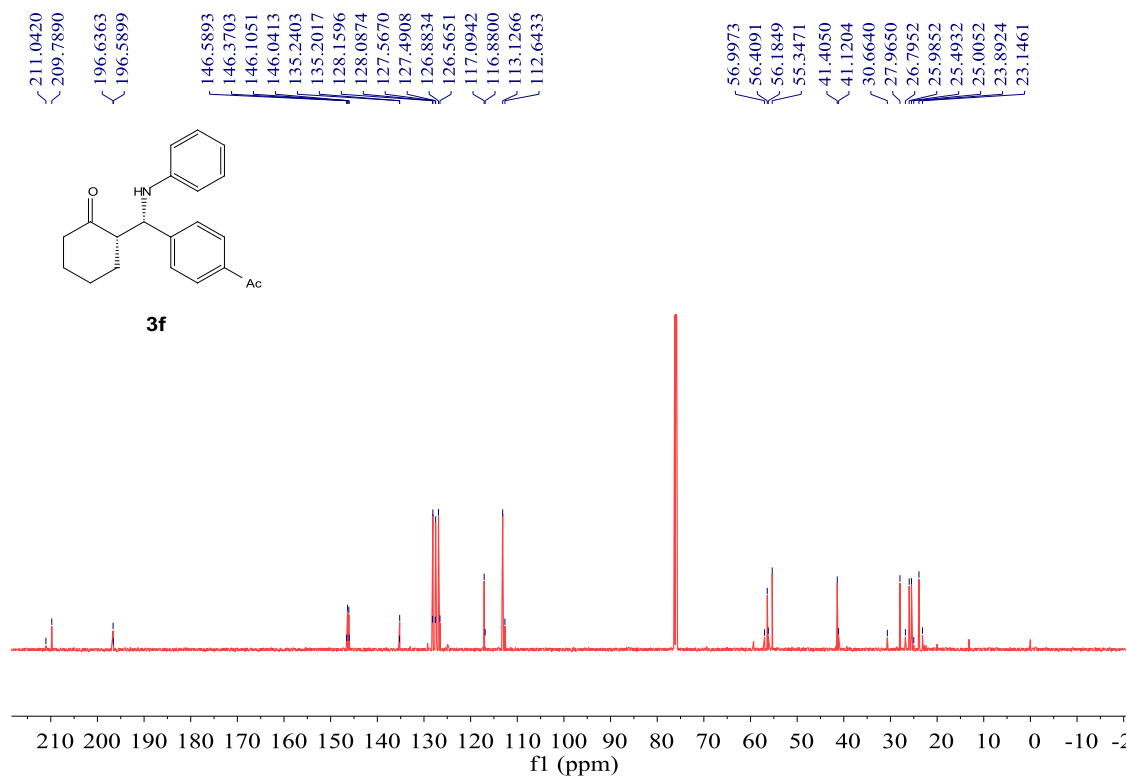

<sup>1</sup>H NMR Spectrum (600 MHz, CDCl<sub>3</sub>) of **3g**

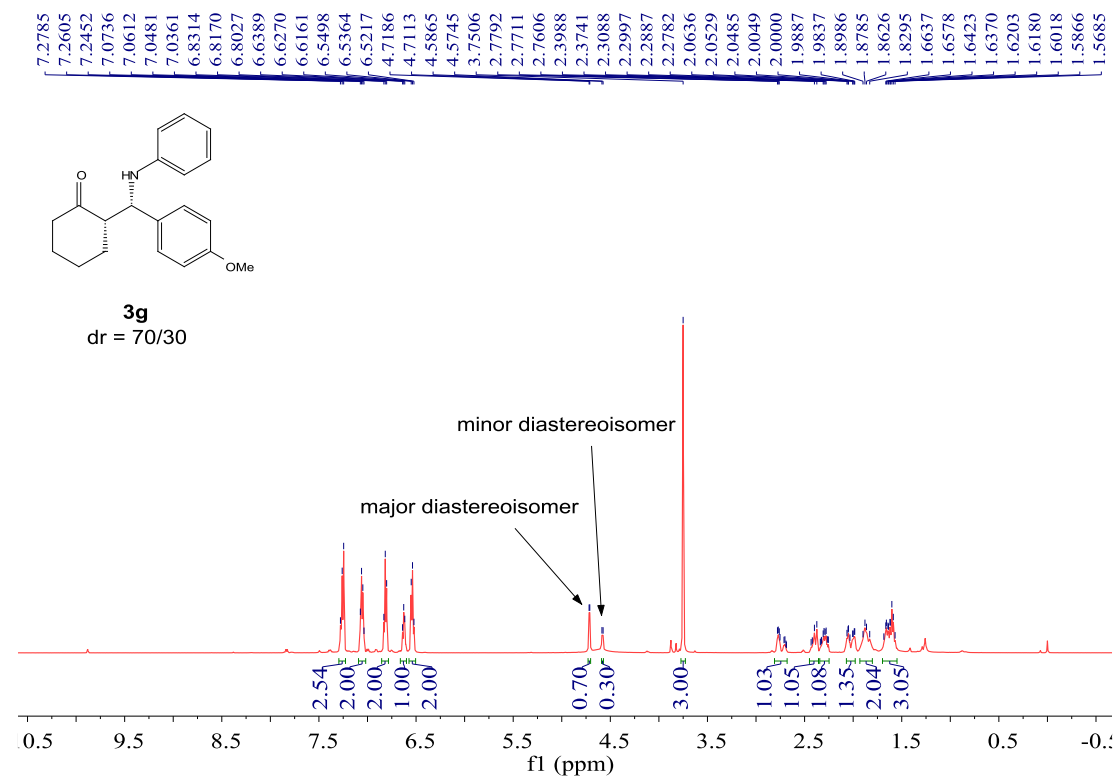

<sup>13</sup>C NMR Spectrum (151 MHz, CDCl<sub>3</sub>) of **3g**

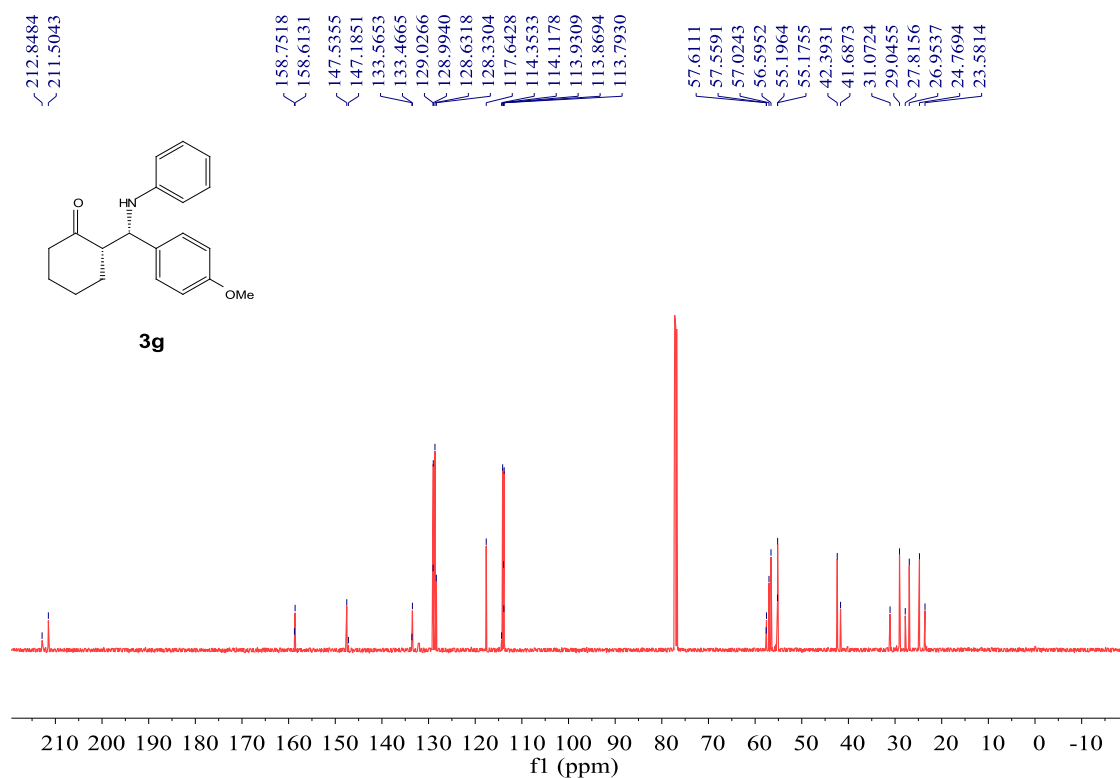

<sup>1</sup>H NMR Spectrum (400 MHz, CDCl<sub>3</sub>) of **3h**

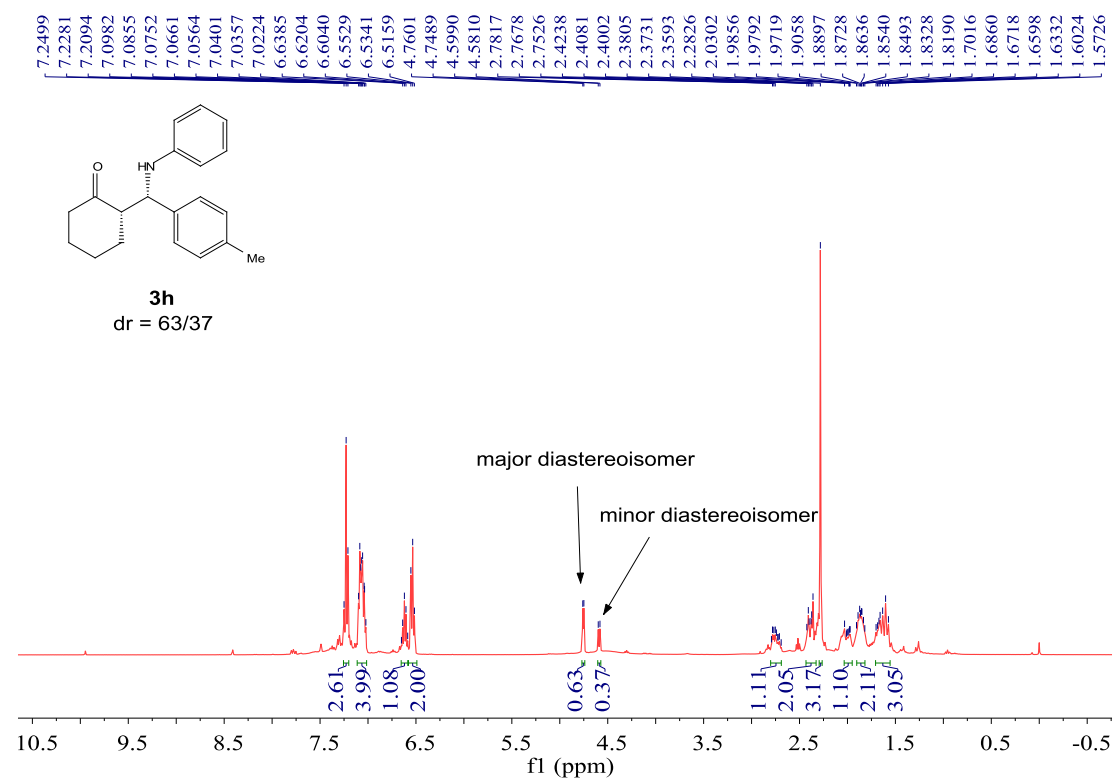

<sup>13</sup>C NMR Spectrum (101 MHz, CDCl<sub>3</sub>) of **3h**

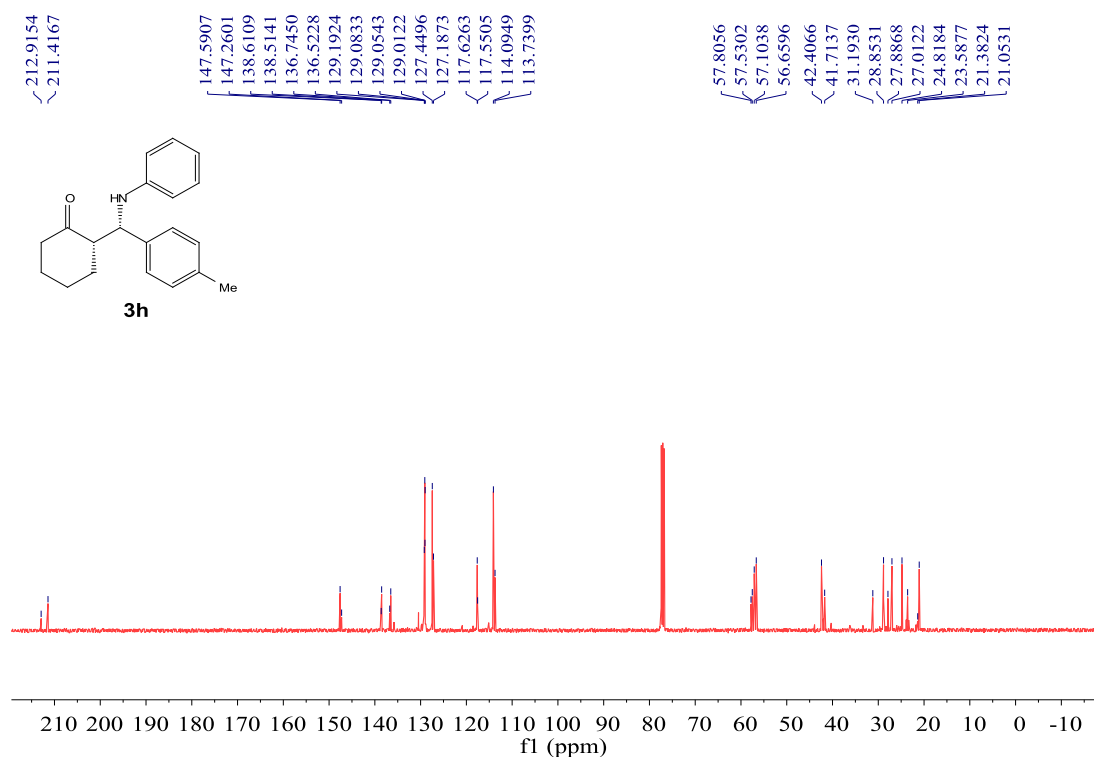

<sup>1</sup>H NMR Spectrum (400 MHz, CDCl<sub>3</sub>) of **3i**

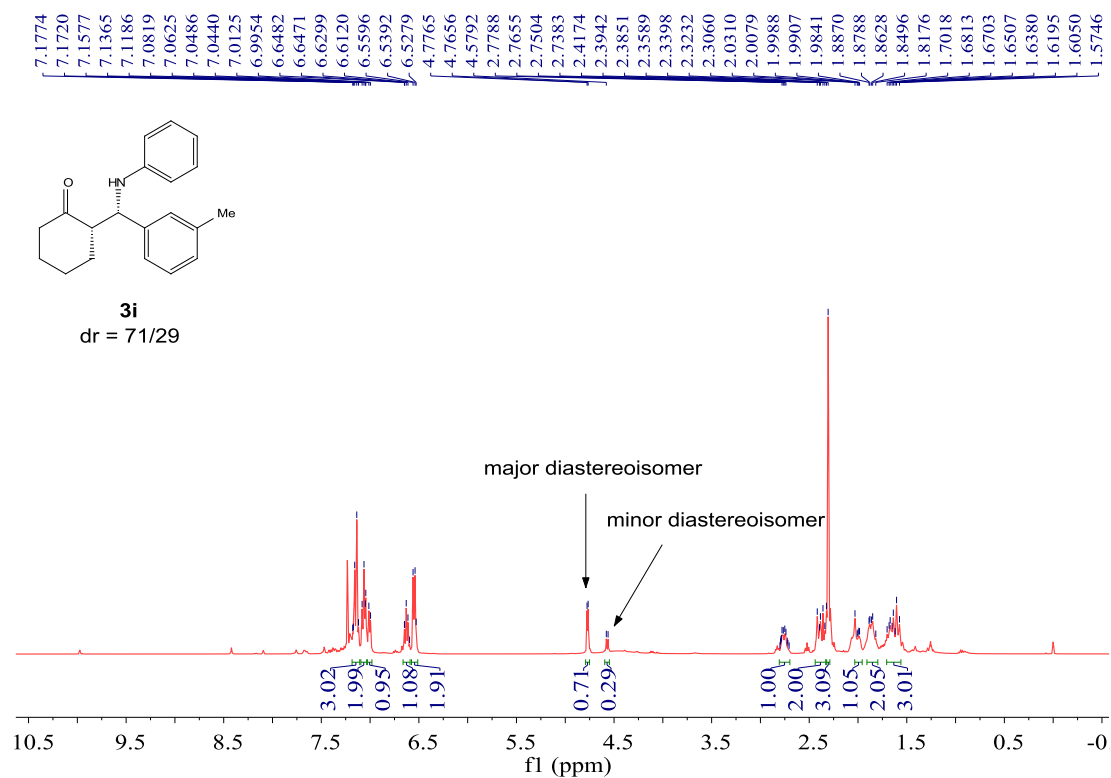



<sup>13</sup>C NMR Spectrum (101 MHz, CDCl<sub>3</sub>) of **3i**

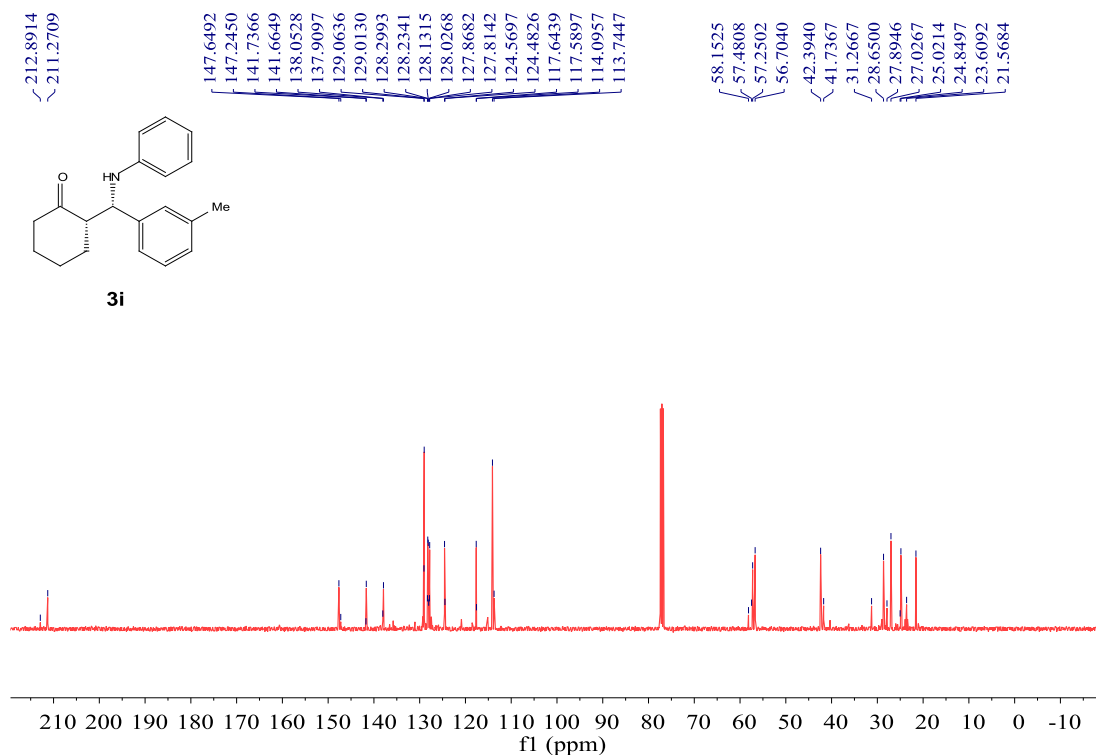

<sup>1</sup>H NMR Spectrum (600 MHz, CDCl<sub>3</sub>) of **3j**

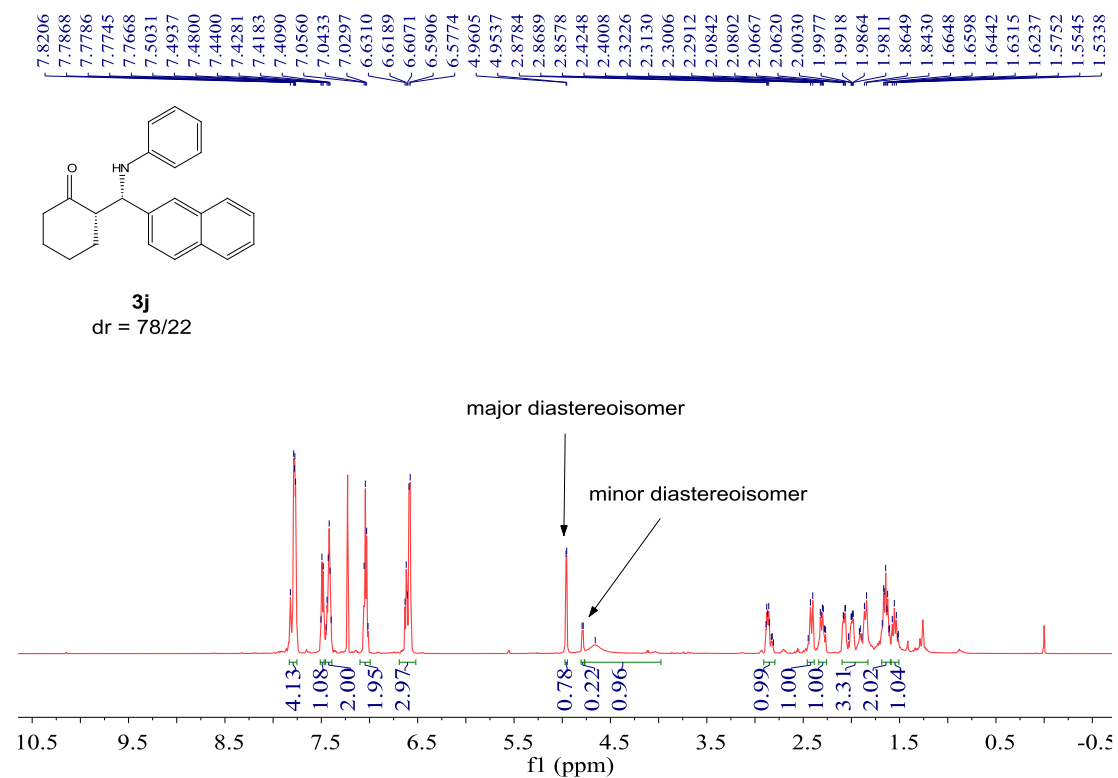

<sup>13</sup>C NMR Spectrum (151 MHz, CDCl<sub>3</sub>) of **3j**

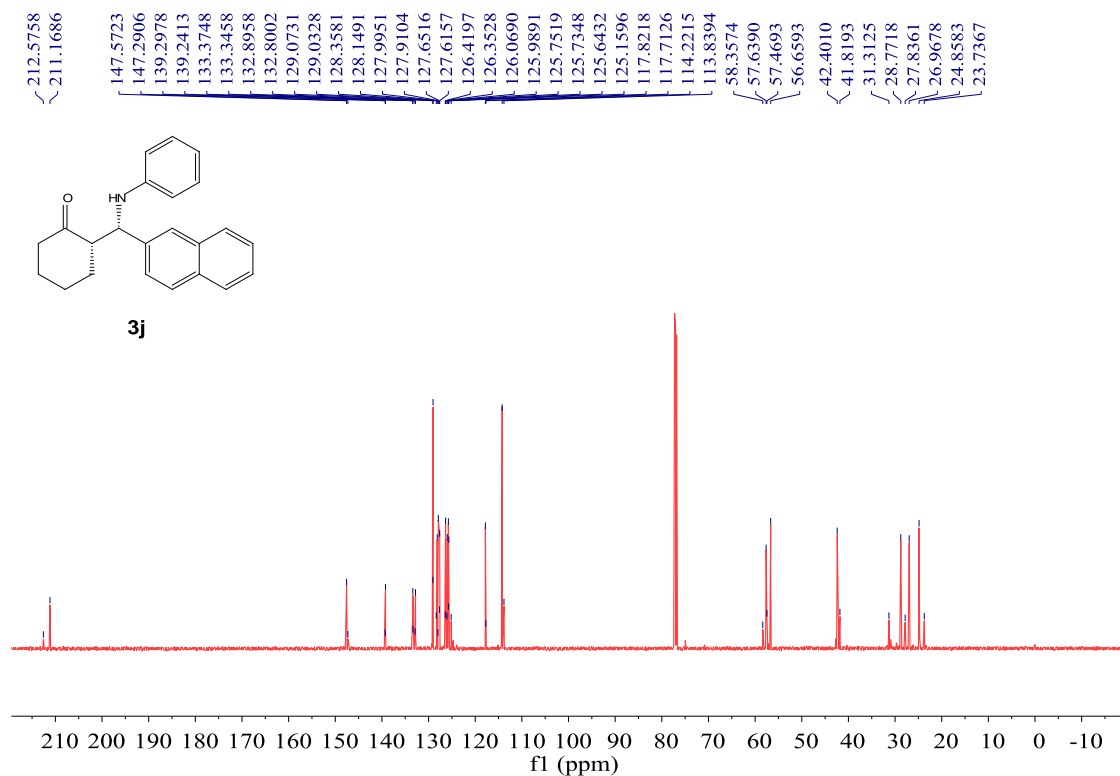

<sup>1</sup>H NMR Spectrum (600 MHz, CDCl<sub>3</sub>) of **3k**

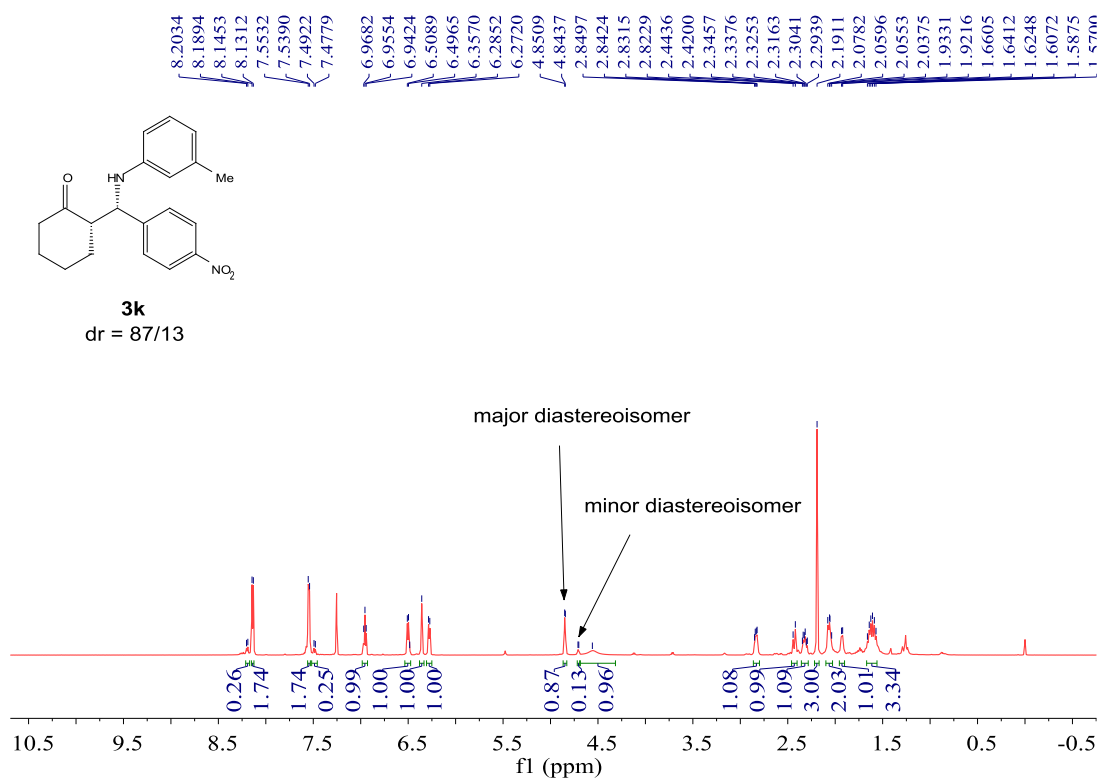

<sup>13</sup>C NMR Spectrum (151 MHz, CDCl<sub>3</sub>) of **3k**

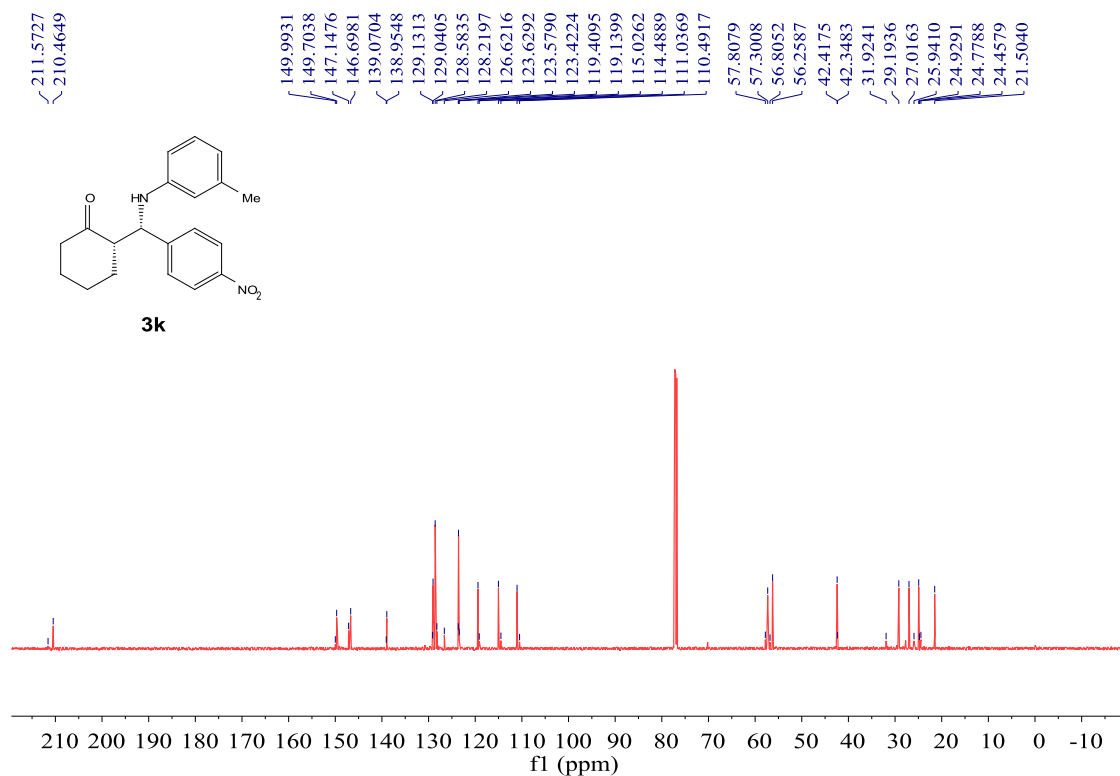

<sup>1</sup>H NMR Spectrum (600 MHz, CDCl<sub>3</sub>) of **3l**

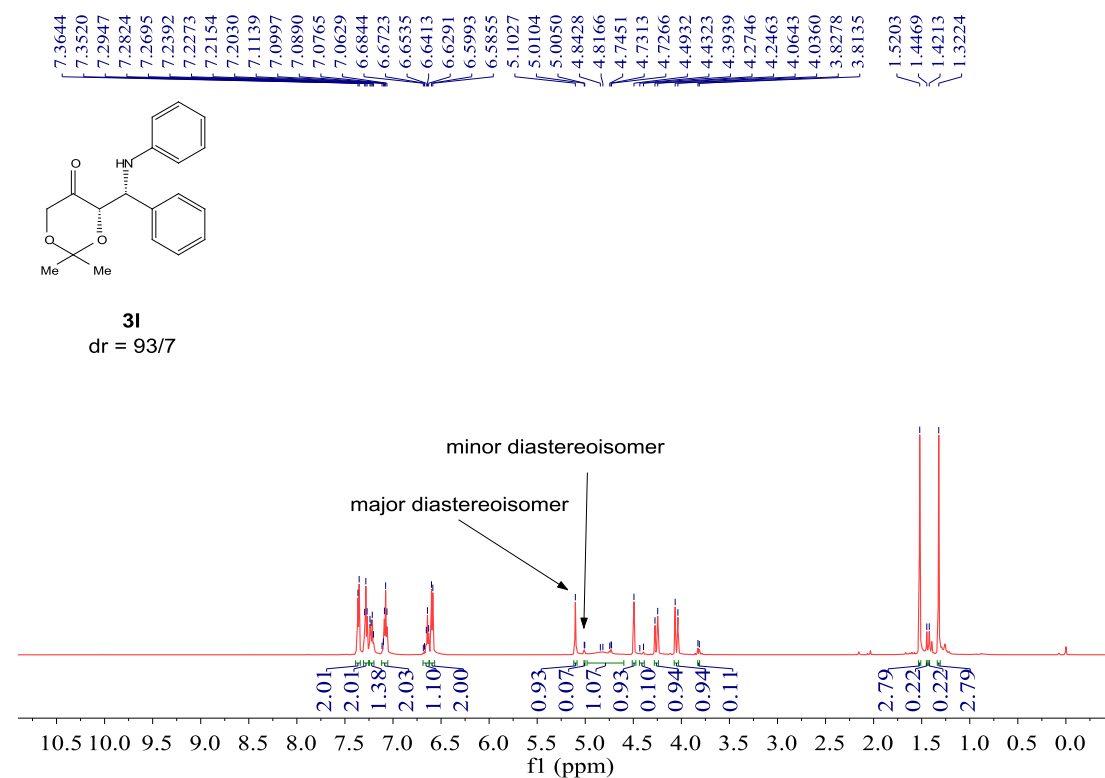

<sup>13</sup>C NMR Spectrum (151 MHz, CDCl<sub>3</sub>) of **3I**

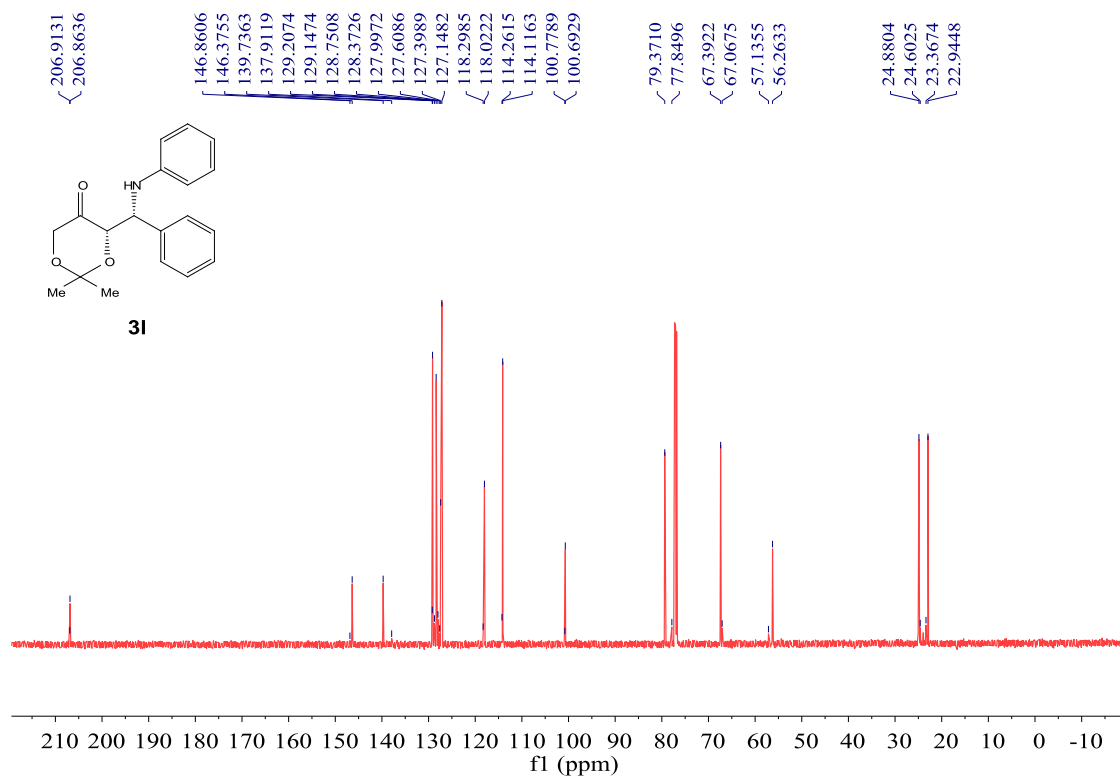

<sup>1</sup>H NMR Spectrum (600 MHz, CDCl<sub>3</sub>) of **5a**

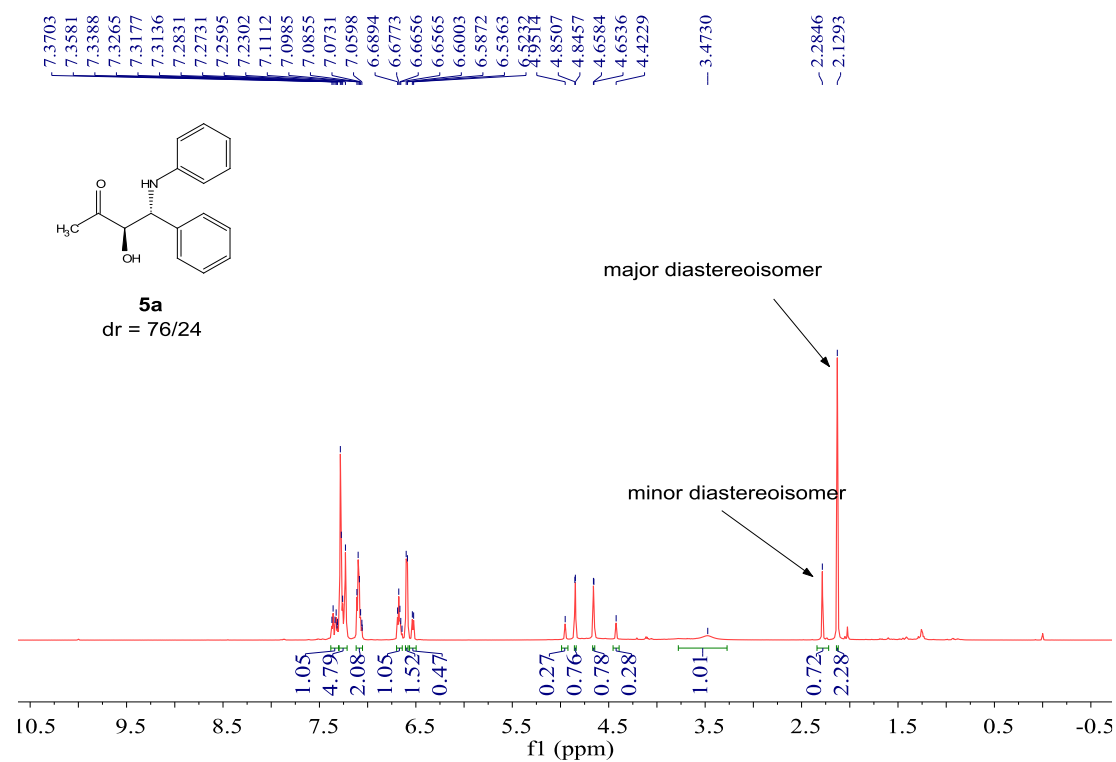

<sup>13</sup>C NMR Spectrum (151 MHz, CDCl<sub>3</sub>) of **5a**

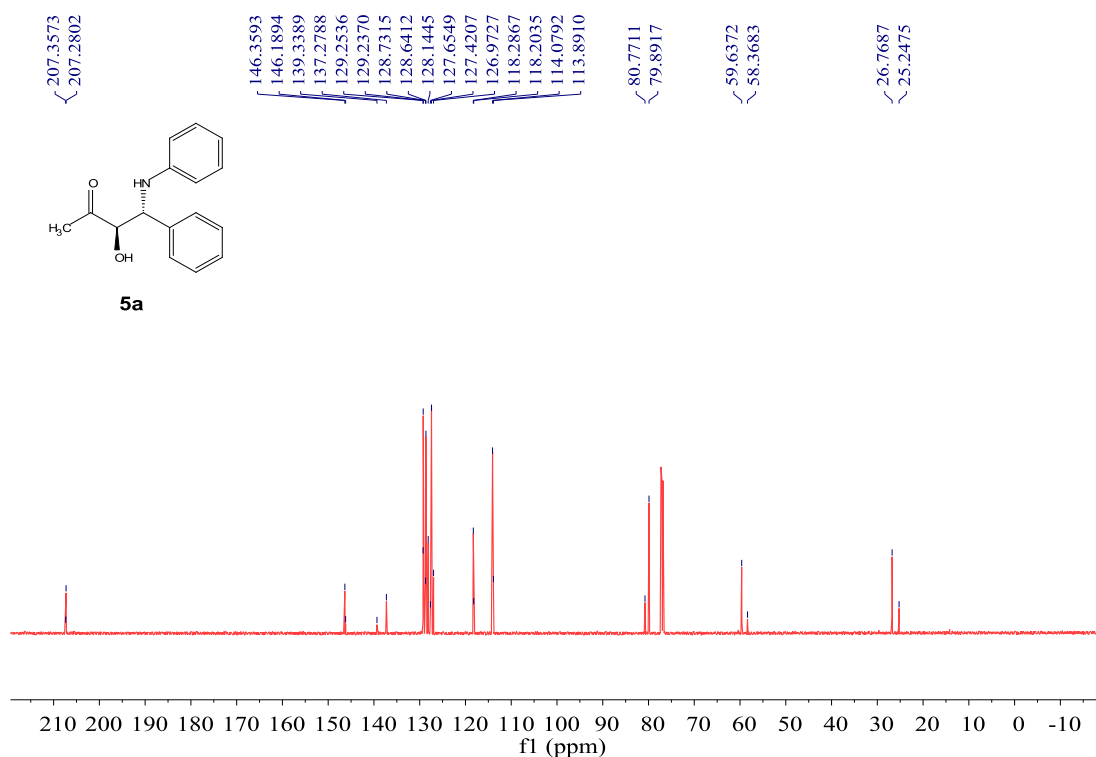

<sup>1</sup>H NMR Spectrum (600 MHz, CDCl<sub>3</sub>) of **5b**

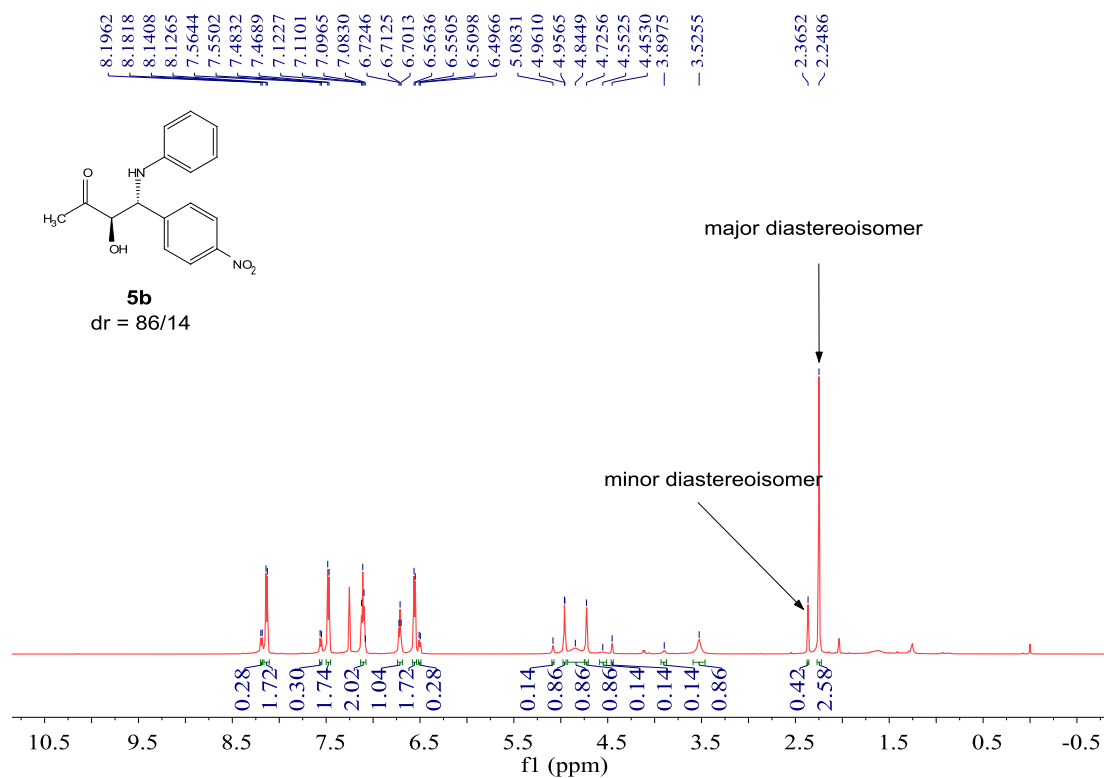

<sup>13</sup>C NMR Spectrum (151 MHz, CDCl<sub>3</sub>) of **5b**

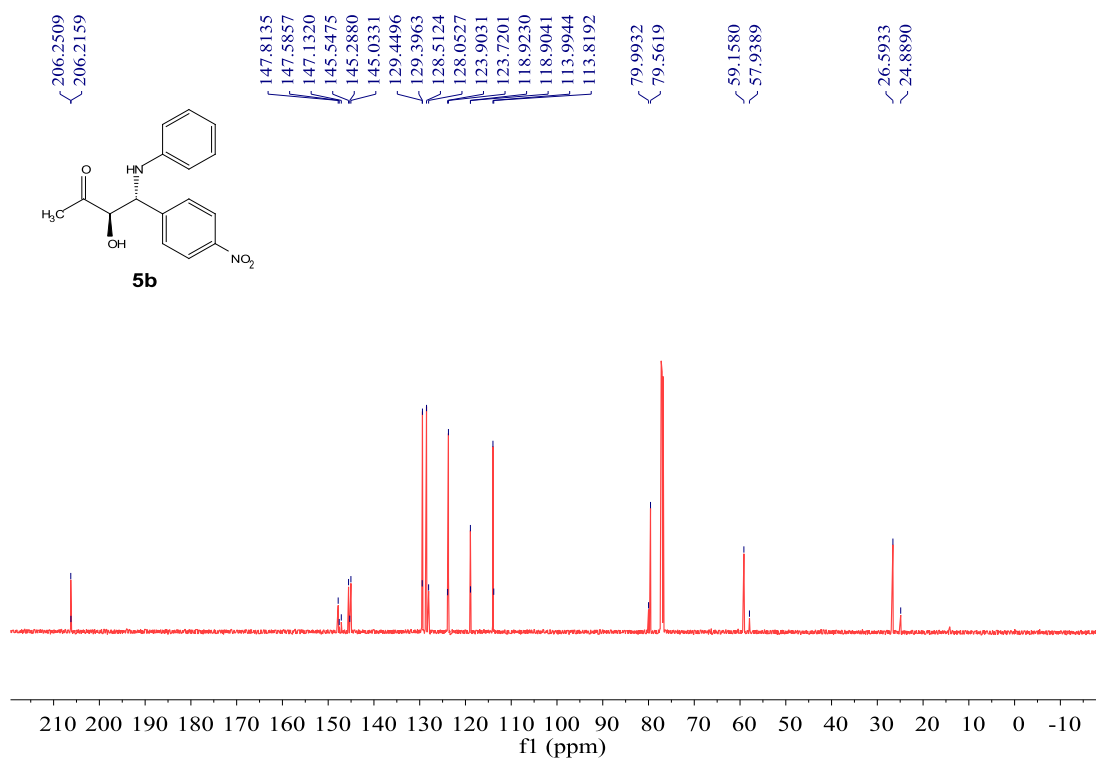

<sup>1</sup>H NMR Spectrum (400 MHz, CDCl<sub>3</sub>) of **5c**

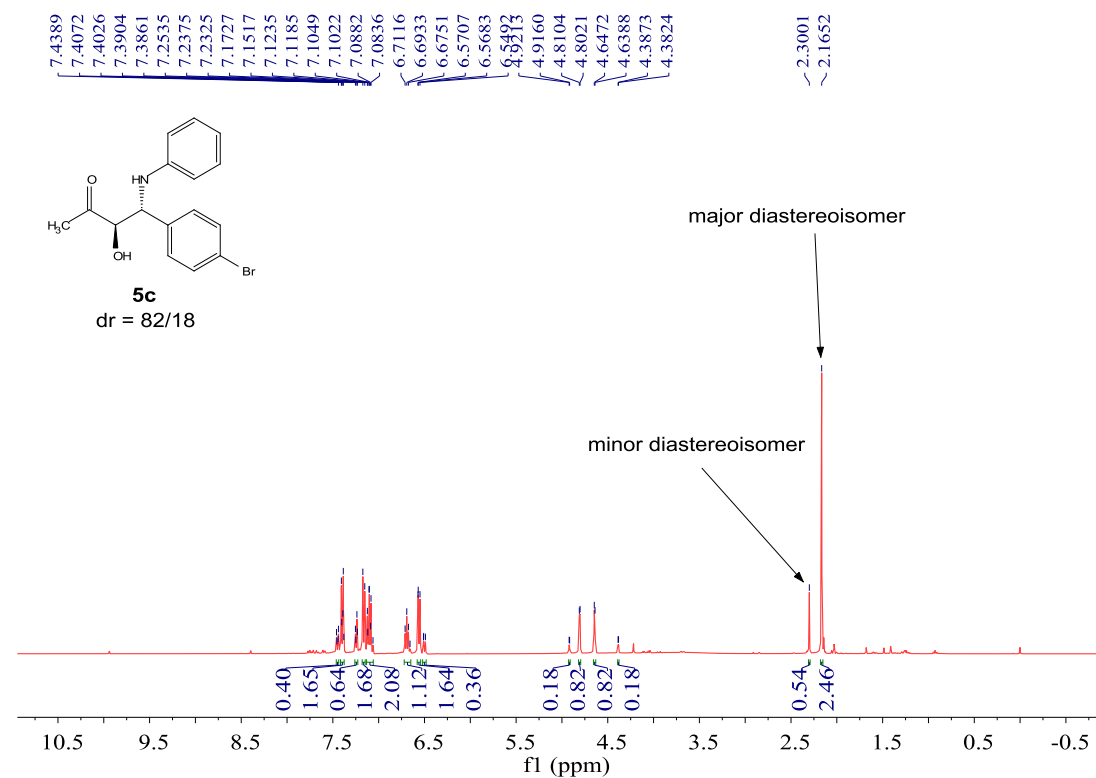

$^{13}\text{C}$  NMR Spectrum (101 MHz,  $\text{CDCl}_3$ ) of **5c**

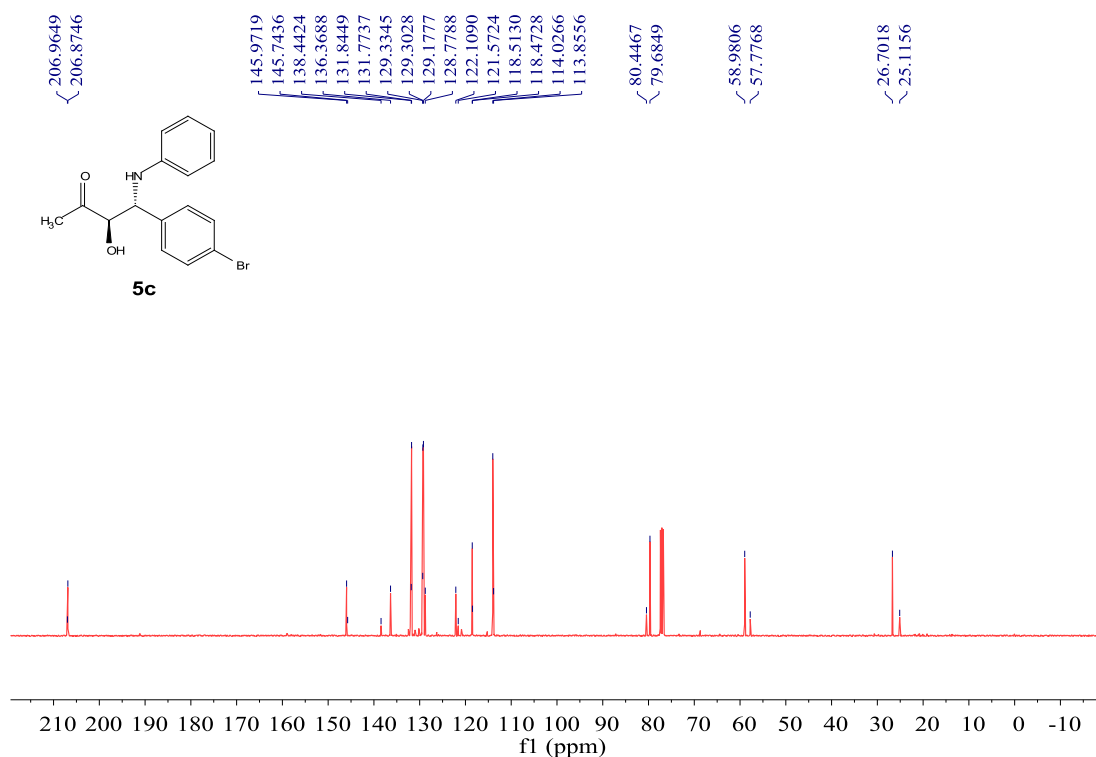

$^1\text{H}$  NMR Spectrum (600 MHz,  $\text{CDCl}_3$ ) of **5d**

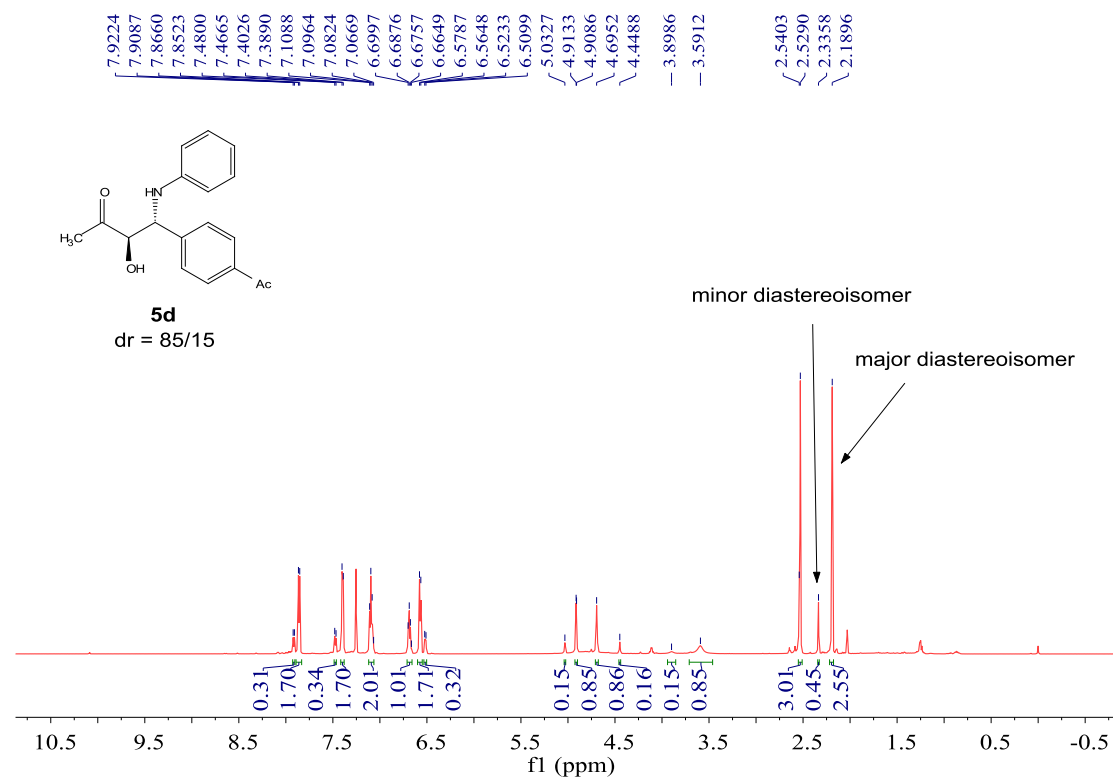

<sup>13</sup>C NMR Spectrum (151 MHz, CDCl<sub>3</sub>) of **5d**

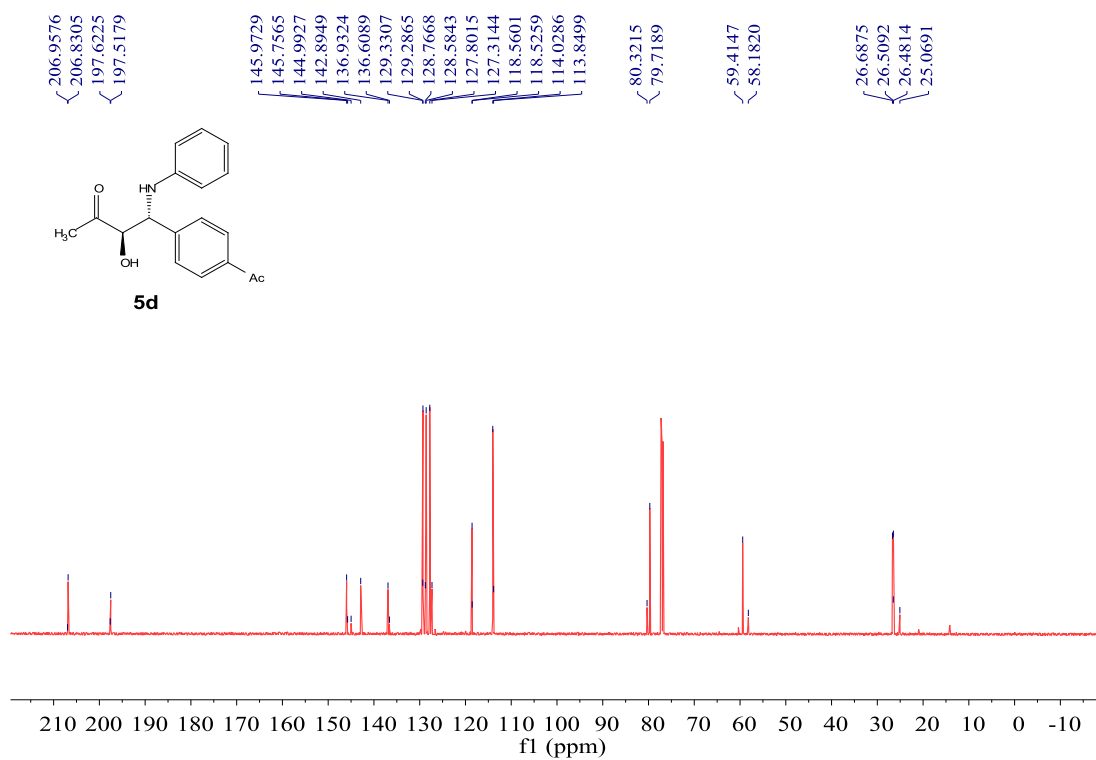

<sup>1</sup>H NMR Spectrum (600 MHz, CDCl<sub>3</sub>) of **5e**

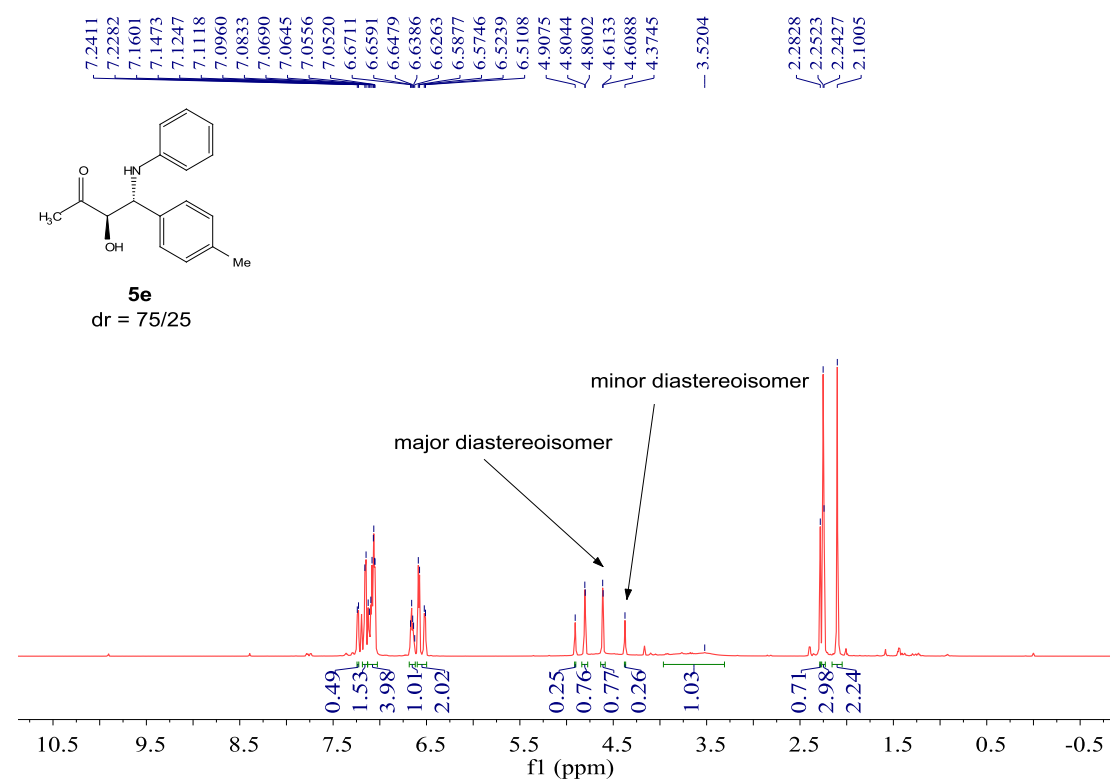



<sup>13</sup>C NMR Spectrum (151 MHz, CDCl<sub>3</sub>) of **5e**

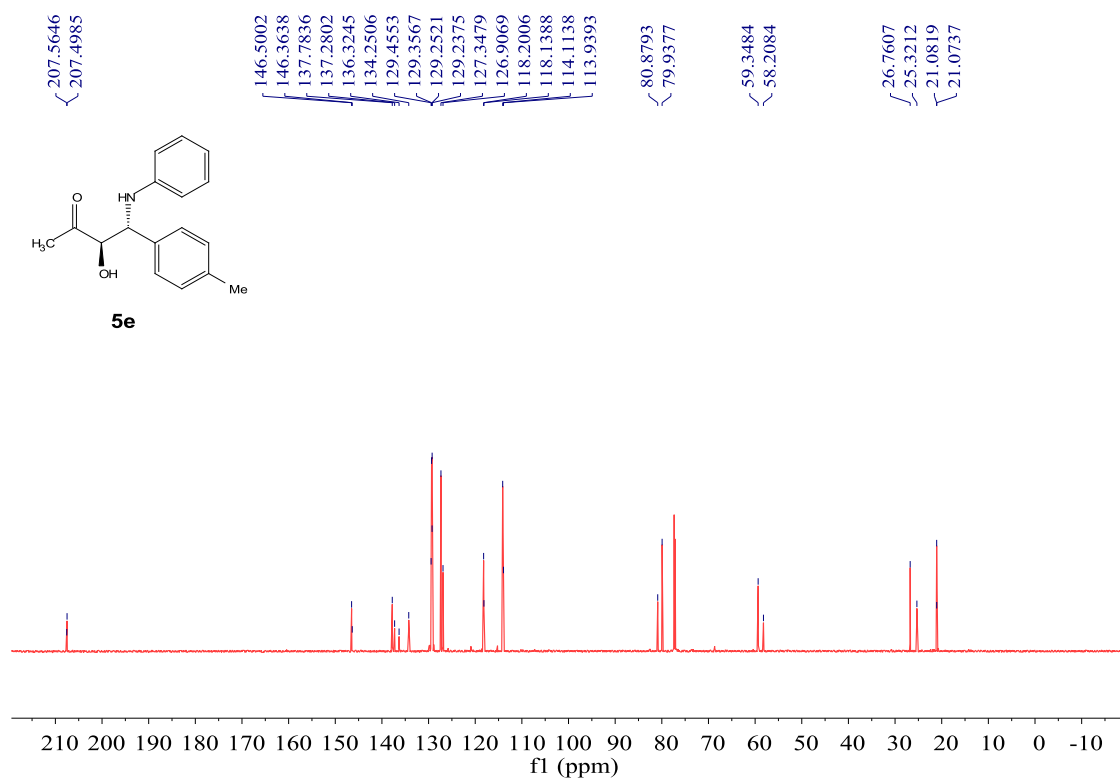

<sup>1</sup>H NMR Spectrum (400 MHz, CDCl<sub>3</sub>) of **5f**

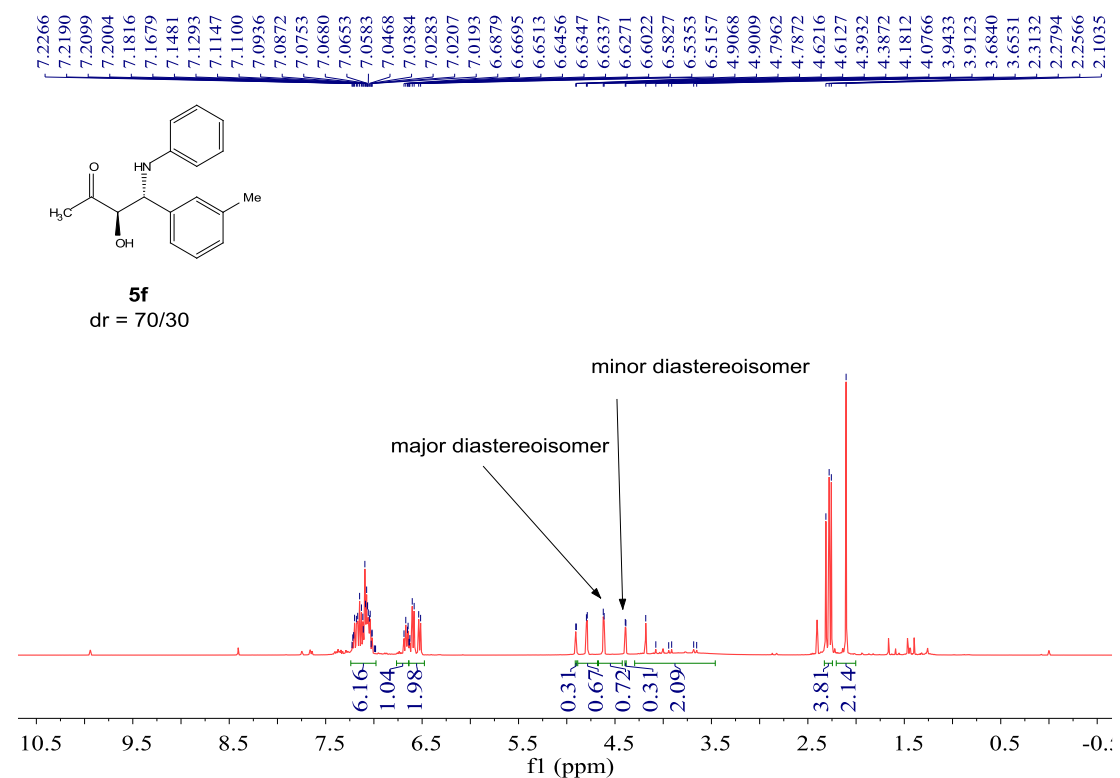

<sup>13</sup>C NMR Spectrum (101 MHz, CDCl<sub>3</sub>) of **5f**

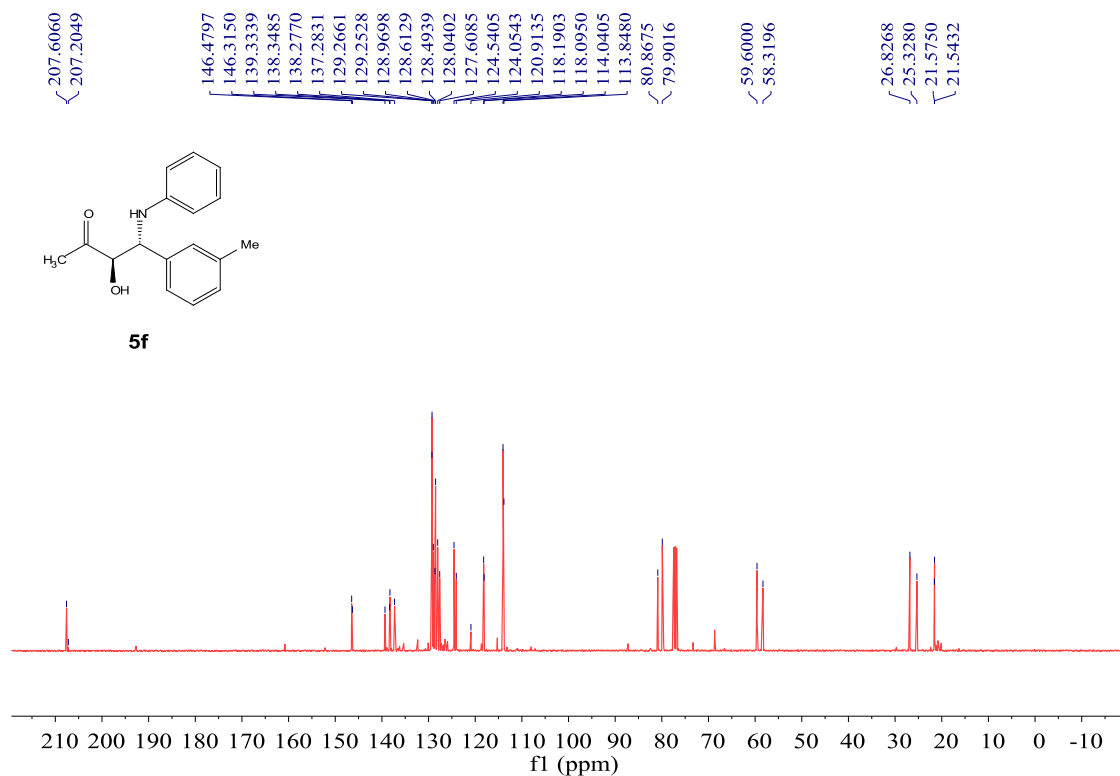

<sup>1</sup>H NMR Spectrum (400 MHz, CDCl<sub>3</sub>) of **5g**

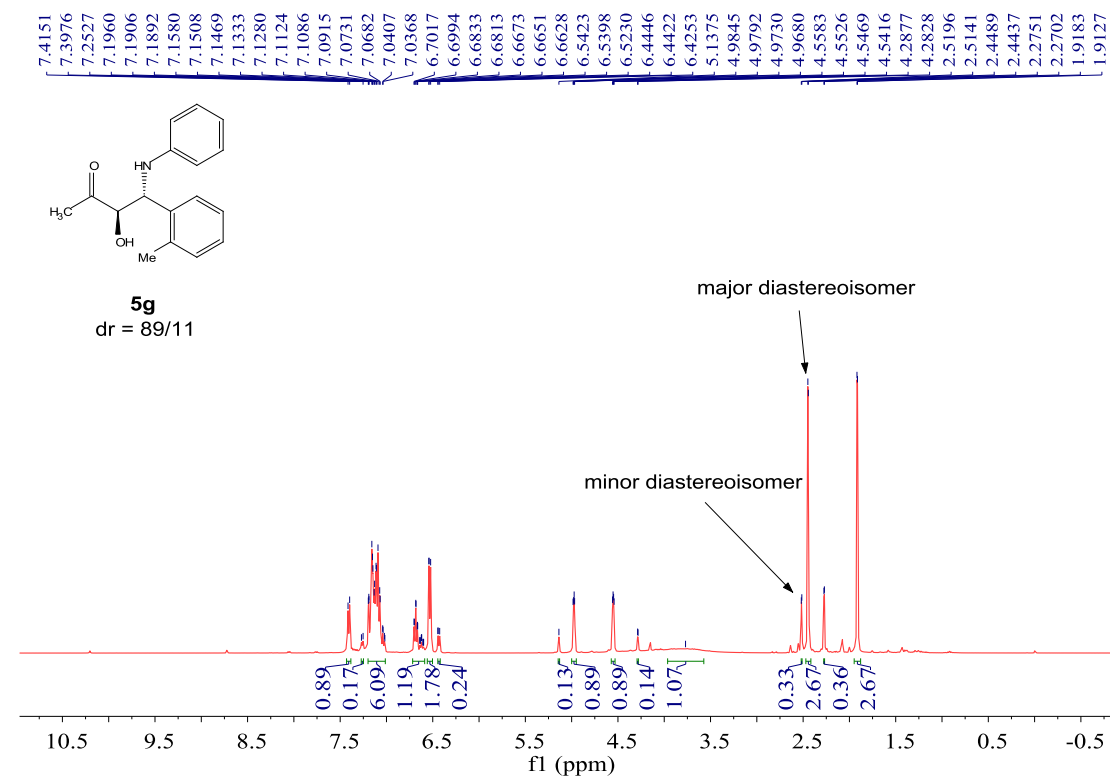

<sup>13</sup>C NMR Spectrum (101 MHz, CDCl<sub>3</sub>) of **5g**

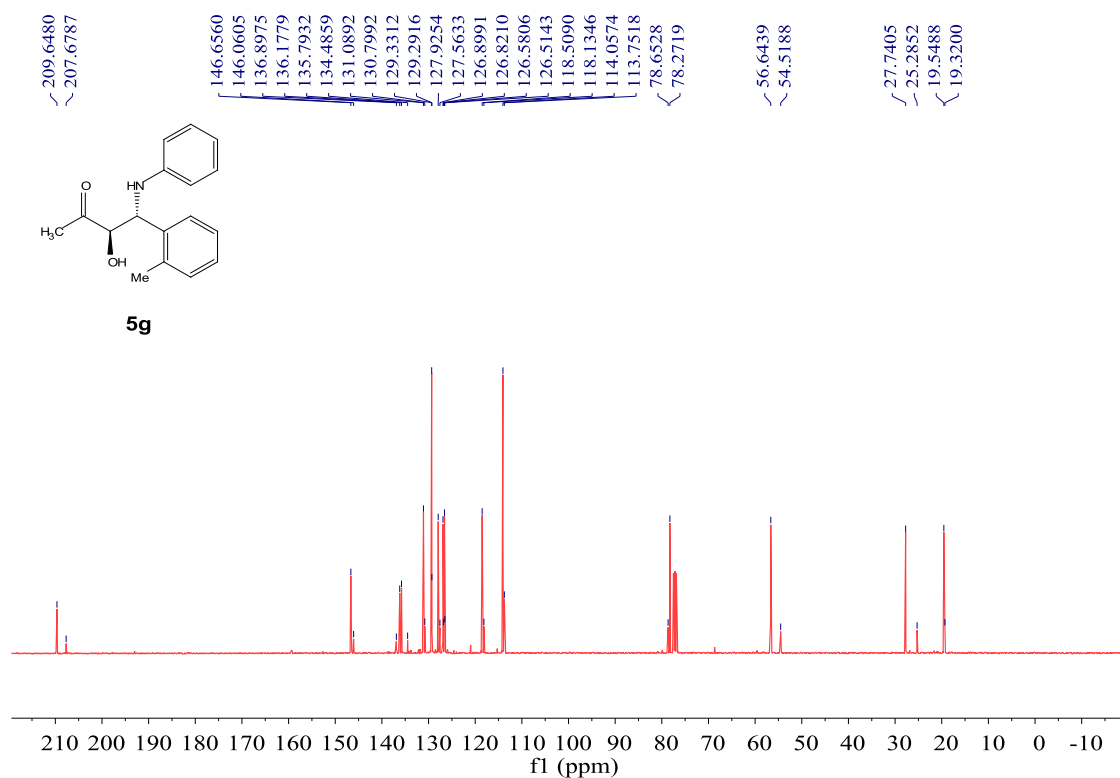

<sup>1</sup>H NMR Spectrum (600 MHz, CDCl<sub>3</sub>) of **5h**

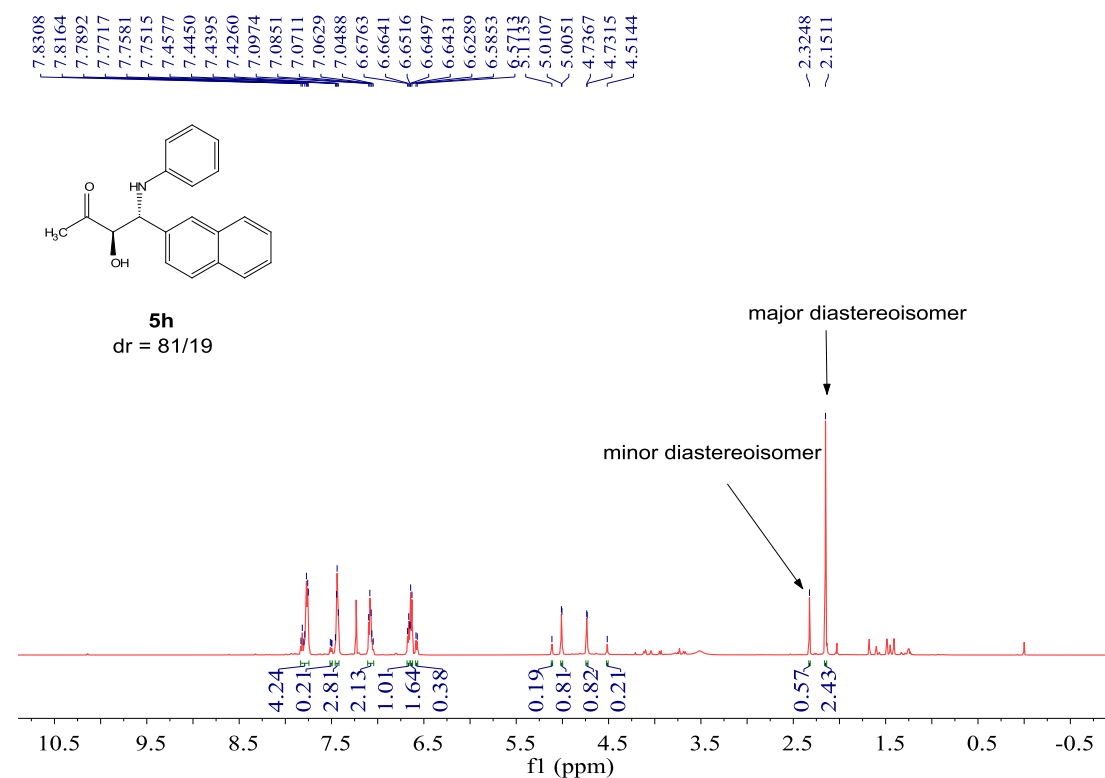

<sup>13</sup>C NMR Spectrum (151 MHz, CDCl<sub>3</sub>) of **5h**

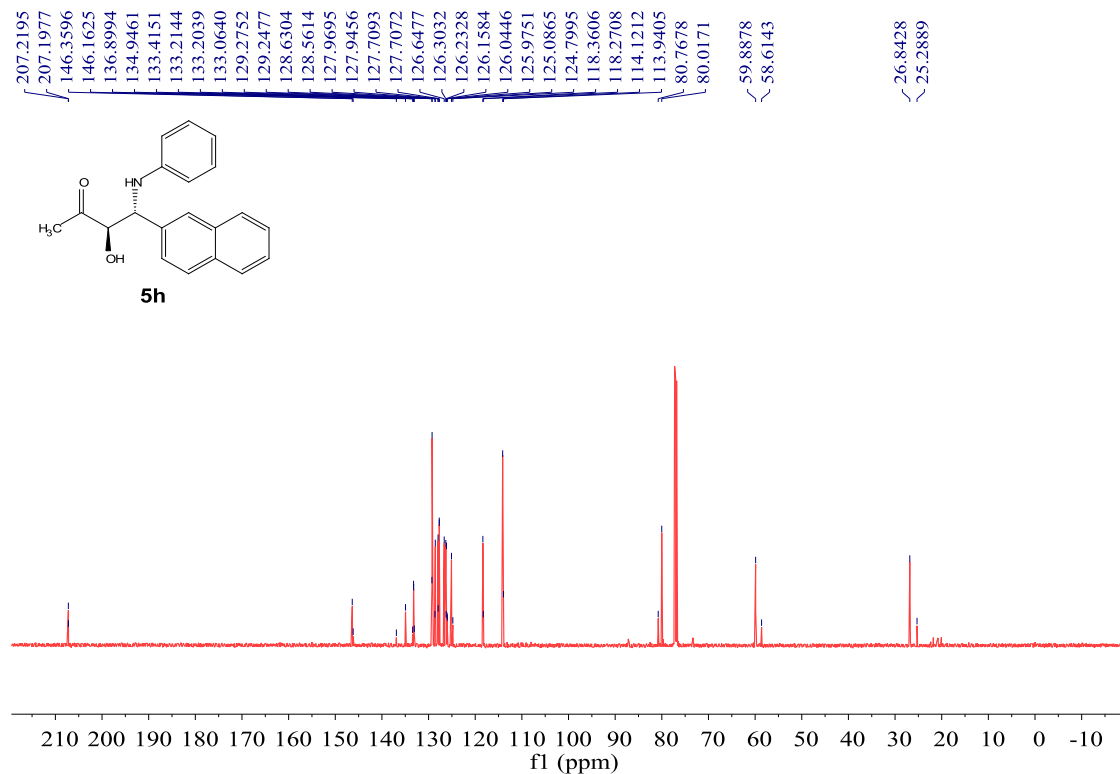

<sup>1</sup>H NMR Spectrum (400 MHz, CDCl<sub>3</sub>) of **5i**

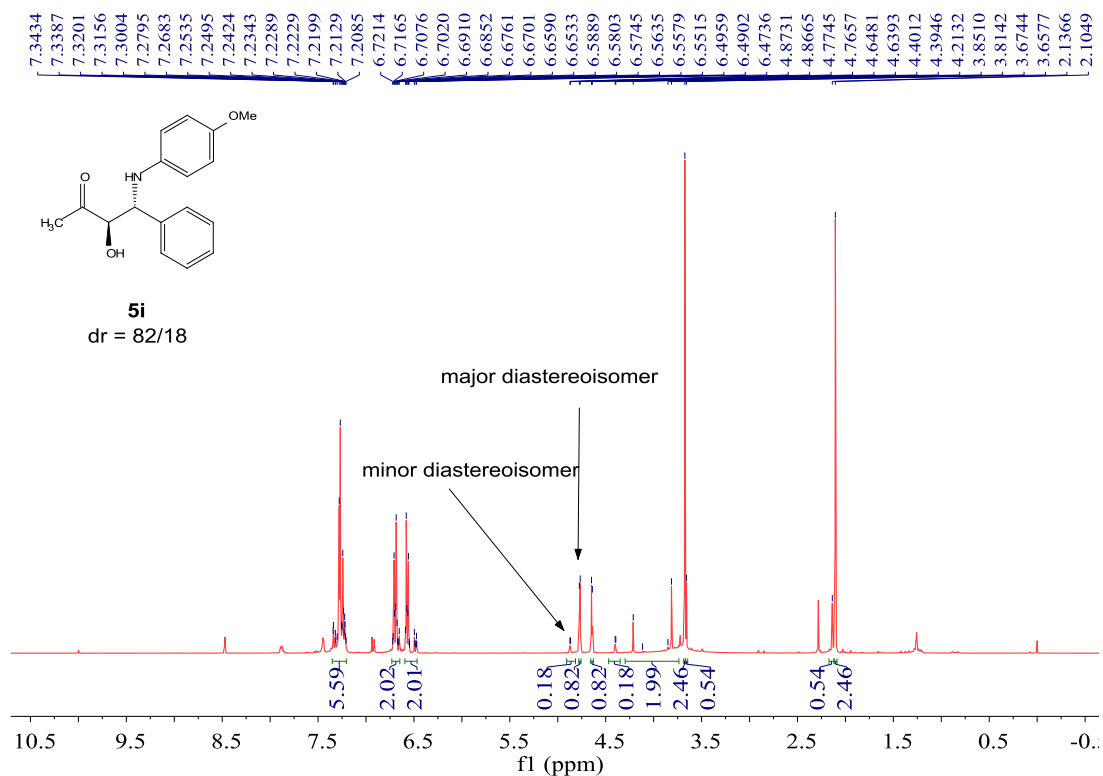

<sup>13</sup>C NMR Spectrum (101 MHz, CDCl<sub>3</sub>) of **5i**

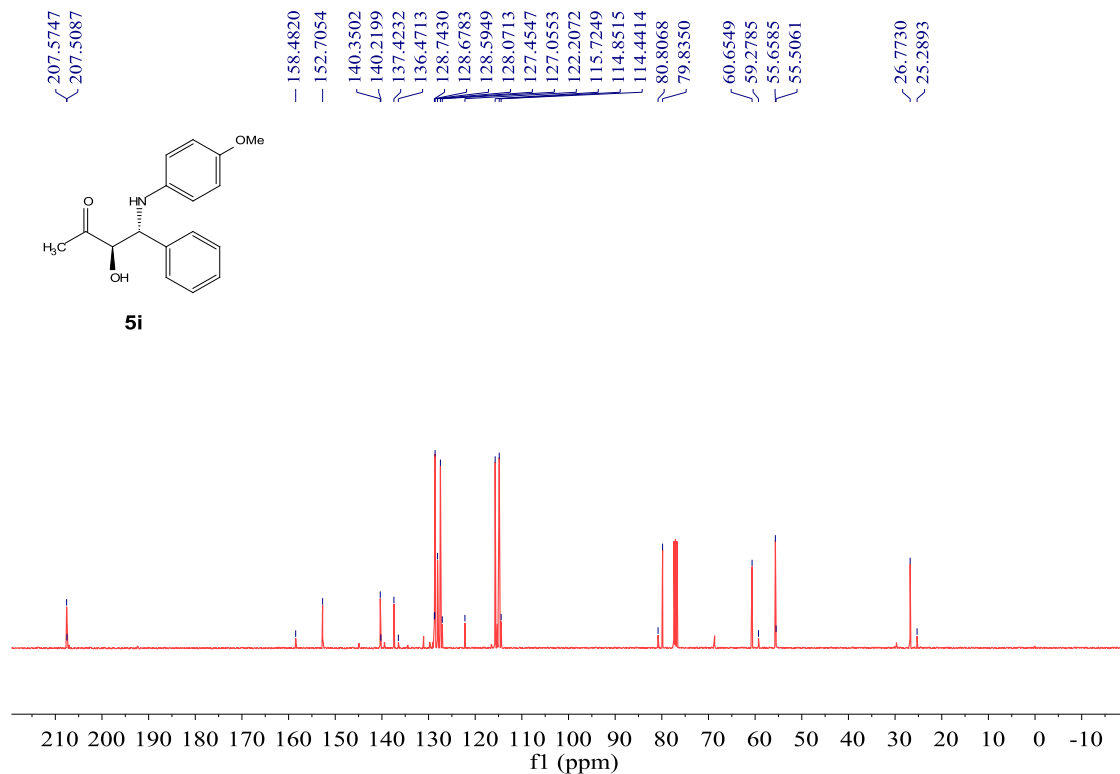

<sup>1</sup>H NMR Spectrum (400 MHz, CDCl<sub>3</sub>) of **5j**

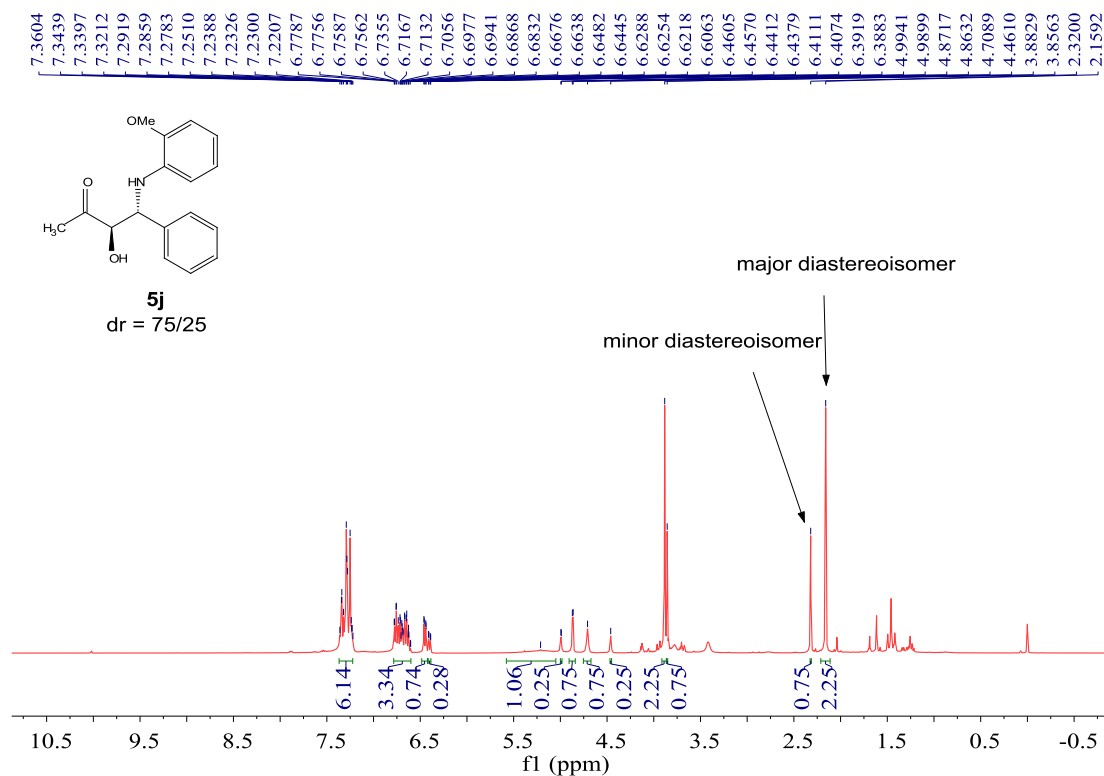

<sup>13</sup>C NMR Spectrum (101 MHz, CDCl<sub>3</sub>) of **5j**

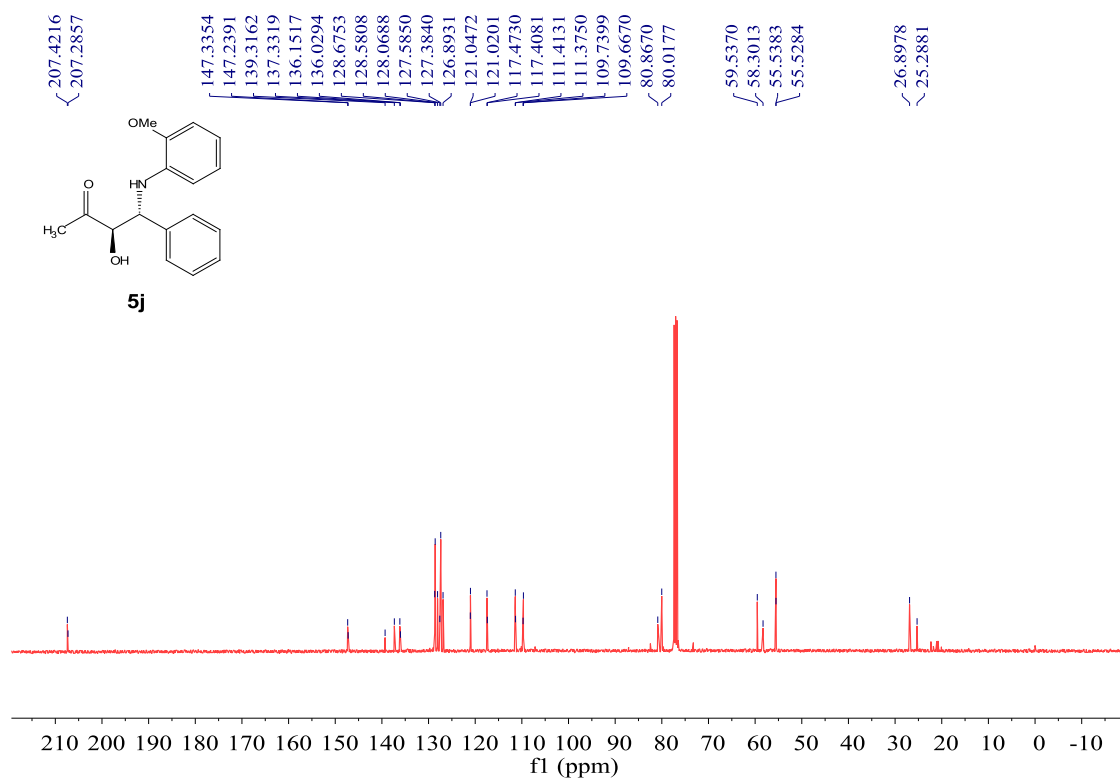

<sup>1</sup>H NMR Spectrum (600 MHz, CDCl<sub>3</sub>) of **5k**

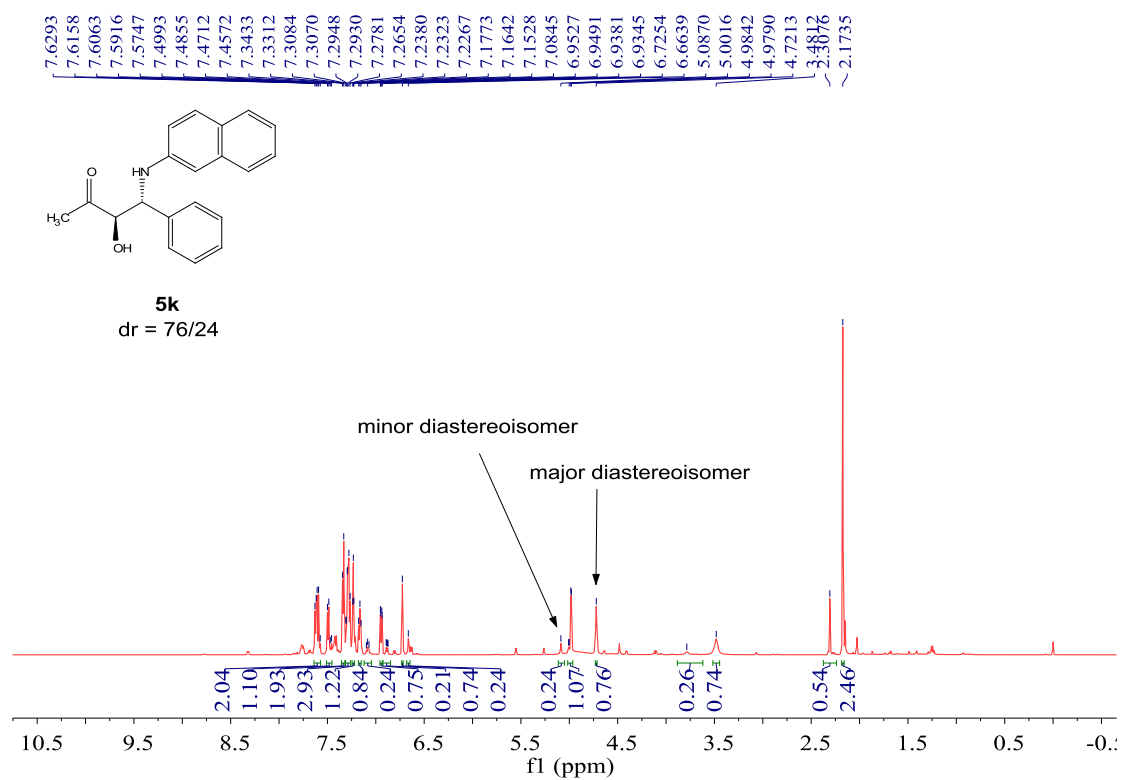

<sup>13</sup>C NMR Spectrum (151 MHz, CDCl<sub>3</sub>) of **5k**

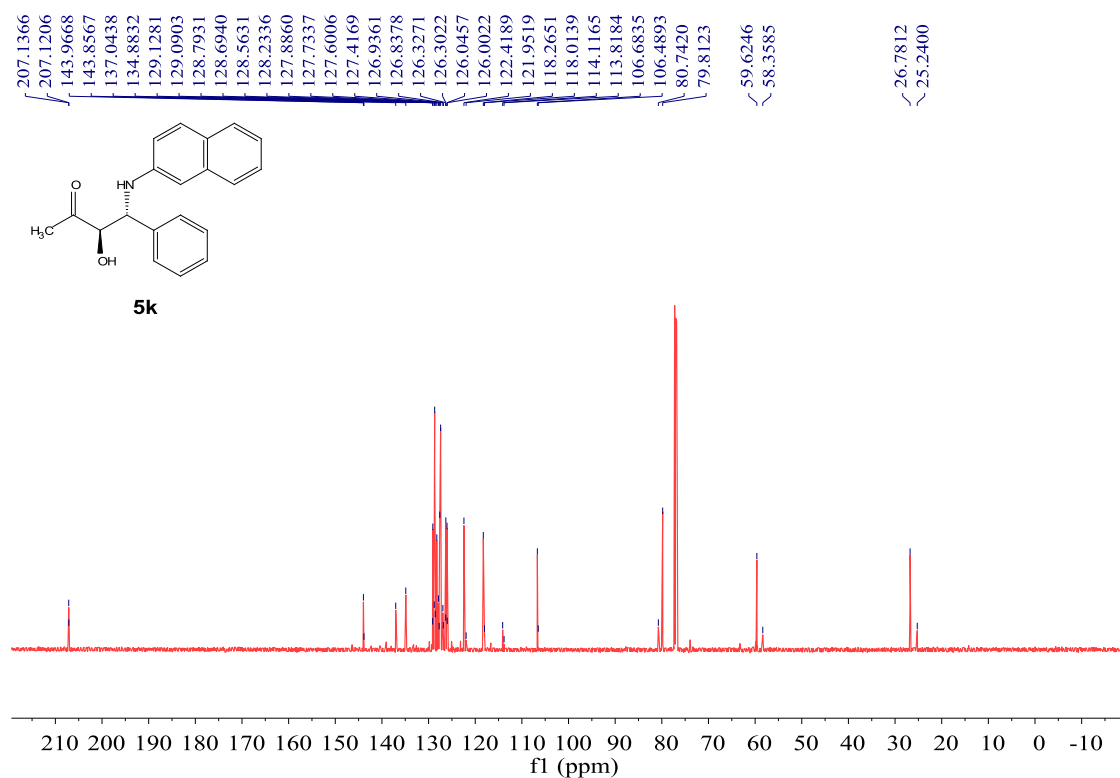

<sup>1</sup>H NMR Spectrum (600 MHz, CDCl<sub>3</sub>) of **5l**

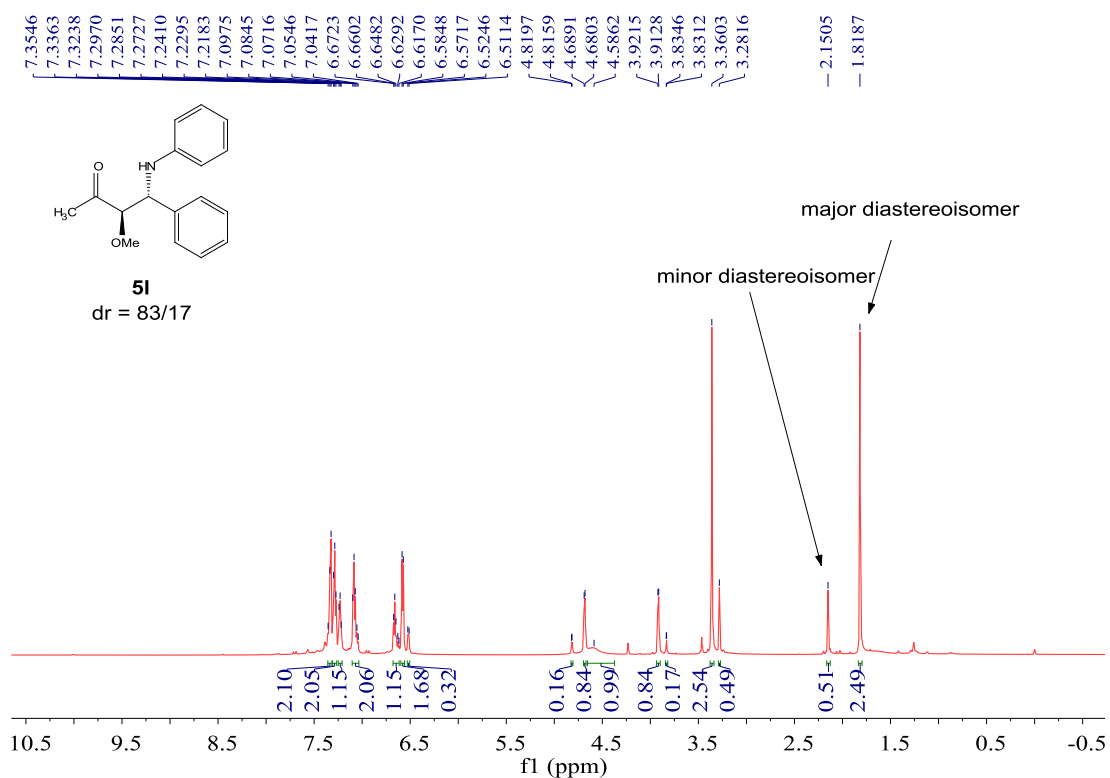

<sup>13</sup>C NMR Spectrum (151 MHz, CDCl<sub>3</sub>) of **5l**

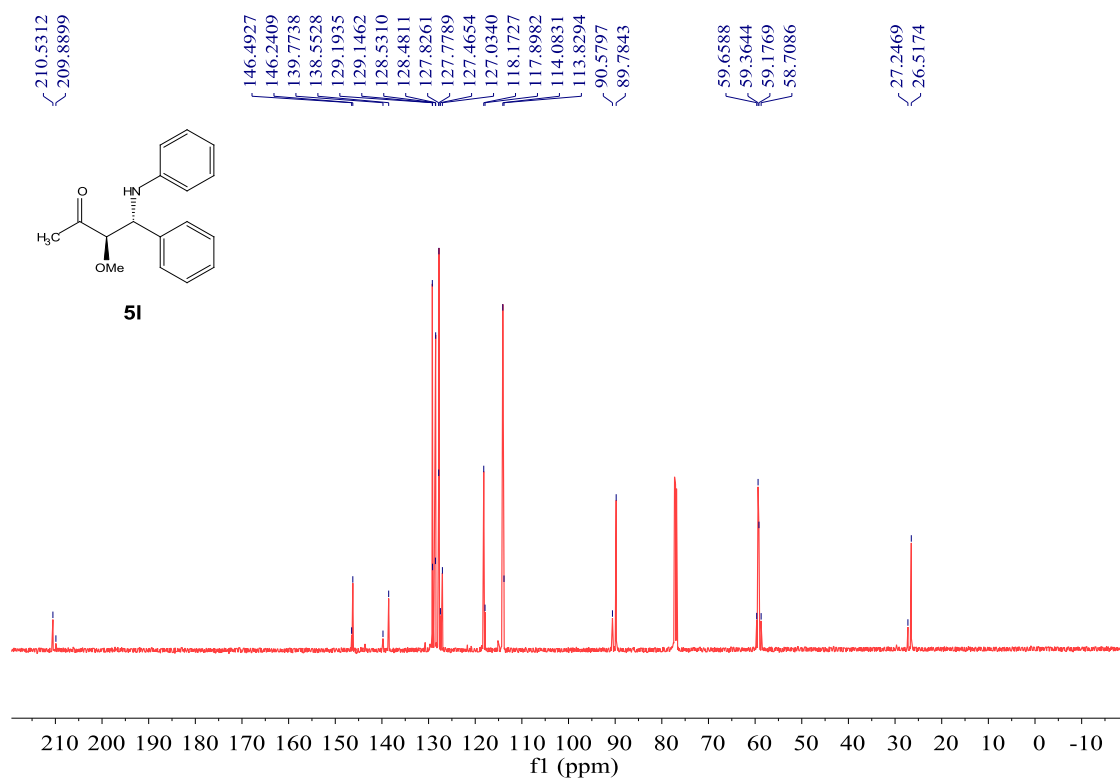

<sup>1</sup>H NMR Spectrum (600 MHz, CDCl<sub>3</sub>) of **5m**

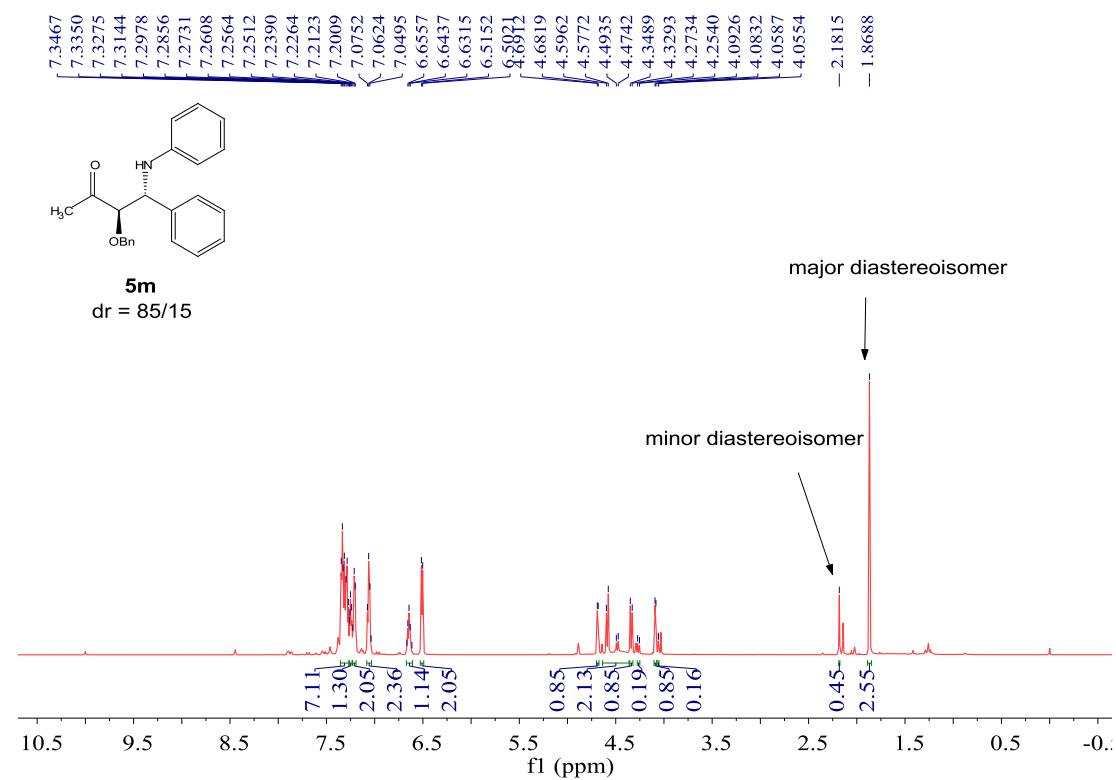



<sup>13</sup>C NMR Spectrum (151 MHz, CDCl<sub>3</sub>) of **5m**

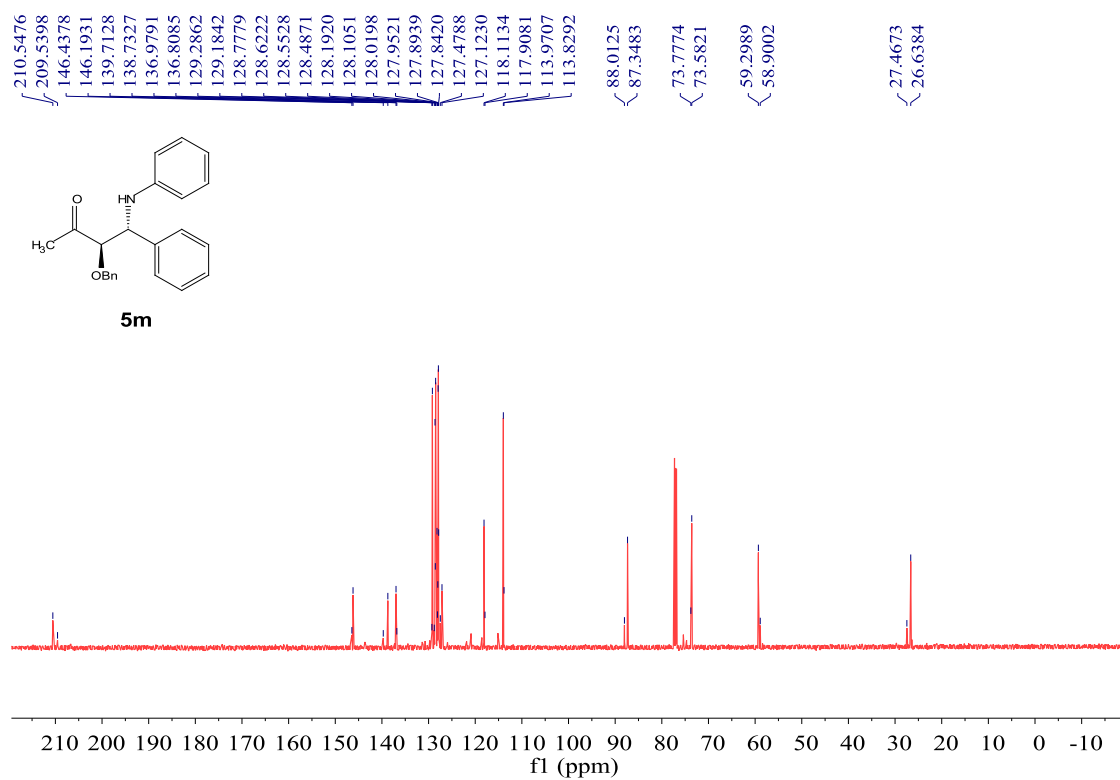

## 14. HRMS spectra

HRMS spectrum of **3c**

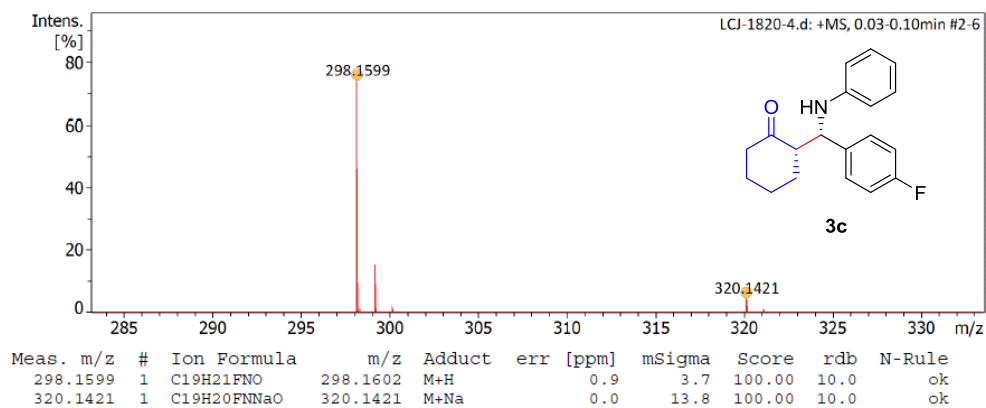

HRMS spectrum of **3e**

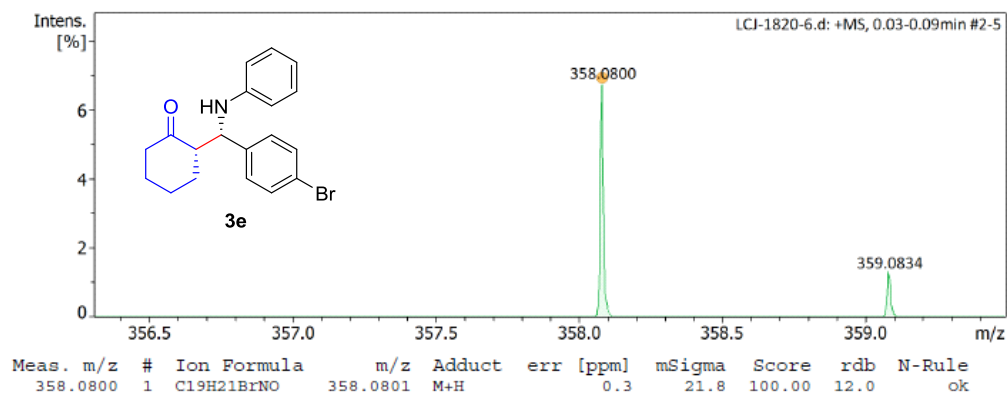

HRMS spectrum of **3f**

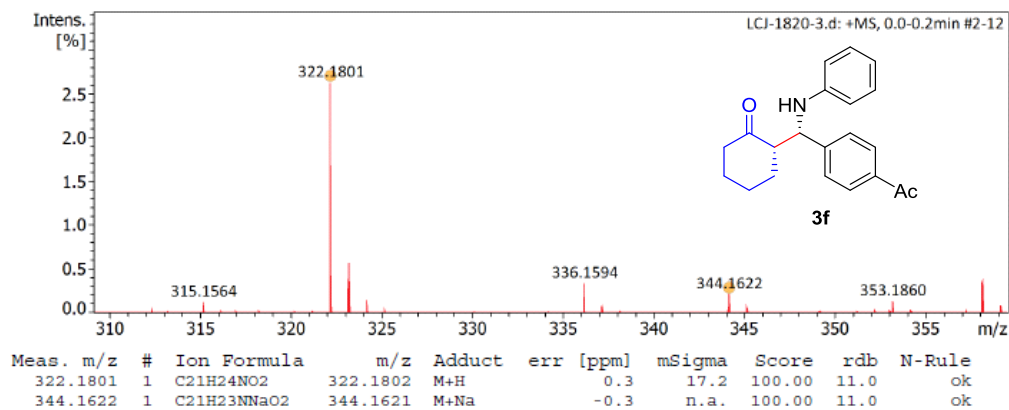

### HRMS spectrum of **3l**

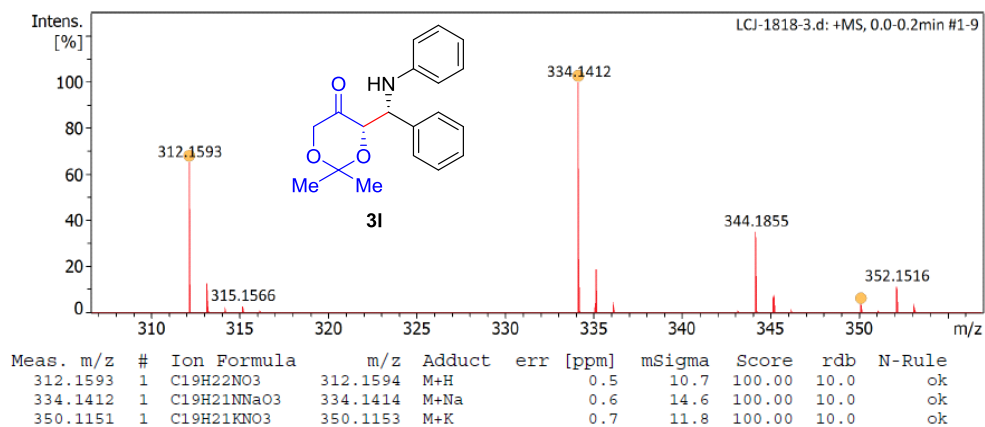

### HRMS spectrum of **5c**

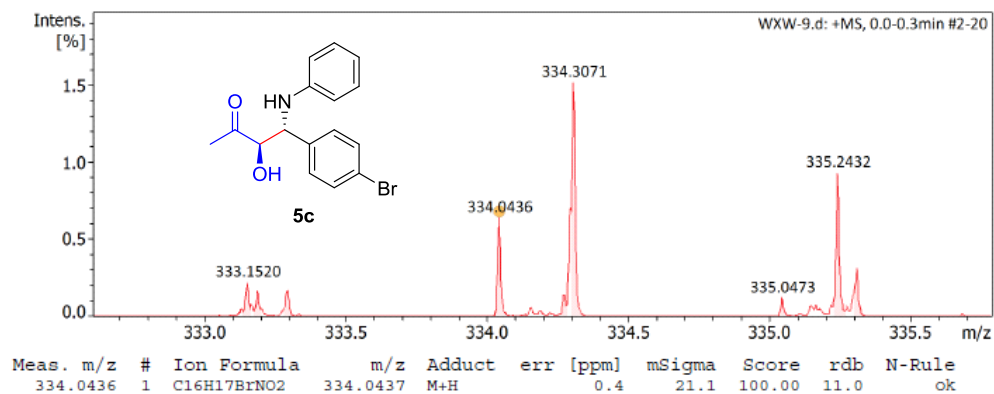

### HRMS spectrum of **5d**

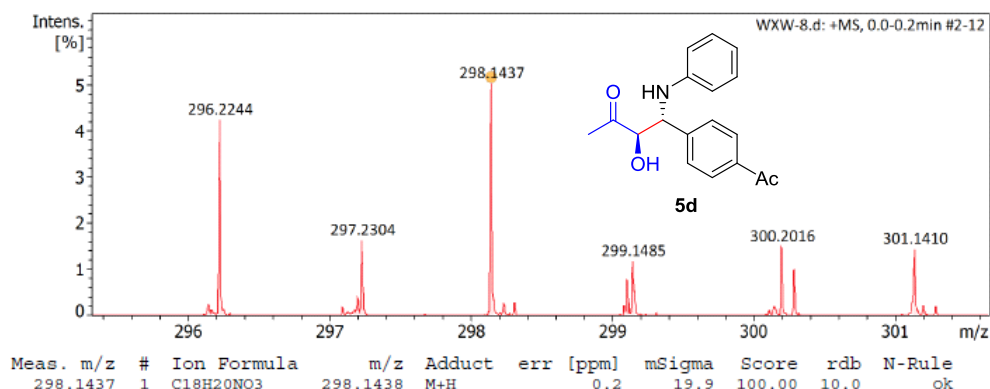

HRMS spectrum of **5e**

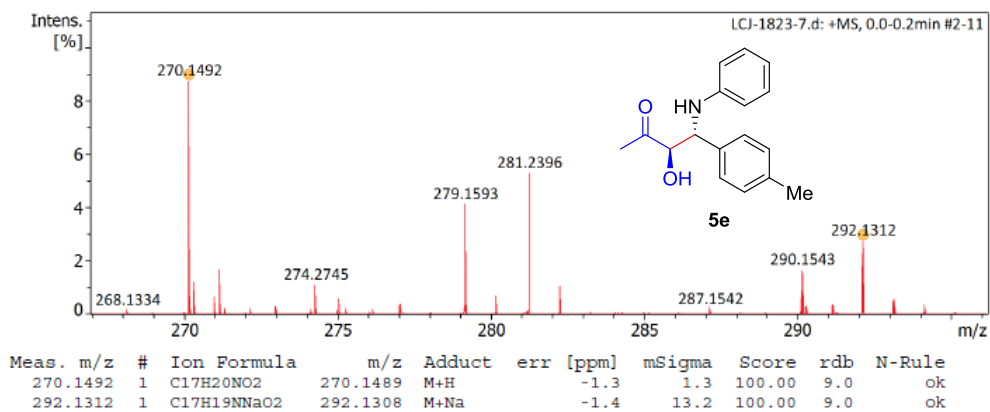

HRMS spectrum of **5f**

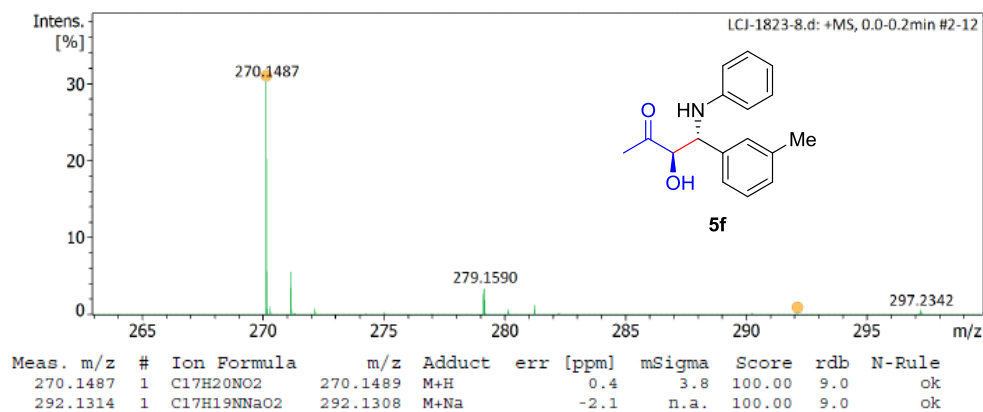

HRMS spectrum of **5g**

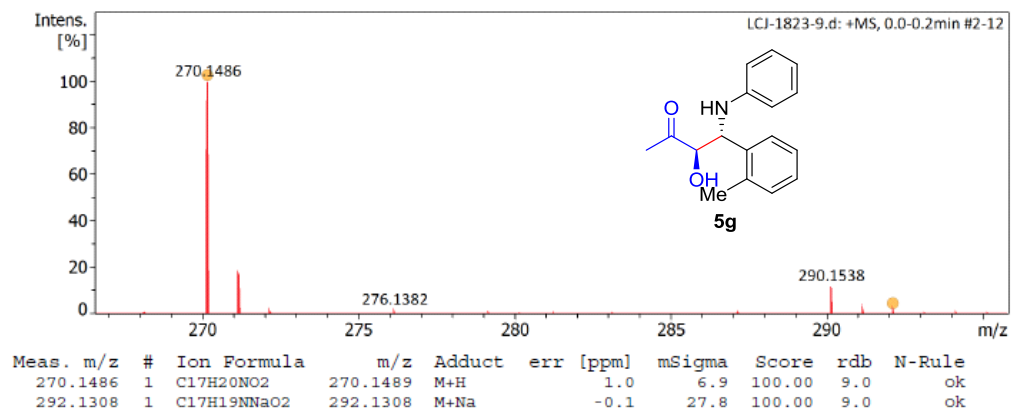

HRMS spectrum of **5h**

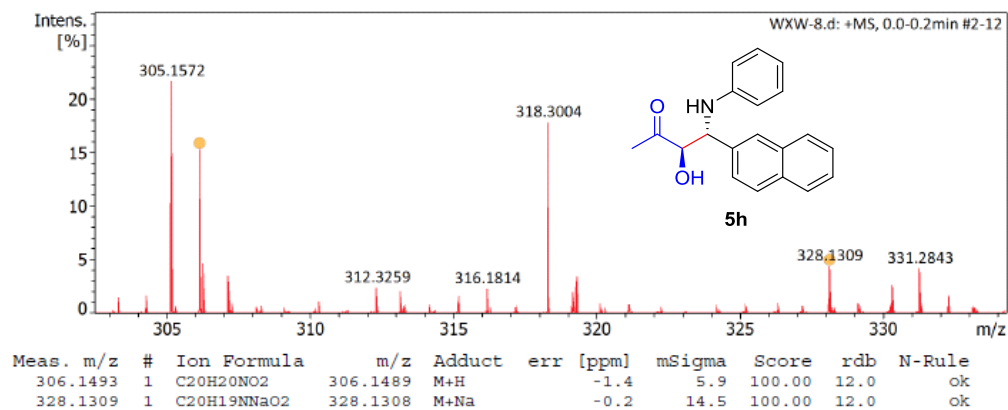

HRMS spectrum of **5j**

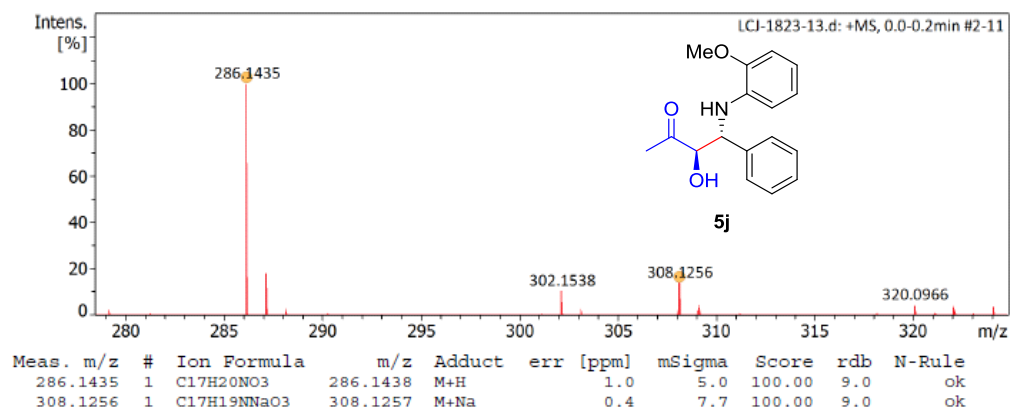

HRMS spectrum of **5k**

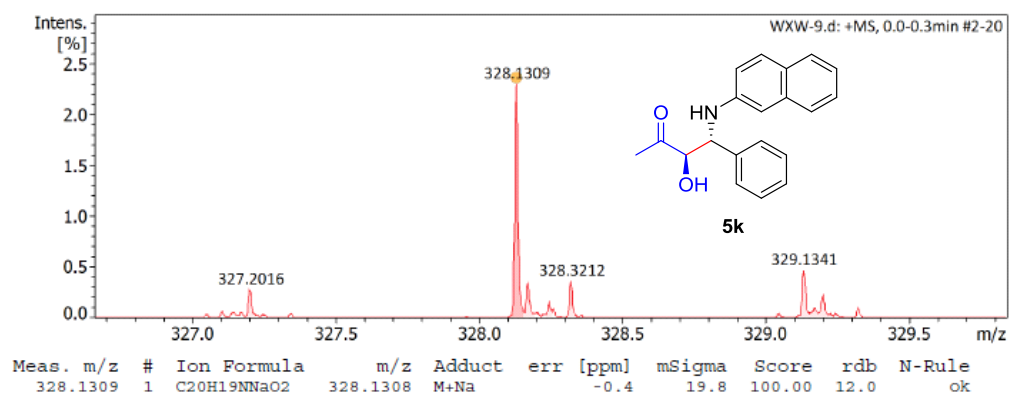

HRMS spectrum of **5l**

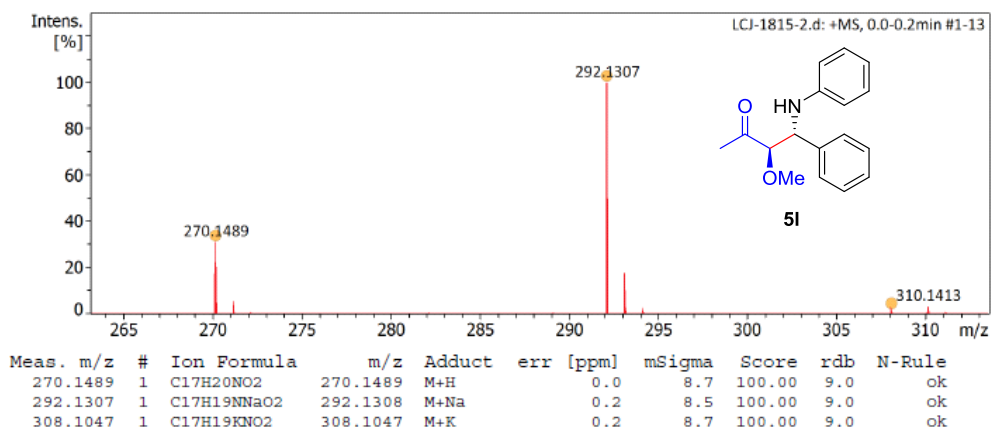

HRMS spectrum of **5m**

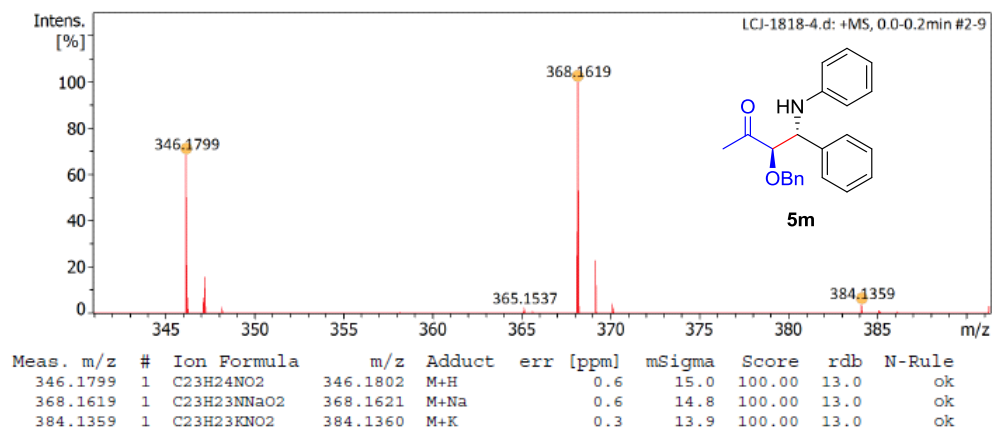

## 15. Chiral HPLC spectra

### HPLC spectrum of *Rac-3a*

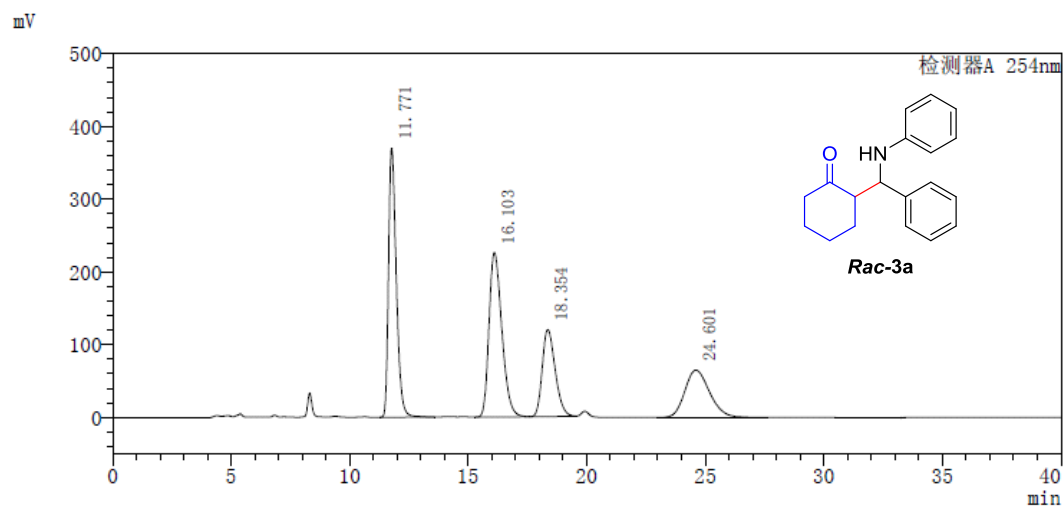

检测器A 254nm

| No. | Retention Time | Area     | Height | Concentration |
|-----|----------------|----------|--------|---------------|
| 1   | 11.771         | 8401948  | 369500 | 32.159        |
| 2   | 16.103         | 8477829  | 225903 | 32.450        |
| 3   | 18.354         | 4537721  | 119703 | 17.369        |
| 4   | 24.601         | 4708447  | 64951  | 18.022        |
| 总计  |                | 26125945 | 780058 |               |

### HPLC spectrum of **3a**

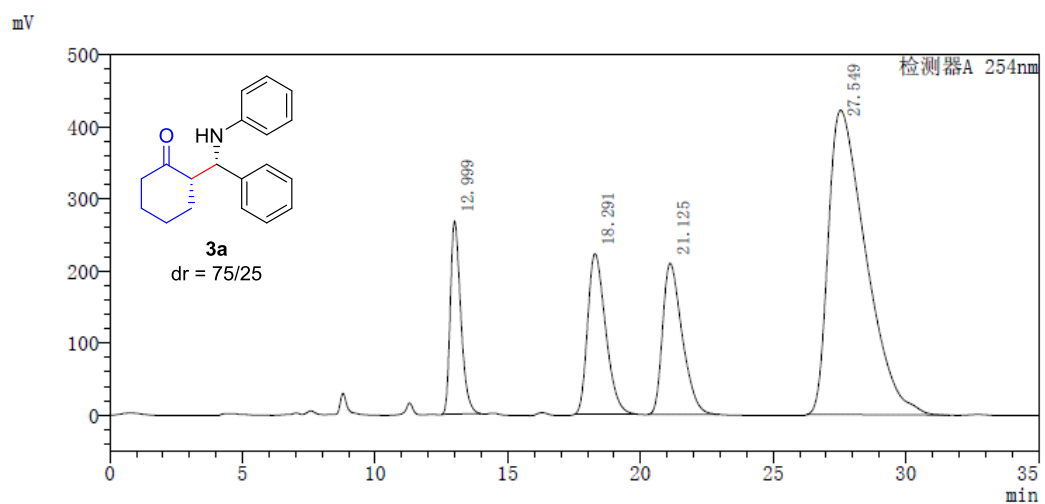

检测器A 254nm

| No. | Retention Time | Area     | Height  | Concentration |
|-----|----------------|----------|---------|---------------|
| 1   | 12.999         | 7337657  | 267309  | 10.459        |
| 2   | 18.291         | 10543487 | 222899  | 15.029        |
| 3   | 21.125         | 10767896 | 209409  | 15.349        |
| 4   | 27.549         | 41505024 | 422224  | 59.163        |
| 总计  |                | 70154064 | 1121840 |               |

### HPLC spectrum of *Rac-3b*

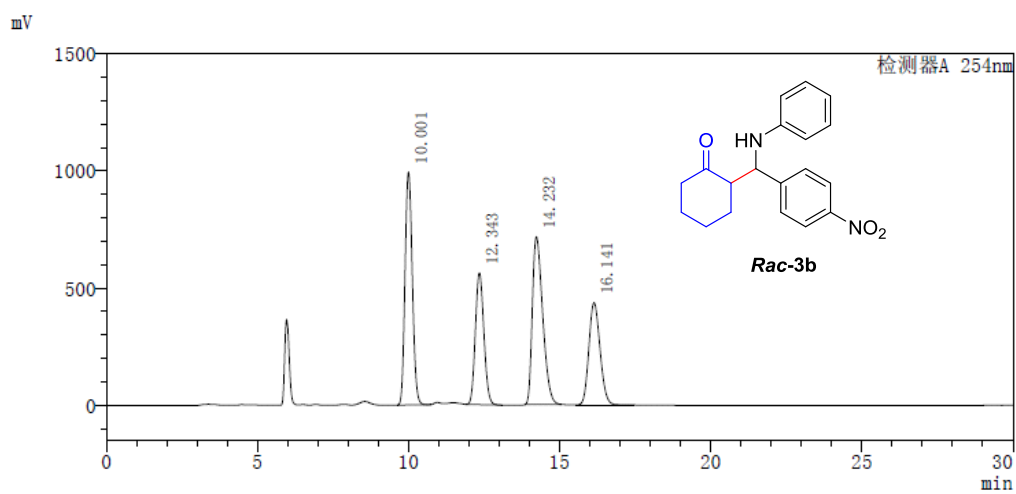

检测器A 254nm

| No. | Retention Time | Area     | Height  | Concentration |
|-----|----------------|----------|---------|---------------|
| 1   | 10.001         | 16667518 | 993202  | 29.763        |
| 2   | 12.343         | 11040677 | 561966  | 19.715        |
| 3   | 14.232         | 17073650 | 716308  | 30.488        |
| 4   | 16.141         | 11218819 | 436171  | 20.033        |
| 总计  |                | 56000663 | 2707647 |               |

### HPLC spectrum of **3b**

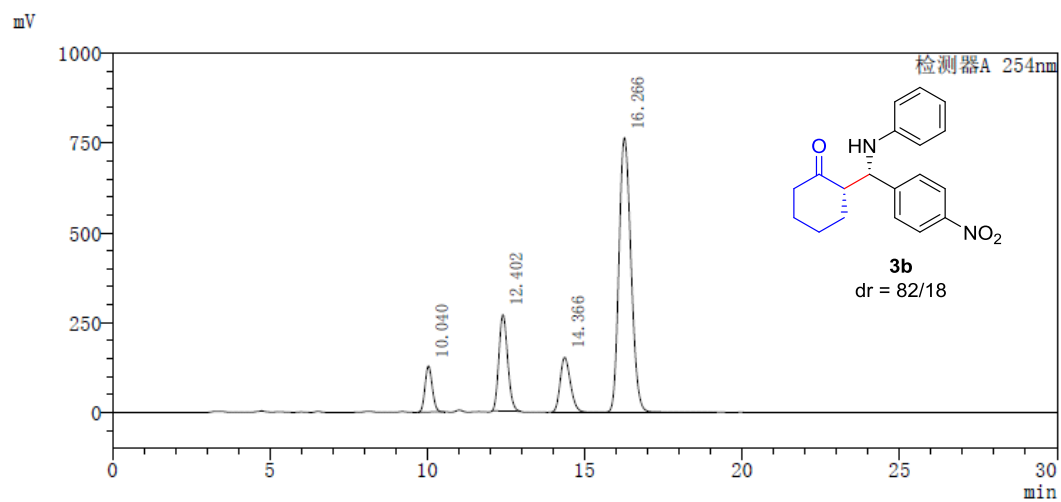

检测器A 254nm

| No. | Retention Time | Area     | Height  | Concentration |
|-----|----------------|----------|---------|---------------|
| 1   | 10.040         | 2056816  | 128437  | 6.619         |
| 2   | 12.402         | 5241282  | 268788  | 16.866        |
| 3   | 14.366         | 3455178  | 152264  | 11.119        |
| 4   | 16.266         | 20322177 | 763878  | 65.396        |
| 总计  |                | 31075454 | 1313366 |               |



### HPLC spectrum of *Rac-3c*

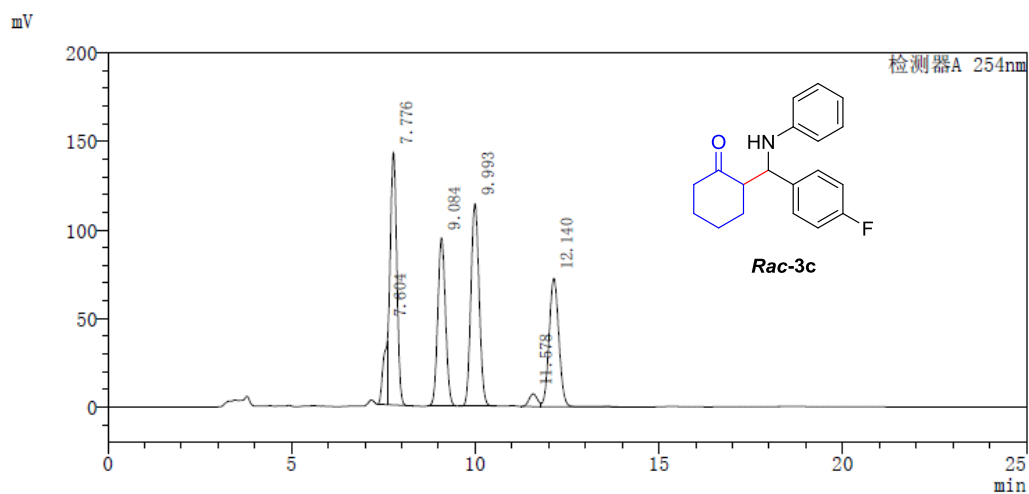

检测器A 254nm

| No. | Retention Time | Area    | Height | Concentration |
|-----|----------------|---------|--------|---------------|
| 1   | 7.604          | 280373  | 34190  | 4.179         |
| 2   | 7.776          | 1811267 | 142502 | 27.000        |
| 3   | 9.084          | 1383542 | 94831  | 20.624        |
| 4   | 9.993          | 1784639 | 114448 | 26.603        |
| 5   | 11.578         | 112226  | 7174   | 1.673         |
| 6   | 12.140         | 1336255 | 72366  | 19.919        |
| 总计  |                | 6708302 | 465511 |               |

### HPLC spectrum of **3c**

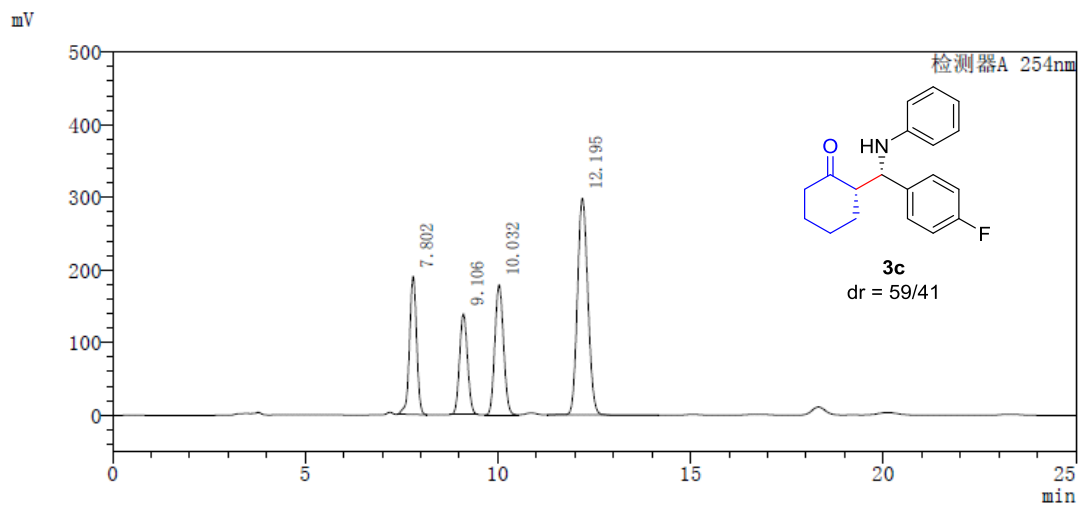

检测器A 254nm

| No. | Retention Time | Area     | Height | Concentration |
|-----|----------------|----------|--------|---------------|
| 1   | 7.802          | 2424324  | 189361 | 18.868        |
| 2   | 9.106          | 1995104  | 138497 | 15.528        |
| 3   | 10.032         | 2796311  | 178809 | 21.763        |
| 4   | 12.195         | 5632940  | 298008 | 43.841        |
| 总计  |                | 12848679 | 804675 |               |

### HPLC spectrum of *Rac-3d*

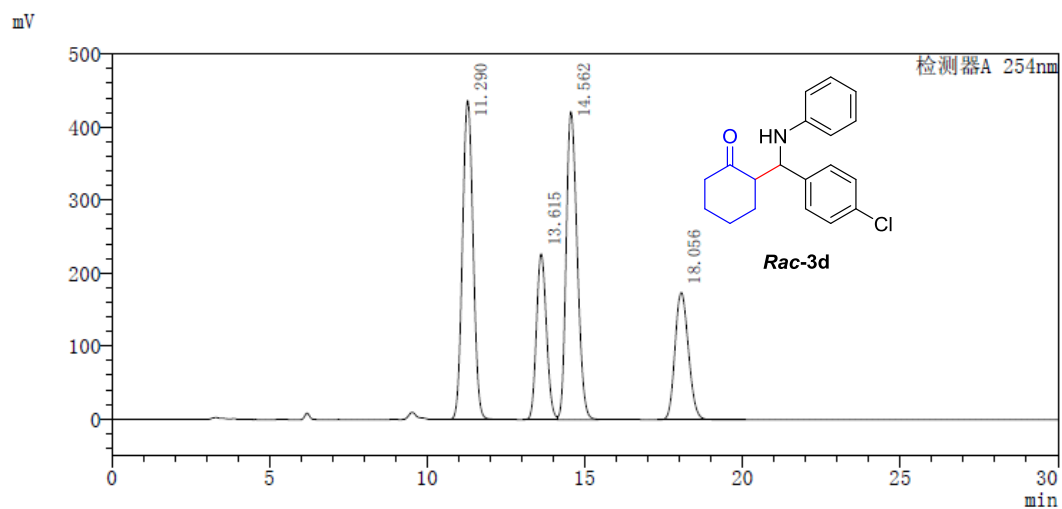

检测器A 254nm

| No. | Retention Time | Area     | Height  | Concentration |
|-----|----------------|----------|---------|---------------|
| 1   | 11.290         | 10219101 | 436522  | 33.419        |
| 2   | 13.615         | 5021262  | 226846  | 16.421        |
| 3   | 14.562         | 10247714 | 421225  | 33.513        |
| 4   | 18.056         | 5090554  | 174252  | 16.647        |
| 总计  |                | 30578630 | 1258844 |               |

### HPLC spectrum of **3d**

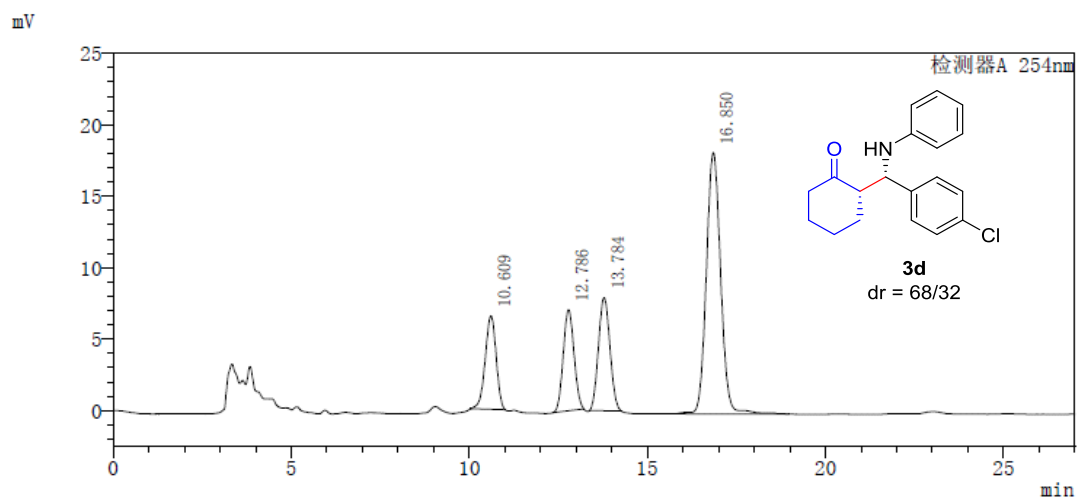

检测器A 254nm

| No. | Retention Time | Area   | Height | Concentration |
|-----|----------------|--------|--------|---------------|
| 1   | 10.609         | 139585 | 6544   | 14.247        |
| 2   | 12.786         | 149161 | 7061   | 15.224        |
| 3   | 13.784         | 177710 | 7917   | 18.138        |
| 4   | 16.850         | 513323 | 18278  | 52.392        |
| 总计  |                | 979779 | 39799  |               |

### HPLC spectrum of *Rac-3e*

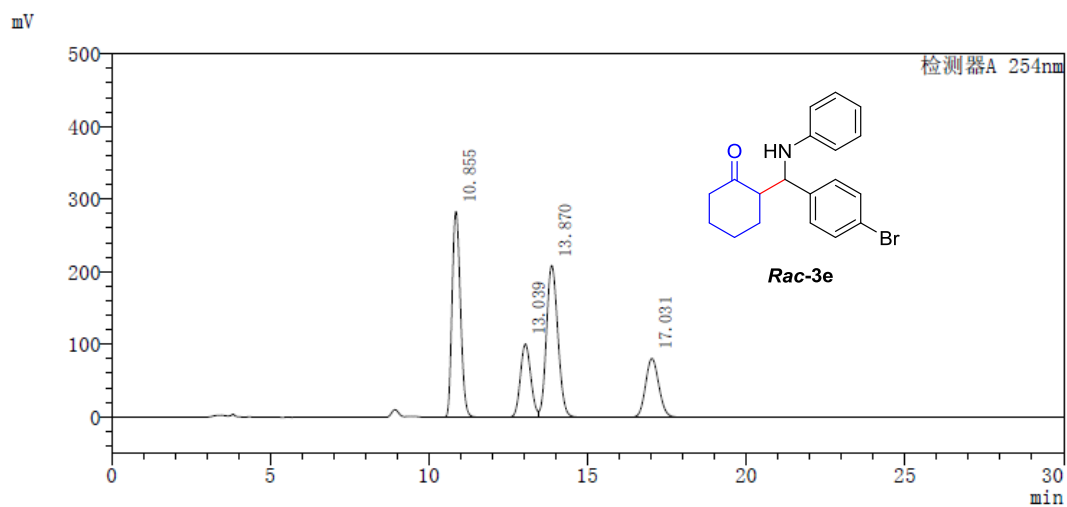

检测器A 254nm

| No. | Retention Time | Area     | Height | Concentration |
|-----|----------------|----------|--------|---------------|
| 1   | 10.855         | 5174394  | 283360 | 34.348        |
| 2   | 13.039         | 2311429  | 100682 | 15.344        |
| 3   | 13.870         | 5237335  | 208840 | 34.766        |
| 4   | 17.031         | 2341312  | 80859  | 15.542        |
| 总计  |                | 15064470 | 673742 |               |

### HPLC spectrum of *3e*

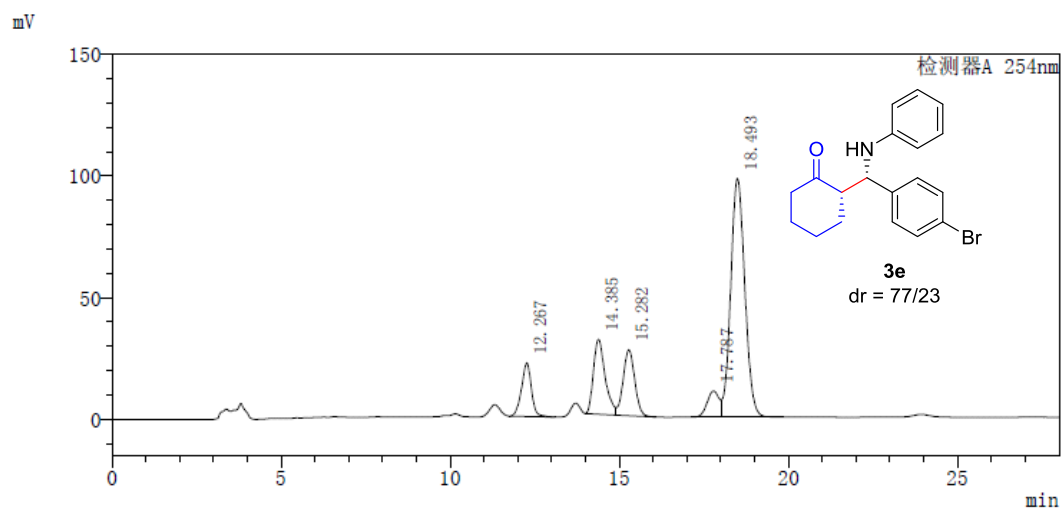

检测器A 254nm

| No. | Retention Time | Area    | Height | Concentration |
|-----|----------------|---------|--------|---------------|
| 1   | 12.267         | 448103  | 22000  | 9.044         |
| 2   | 14.385         | 745161  | 30789  | 15.039        |
| 3   | 15.282         | 644081  | 27057  | 12.999        |
| 4   | 17.787         | 261235  | 10714  | 5.272         |
| 5   | 18.493         | 2856139 | 97955  | 57.645        |
| 总计  |                | 4954720 | 188515 |               |

### HPLC spectrum of *Rac-3f*

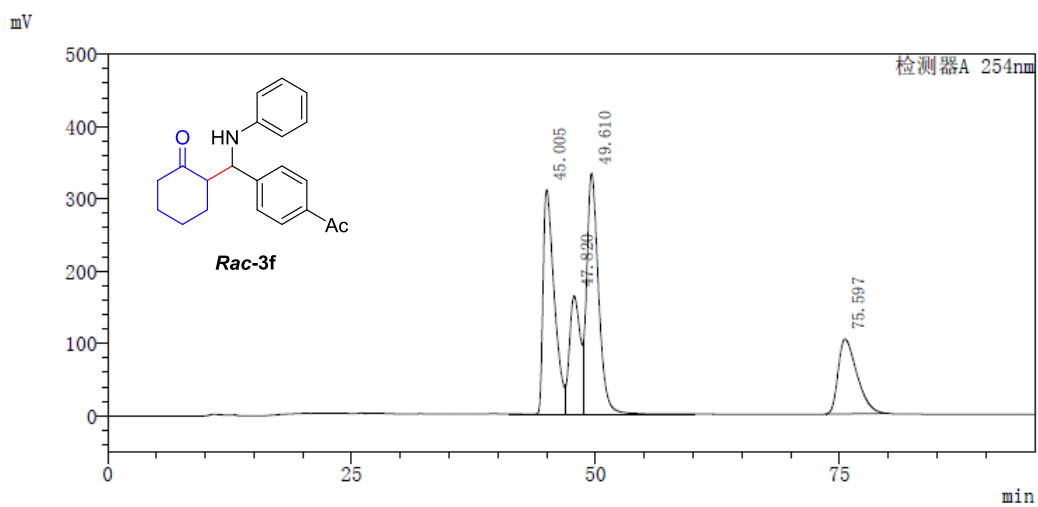

检测器A 254nm

| No. | Retention Time | Area     | Height | Concentration |
|-----|----------------|----------|--------|---------------|
| 1   | 45.005         | 24943724 | 310632 | 31.419        |
| 2   | 47.820         | 12593381 | 163332 | 15.862        |
| 3   | 49.610         | 27976848 | 332930 | 35.239        |
| 4   | 75.597         | 13877059 | 103380 | 17.479        |
| 总计  |                | 79391012 | 910274 |               |

### HPLC spectrum of *3f*

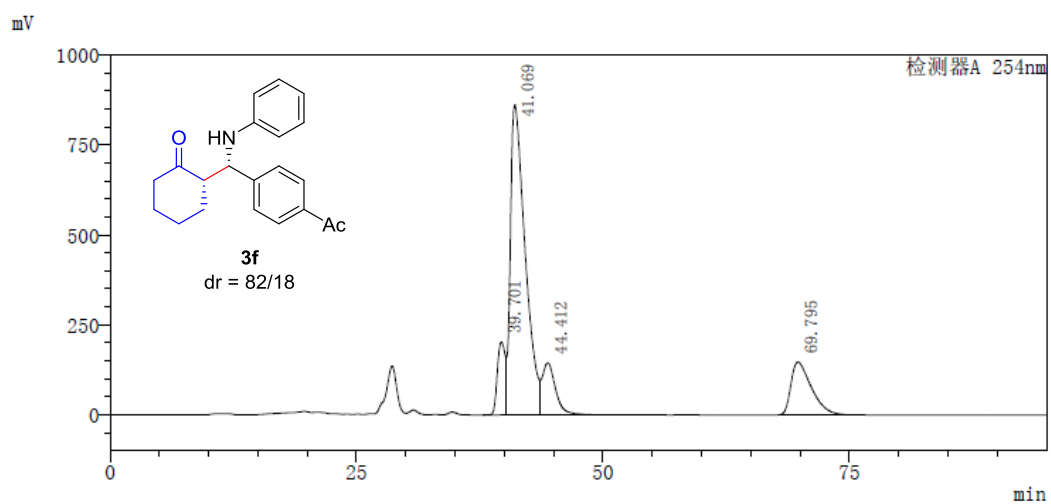

检测器A 254nm

| No. | Retention Time | Area      | Height  | Concentration |
|-----|----------------|-----------|---------|---------------|
| 1   | 39.701         | 11283540  | 203211  | 8.278         |
| 2   | 41.069         | 90262111  | 862853  | 66.218        |
| 3   | 44.412         | 13843645  | 145509  | 10.156        |
| 4   | 69.795         | 20920632  | 146263  | 15.348        |
| 总计  |                | 136309928 | 1357835 |               |

### HPLC spectrum of *Rac-3g*

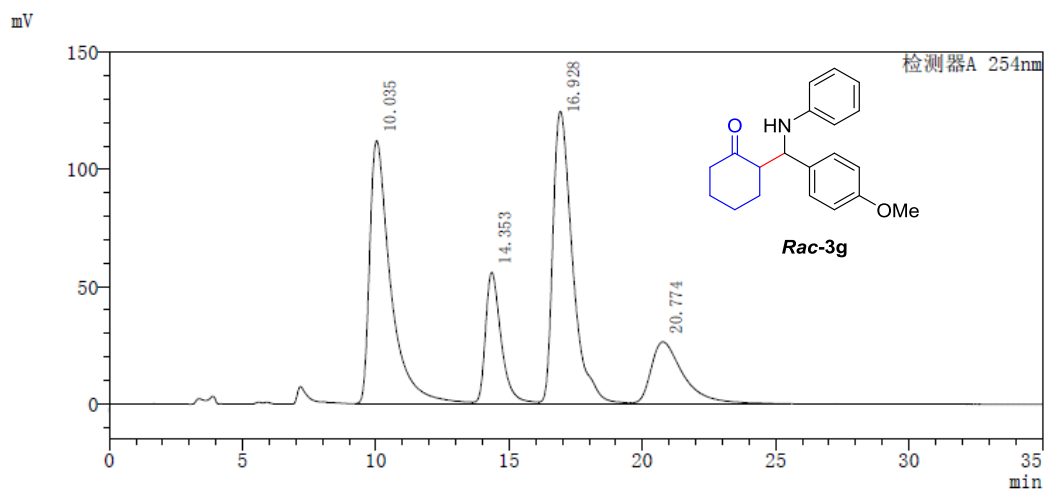

检测器A 254nm

| No. | Retention Time | Area     | Height | Concentration |
|-----|----------------|----------|--------|---------------|
| 1   | 10.035         | 6156271  | 112267 | 36.147        |
| 2   | 14.353         | 2286088  | 56027  | 13.423        |
| 3   | 16.928         | 6374914  | 124744 | 37.431        |
| 4   | 20.774         | 2213762  | 26358  | 12.998        |
| 总计  |                | 17031035 | 319396 |               |

### HPLC spectrum of **3g**

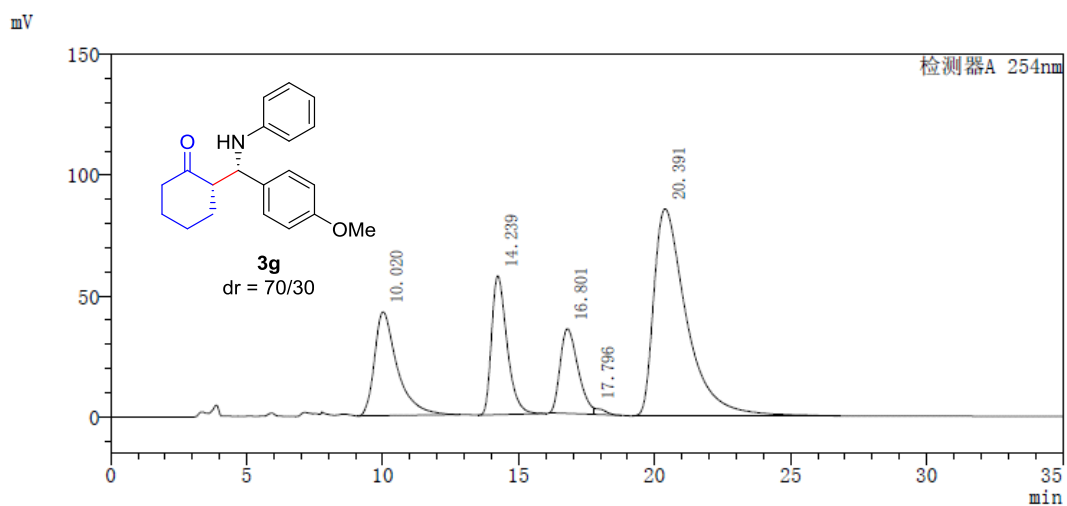

检测器A 254nm

| No. | Retention Time | Area     | Height | Concentration |
|-----|----------------|----------|--------|---------------|
| 1   | 10.020         | 2504211  | 42921  | 18.354        |
| 2   | 14.239         | 2282660  | 57398  | 16.730        |
| 3   | 16.801         | 1611812  | 35055  | 11.813        |
| 4   | 17.796         | 67690    | 2535   | 0.496         |
| 5   | 20.391         | 7177755  | 85651  | 52.607        |
| 总计  |                | 13644129 | 223560 |               |

### HPLC spectrum of *Rac-3h*

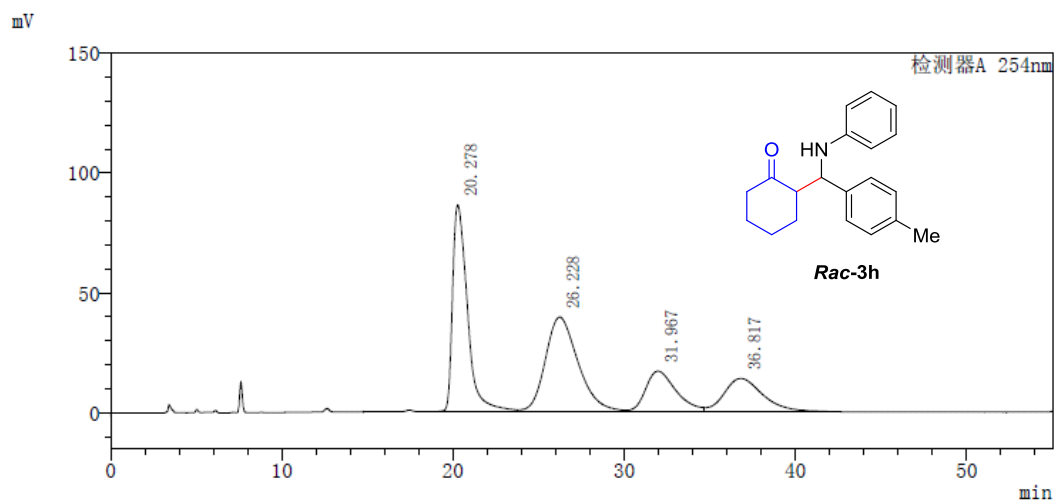

检测器A 254nm

| No. | Retention Time | Area     | Height | Concentration |
|-----|----------------|----------|--------|---------------|
| 1   | 20.278         | 5203384  | 86160  | 35.523        |
| 2   | 26.228         | 5223969  | 39351  | 35.664        |
| 3   | 31.967         | 2072592  | 16818  | 14.150        |
| 4   | 36.817         | 2147841  | 13794  | 14.663        |
| 总计  |                | 14647785 | 156123 |               |

### HPLC spectrum of *3h*

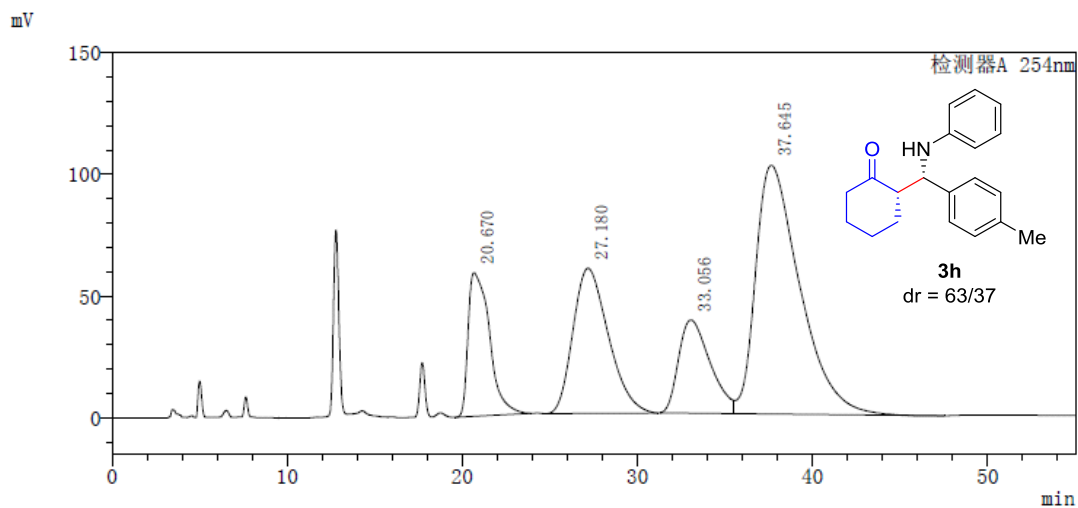

检测器A 254nm

| No. | Retention Time | Area     | Height | Concentration |
|-----|----------------|----------|--------|---------------|
| 1   | 20.670         | 5010358  | 59029  | 13.844        |
| 2   | 27.180         | 8389637  | 59648  | 23.181        |
| 3   | 33.056         | 4792032  | 38279  | 13.241        |
| 4   | 37.645         | 17999987 | 102168 | 49.735        |
| 总计  |                | 36192014 | 259124 |               |

### HPLC spectrum of *Rac-3i*

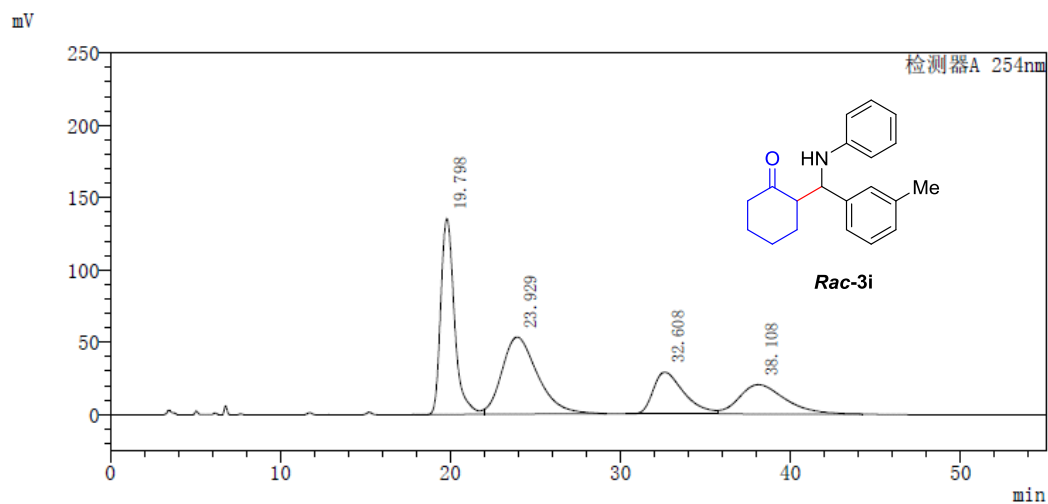

检测器A 254nm

| No. | Retention Time | Area     | Height | Concentration |
|-----|----------------|----------|--------|---------------|
| 1   | 19.798         | 7619599  | 135272 | 33.378        |
| 2   | 23.929         | 7719446  | 53200  | 33.816        |
| 3   | 32.608         | 3659992  | 28943  | 16.033        |
| 4   | 38.108         | 3828955  | 20332  | 16.773        |
| 总计  |                | 22827993 | 237747 |               |

### HPLC spectrum of **3i**

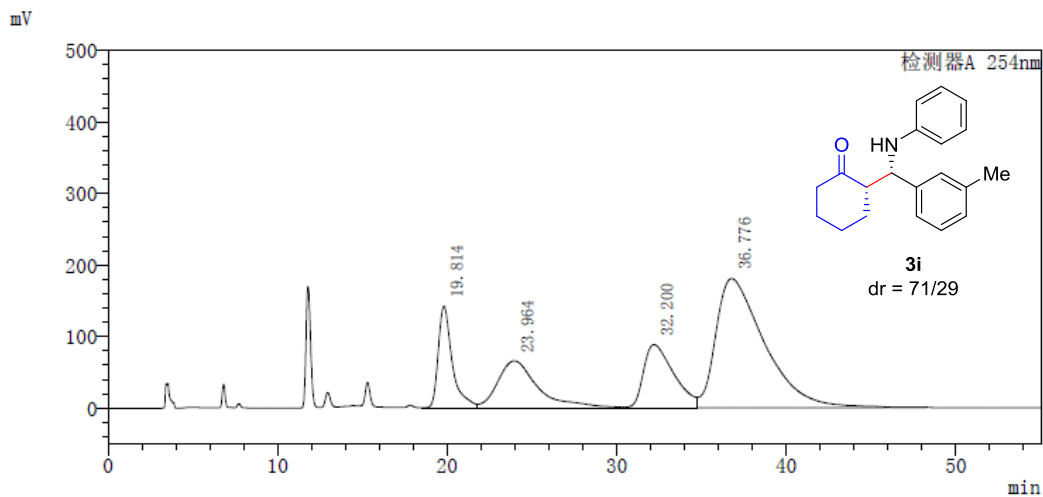

检测器A 254nm

| No. | Retention Time | Area     | Height | Concentration |
|-----|----------------|----------|--------|---------------|
| 1   | 19.814         | 8164927  | 141931 | 12.399        |
| 2   | 23.964         | 10776949 | 65402  | 16.366        |
| 3   | 32.200         | 10870028 | 88142  | 16.507        |
| 4   | 36.776         | 36039267 | 180395 | 54.728        |
| 总计  |                | 65851170 | 475869 |               |

### HPLC spectrum of *Rac-3j*

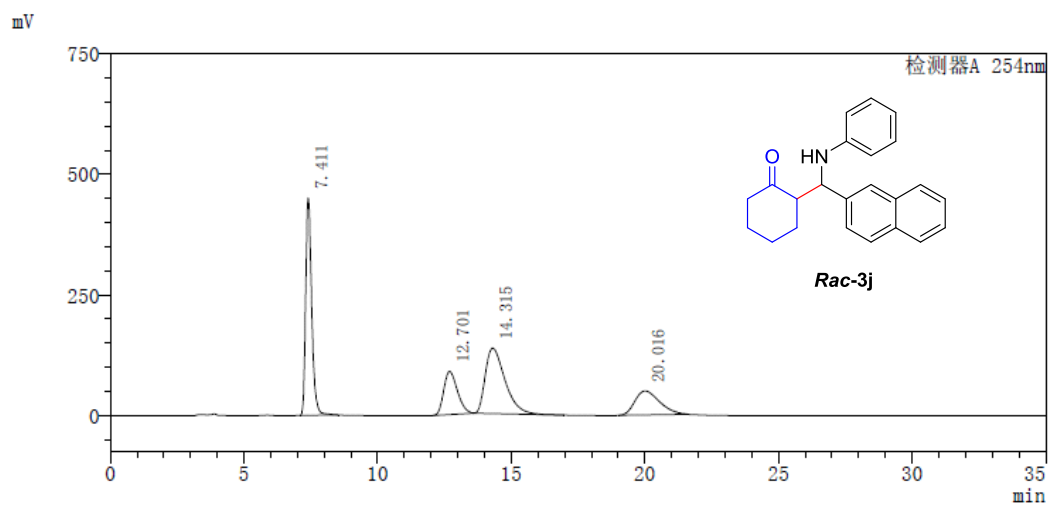

检测器A 254nm

| No. | Retention Time | Area     | Height | Concentration |
|-----|----------------|----------|--------|---------------|
| 1   | 7.411          | 7041227  | 451410 | 34.538        |
| 2   | 12.701         | 3174983  | 89458  | 15.574        |
| 3   | 14.315         | 6962883  | 135562 | 34.154        |
| 4   | 20.016         | 3207544  | 49717  | 15.734        |
| 总计  |                | 20386636 | 726147 |               |

### HPLC spectrum of **3j**

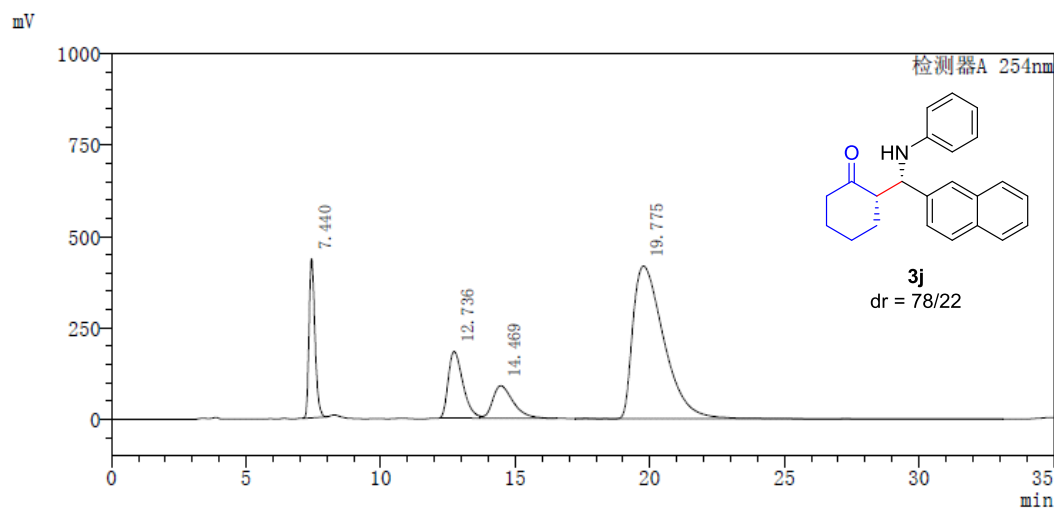

检测器A 254nm

| No. | Retention Time | Area     | Height  | Concentration |
|-----|----------------|----------|---------|---------------|
| 1   | 7.440          | 6673589  | 435276  | 12.860        |
| 2   | 12.736         | 6873230  | 182312  | 13.244        |
| 3   | 14.469         | 4709979  | 88754   | 9.076         |
| 4   | 19.775         | 33639277 | 417749  | 64.820        |
| 总计  |                | 51896075 | 1124091 |               |



### HPLC spectrum of *Rac-3k*

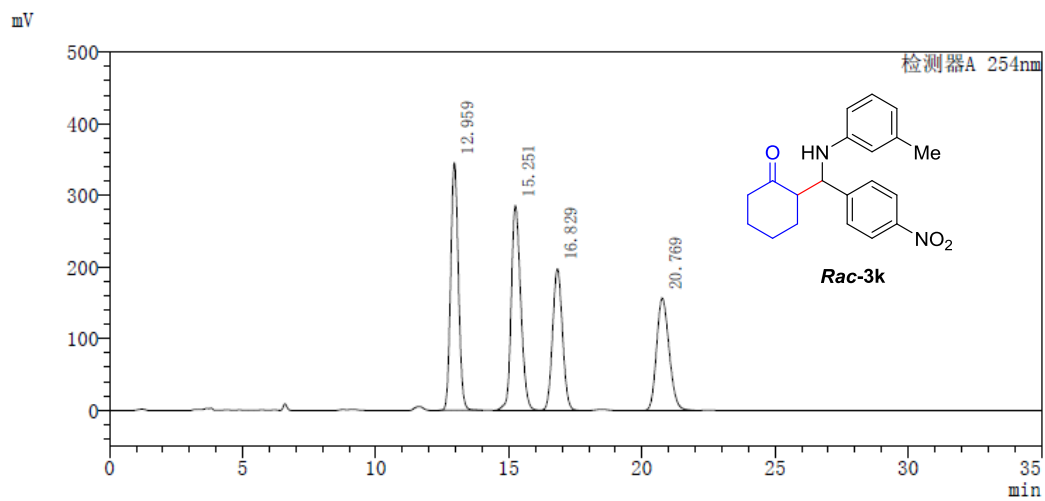

检测器A 254nm

| No. | Retention Time | Area     | Height | Concentration |
|-----|----------------|----------|--------|---------------|
| 1   | 12.959         | 6950659  | 345330 | 28.600        |
| 2   | 15.251         | 7104414  | 285743 | 29.233        |
| 3   | 16.829         | 5108399  | 197532 | 21.020        |
| 4   | 20.769         | 5139547  | 156686 | 21.148        |
| 总计  |                | 24303020 | 985291 |               |

### HPLC spectrum of **3k**

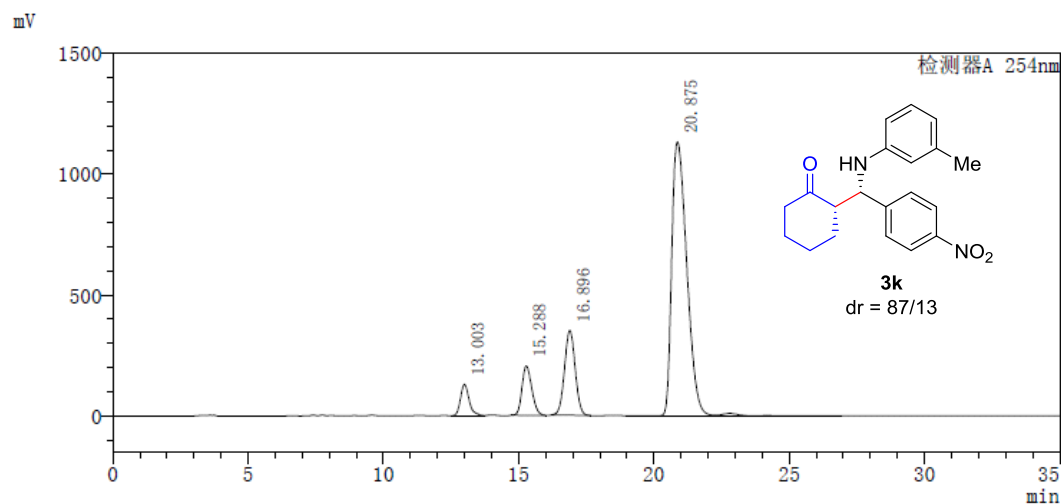

检测器A 254nm

| No. | Retention Time | Area     | Height  | Concentration |
|-----|----------------|----------|---------|---------------|
| 1   | 13.003         | 2863369  | 128951  | 4.651         |
| 2   | 15.288         | 5133690  | 203728  | 8.339         |
| 3   | 16.896         | 9600775  | 350388  | 15.595        |
| 4   | 20.875         | 43965660 | 1133141 | 71.415        |
| 总计  |                | 61563495 | 1816209 |               |

HPLC spectrum of **Rac-3I**

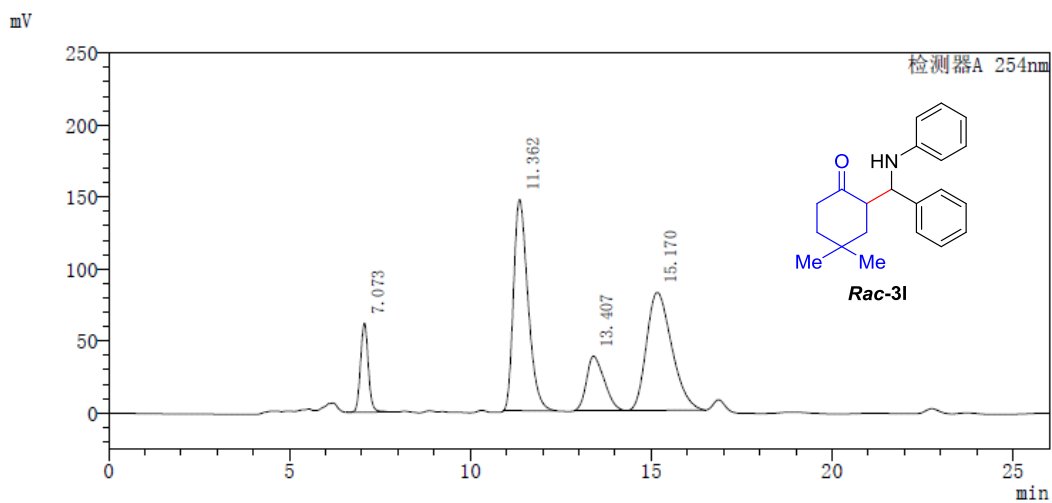

检测器A 254nm

| No. | Retention Time | Area     | Height | Concentration |
|-----|----------------|----------|--------|---------------|
| 1   | 7.073          | 930394   | 61685  | 9.062         |
| 2   | 11.362         | 4075009  | 146518 | 39.689        |
| 3   | 13.407         | 1282763  | 37804  | 12.494        |
| 4   | 15.170         | 3979225  | 81840  | 38.756        |
| 总计  |                | 10267391 | 327846 |               |

HPLC spectrum of **3I**

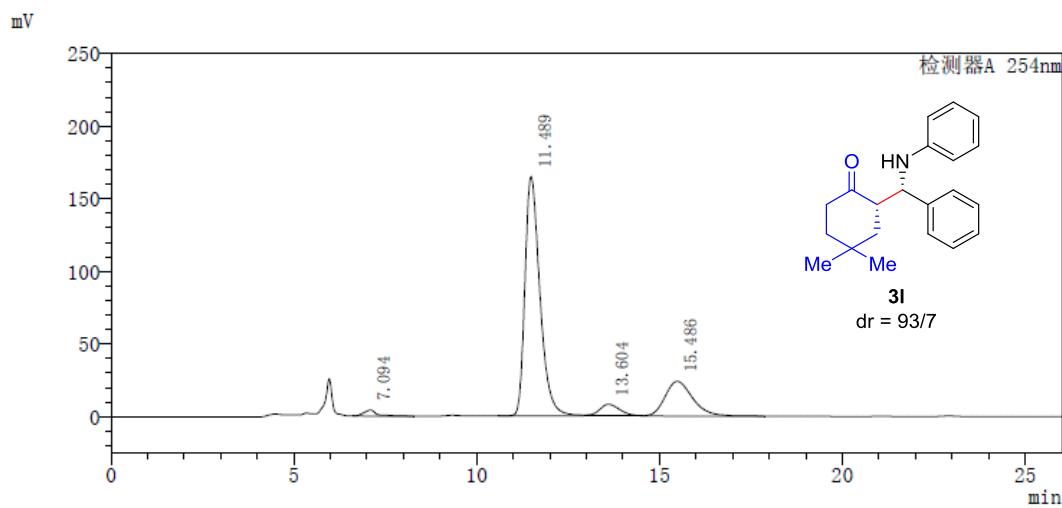

检测器A 254nm

| No. | Retention Time | Area    | Height | Concentration |
|-----|----------------|---------|--------|---------------|
| 1   | 7.094          | 107527  | 4310   | 1.688         |
| 2   | 11.489         | 4688244 | 164680 | 73.578        |
| 3   | 13.604         | 314134  | 8025   | 4.930         |
| 4   | 15.486         | 1261912 | 23912  | 19.805        |
| 总计  |                | 6371818 | 200927 |               |

### HPLC spectrum of *Rac-5a*

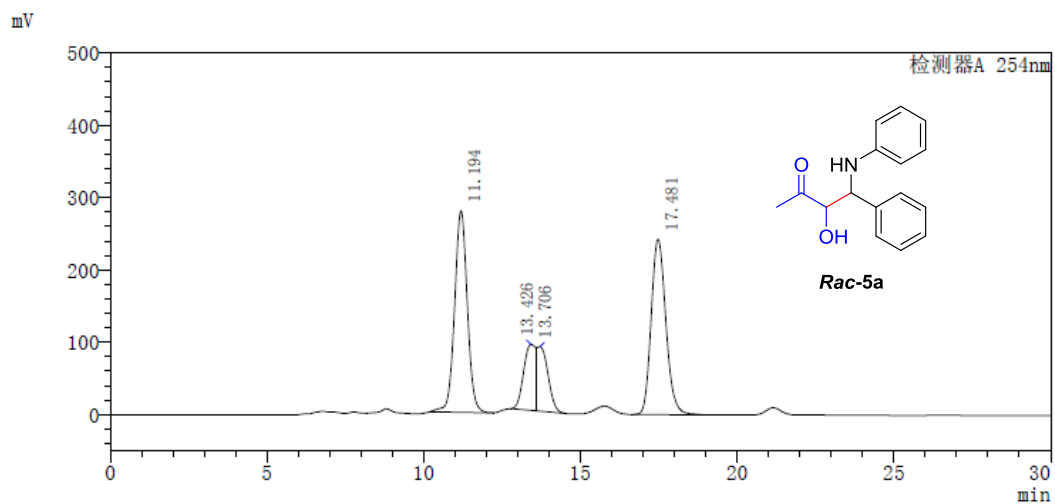

检测器A 254nm

| No. | Retention Time | Area     | Height | Concentration |
|-----|----------------|----------|--------|---------------|
| 1   | 11.194         | 7862006  | 278694 | 38.609        |
| 2   | 13.426         | 2306976  | 91127  | 11.329        |
| 3   | 13.706         | 2297040  | 88878  | 11.280        |
| 4   | 17.481         | 7897257  | 242491 | 38.782        |
| 总计  |                | 20363280 | 701189 |               |

### HPLC spectrum of *5a*

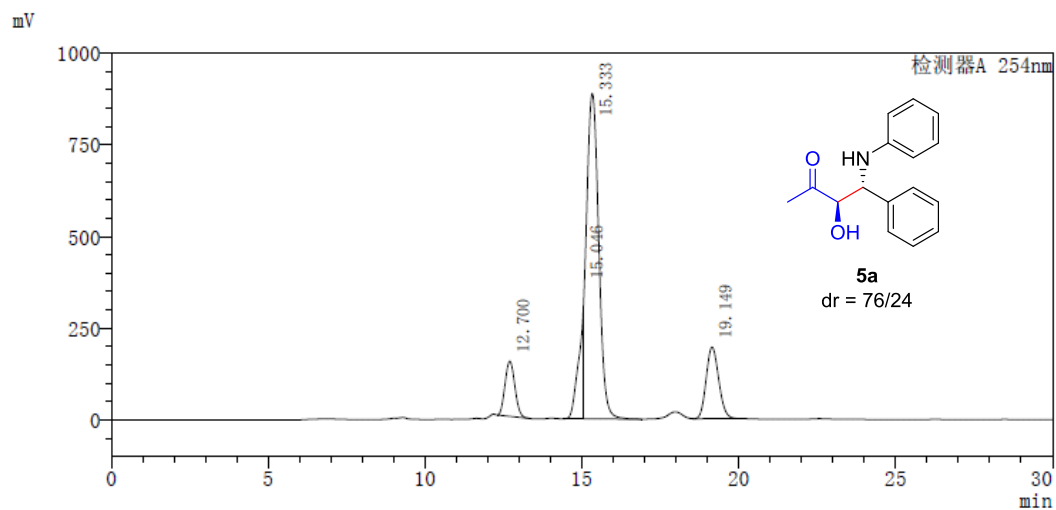

检测器A 254nm

| No. | Retention Time | Area     | Height  | Concentration |
|-----|----------------|----------|---------|---------------|
| 1   | 12.700         | 3286250  | 150384  | 9.168         |
| 2   | 15.046         | 3321781  | 292288  | 9.267         |
| 3   | 15.333         | 23804952 | 887767  | 66.410        |
| 4   | 19.149         | 5432206  | 194962  | 15.155        |
| 总计  |                | 35845189 | 1525401 |               |

### HPLC spectrum of *Rac-5b*

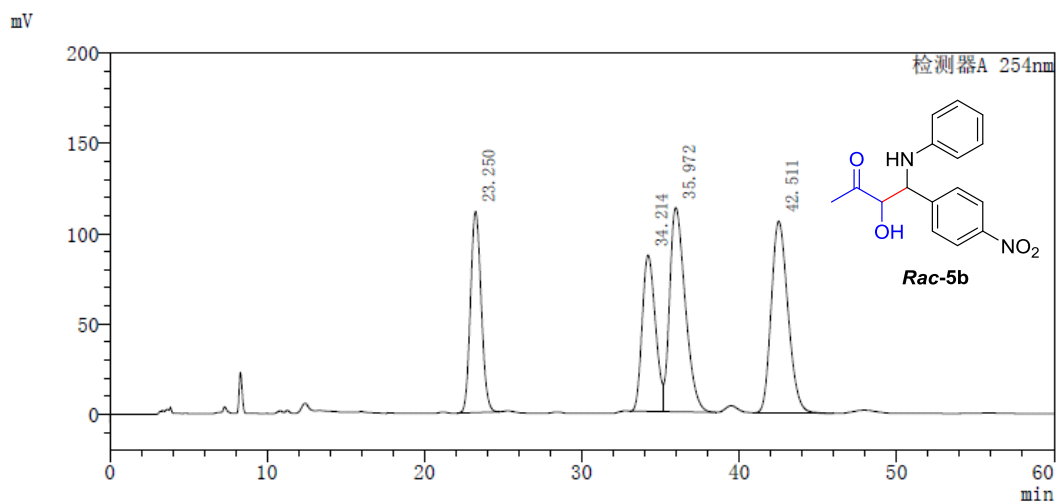

检测器A 254nm

| No. | Retention Time | Area     | Height | Concentration |
|-----|----------------|----------|--------|---------------|
| 1   | 23.250         | 5267929  | 111467 | 20.264        |
| 2   | 34.214         | 5084154  | 86327  | 19.558        |
| 3   | 35.972         | 7798818  | 113178 | 30.000        |
| 4   | 42.511         | 7845021  | 106238 | 30.178        |
| 总计  |                | 25995922 | 417410 |               |

### HPLC spectrum of *5b*

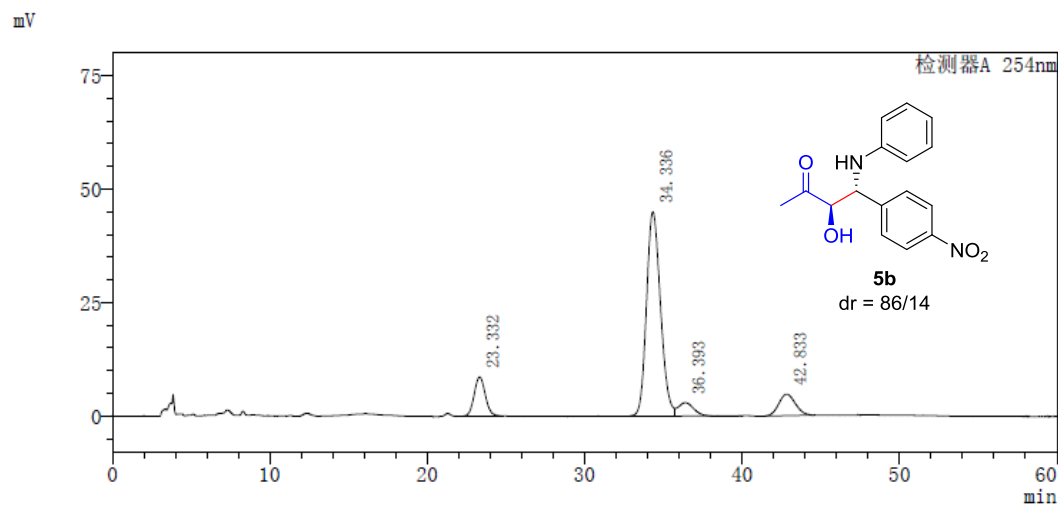

检测器A 254nm

| No. | Retention Time | Area    | Height | Concentration |
|-----|----------------|---------|--------|---------------|
| 1   | 23.332         | 417157  | 8578   | 11.180        |
| 2   | 34.336         | 2775526 | 44951  | 74.388        |
| 3   | 36.393         | 187890  | 2930   | 5.036         |
| 4   | 42.833         | 350559  | 4756   | 9.396         |
| 总计  |                | 3731133 | 61216  |               |

### HPLC spectrum of *Rac-5c*

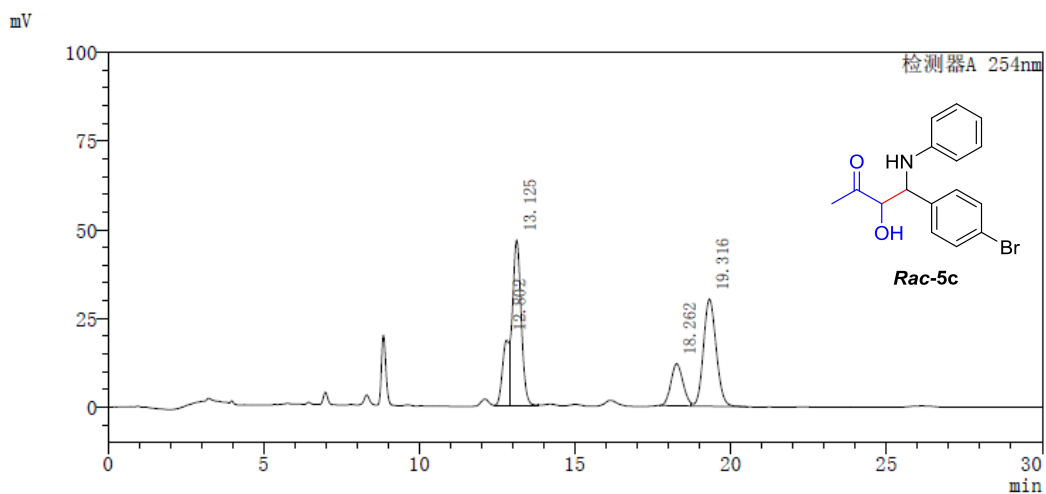

检测器A 254nm

| No. | Retention Time | Area    | Height | Concentration |
|-----|----------------|---------|--------|---------------|
| 1   | 12.802         | 280186  | 18428  | 11.843        |
| 2   | 13.125         | 908395  | 46635  | 38.397        |
| 3   | 18.262         | 316875  | 11799  | 13.394        |
| 4   | 19.316         | 860332  | 30155  | 36.366        |
| 总计  |                | 2365789 | 107016 |               |

### HPLC spectrum of *5c*

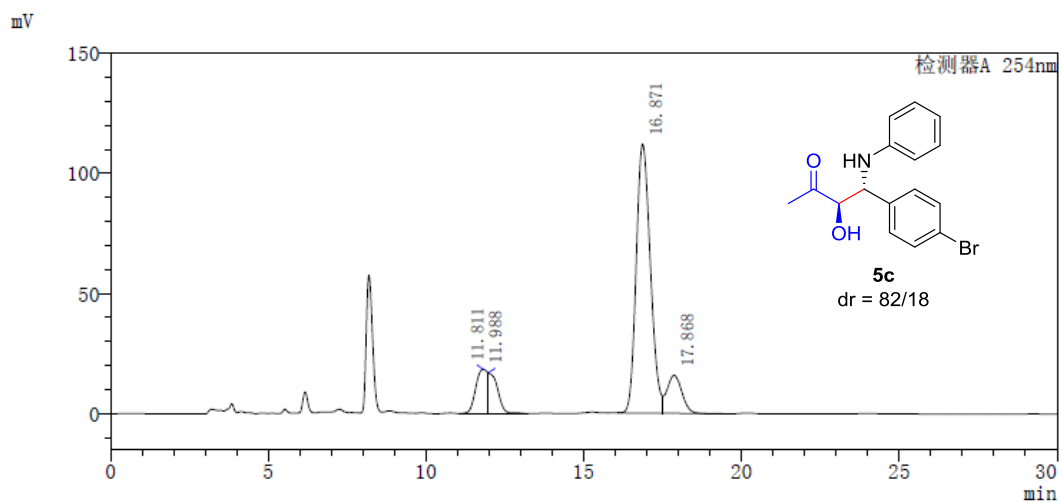

检测器A 254nm

| No. | Retention Time | Area    | Height | Concentration |
|-----|----------------|---------|--------|---------------|
| 1   | 11.811         | 467075  | 18360  | 9.676         |
| 2   | 11.988         | 336468  | 16808  | 6.971         |
| 3   | 16.871         | 3509661 | 111902 | 72.709        |
| 4   | 17.868         | 513784  | 15877  | 10.644        |
| 总计  |                | 4826988 | 162946 |               |

### HPLC spectrum of *Rac-5d*

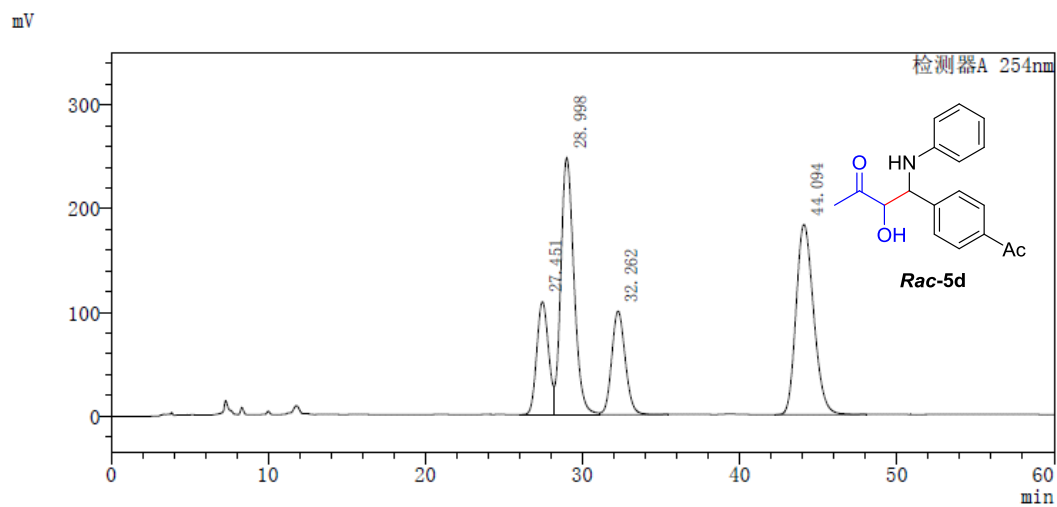

检测器A 254nm

| No. | Retention Time | Area     | Height | Concentration |
|-----|----------------|----------|--------|---------------|
| 1   | 27.451         | 5700298  | 108932 | 14.110        |
| 2   | 28.998         | 14428942 | 247659 | 35.715        |
| 3   | 32.262         | 5991123  | 99733  | 14.830        |
| 4   | 44.094         | 14279308 | 183364 | 35.345        |
| 总计  |                | 40399671 | 639688 |               |

### HPLC spectrum of *5d*

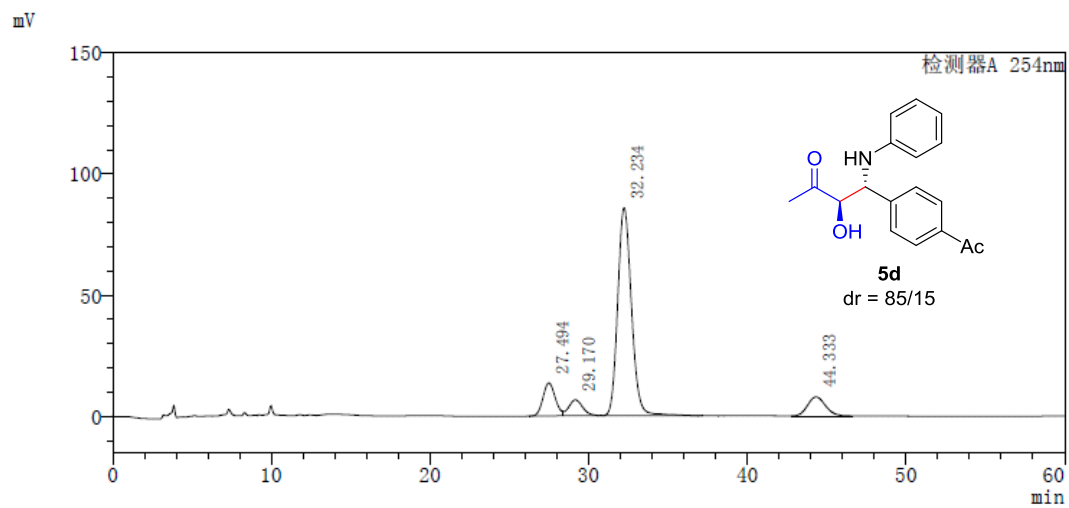

检测器A 254nm

| No. | Retention Time | Area    | Height | Concentration |
|-----|----------------|---------|--------|---------------|
| 1   | 27.494         | 724939  | 13640  | 10.468        |
| 2   | 29.170         | 400903  | 6532   | 5.789         |
| 3   | 32.234         | 5182683 | 85781  | 74.837        |
| 4   | 44.333         | 616806  | 7865   | 8.907         |
| 总计  |                | 6925331 | 113818 |               |

### HPLC spectrum of *Rac-5e*

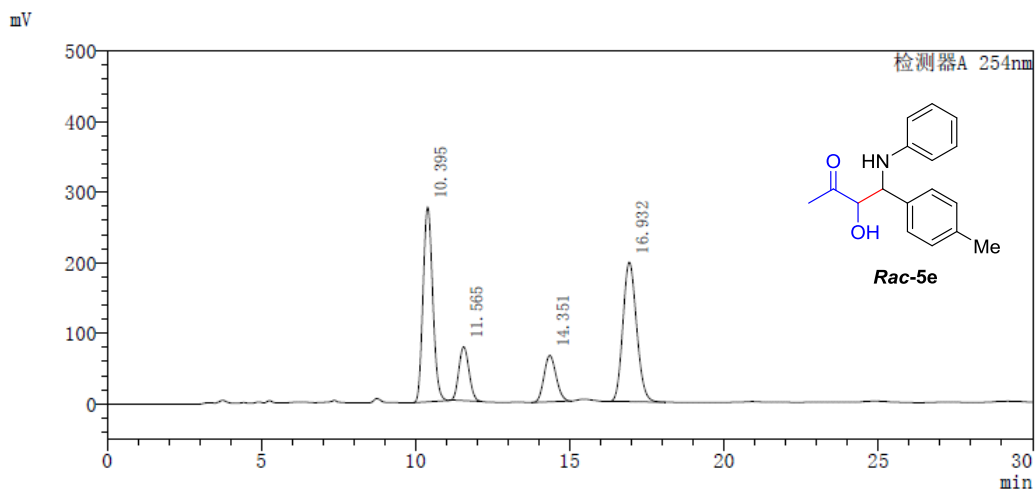

检测器A 254nm

| No. | Retention Time | Area     | Height | Concentration |
|-----|----------------|----------|--------|---------------|
| 1   | 10.395         | 6024852  | 275607 | 38.392        |
| 2   | 11.565         | 1752950  | 76376  | 11.170        |
| 3   | 14.351         | 1807648  | 65745  | 11.519        |
| 4   | 16.932         | 6107622  | 197380 | 38.919        |
| 总计  |                | 15693072 | 615108 |               |

### HPLC spectrum of *5e*

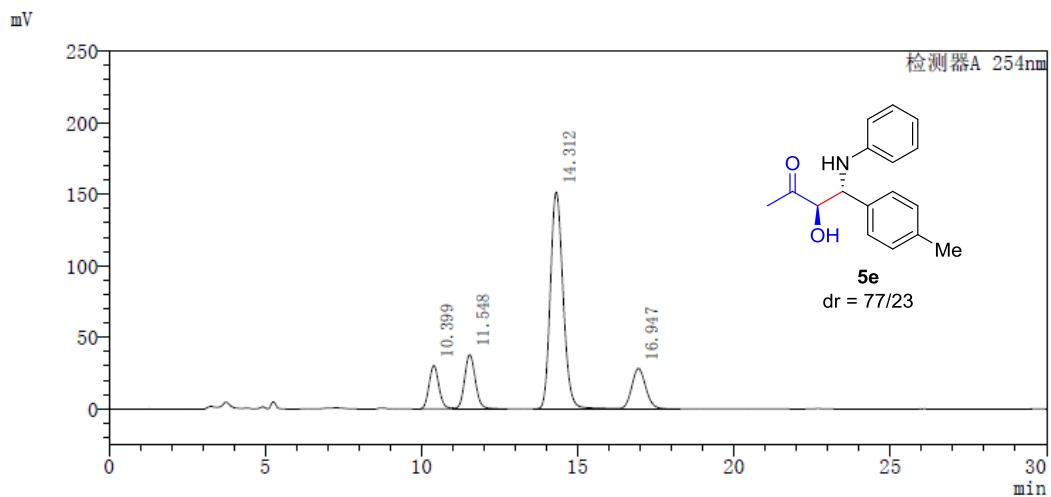

检测器A 254nm

| No. | Retention Time | Area    | Height | Concentration |
|-----|----------------|---------|--------|---------------|
| 1   | 10.399         | 668201  | 30209  | 9.907         |
| 2   | 11.548         | 904780  | 37853  | 13.415        |
| 3   | 14.312         | 4292621 | 151437 | 63.647        |
| 4   | 16.947         | 878811  | 28214  | 13.030        |
| 总计  |                | 6744412 | 247713 |               |

HPLC spectrum of **Rac-5f**

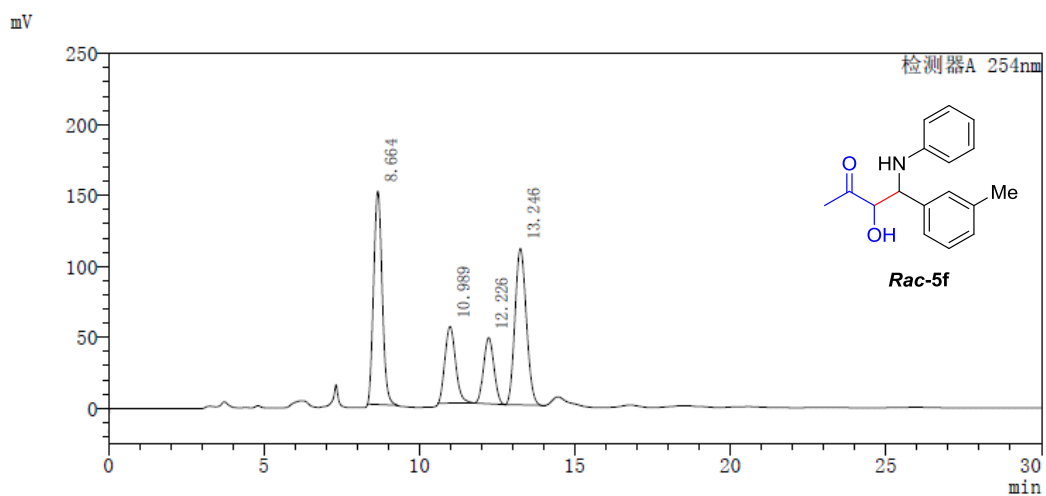

检测器A 254nm

| No. | Retention Time | Area    | Height | Concentration |
|-----|----------------|---------|--------|---------------|
| 1   | 8.664          | 2883667 | 150303 | 35.815        |
| 2   | 10.989         | 1293166 | 54041  | 16.061        |
| 3   | 12.226         | 1067432 | 46558  | 13.257        |
| 4   | 13.246         | 2807398 | 110116 | 34.867        |
| 总计  |                | 8051663 | 361017 |               |

HPLC spectrum of **5f**

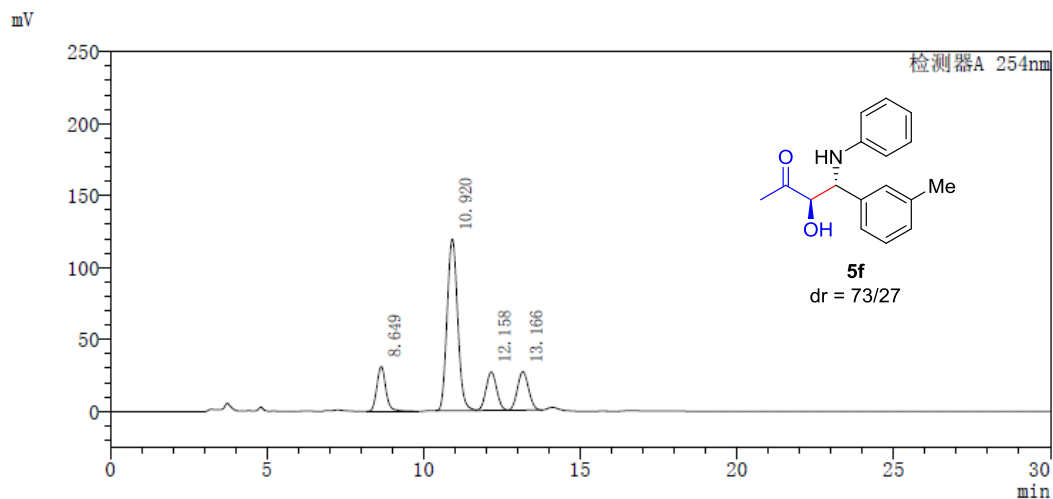

检测器A 254nm

| No. | Retention Time | Area    | Height | Concentration |
|-----|----------------|---------|--------|---------------|
| 1   | 8.649          | 619022  | 31186  | 13.139        |
| 2   | 10.920         | 2807193 | 119273 | 59.584        |
| 3   | 12.158         | 619659  | 26658  | 13.153        |
| 4   | 13.166         | 665414  | 26790  | 14.124        |
| 总计  |                | 4711288 | 203906 |               |



### HPLC spectrum of *Rac-5g*

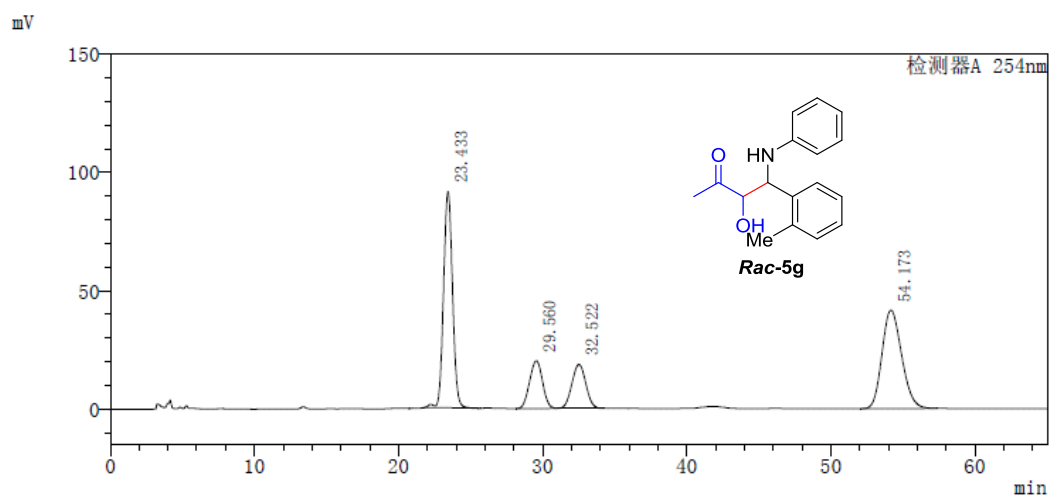

检测器A 254nm

| No. | Retention Time | Area     | Height | Concentration |
|-----|----------------|----------|--------|---------------|
| 1   | 23.433         | 3954003  | 91210  | 38.018        |
| 2   | 29.560         | 1260561  | 20162  | 12.120        |
| 3   | 32.522         | 1251063  | 18579  | 12.029        |
| 4   | 54.173         | 3934666  | 41593  | 37.832        |
| 总计  |                | 10400293 | 171544 |               |

### HPLC spectrum of **5g**

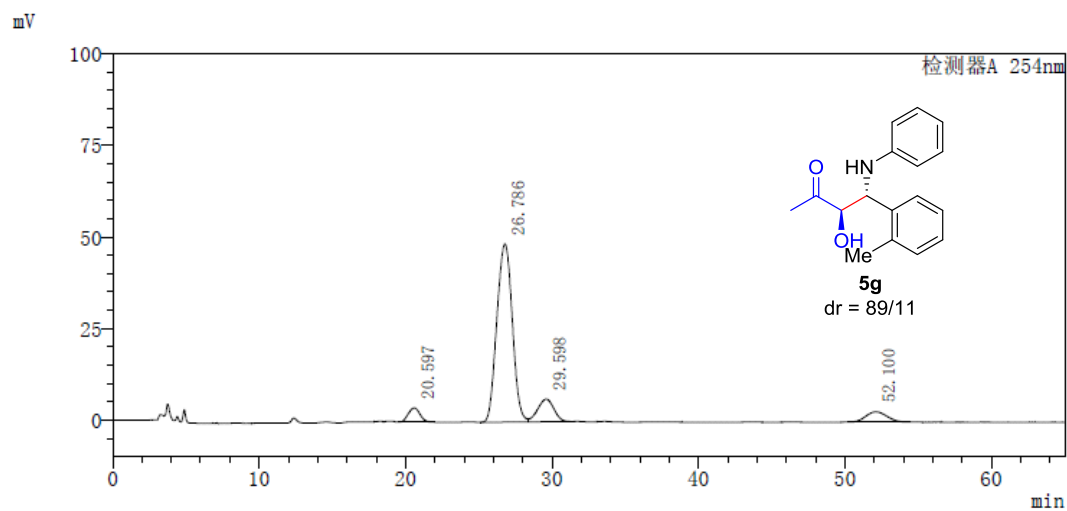

检测器A 254nm

| No. | Retention Time | Area    | Height | Concentration |
|-----|----------------|---------|--------|---------------|
| 1   | 20.597         | 218361  | 3913   | 4.792         |
| 2   | 26.786         | 3577902 | 48665  | 78.519        |
| 3   | 29.598         | 474389  | 6178   | 10.411        |
| 4   | 52.100         | 286083  | 2838   | 6.278         |
| 总计  |                | 4556735 | 61594  |               |

### HPLC spectrum of *Rac-5h*

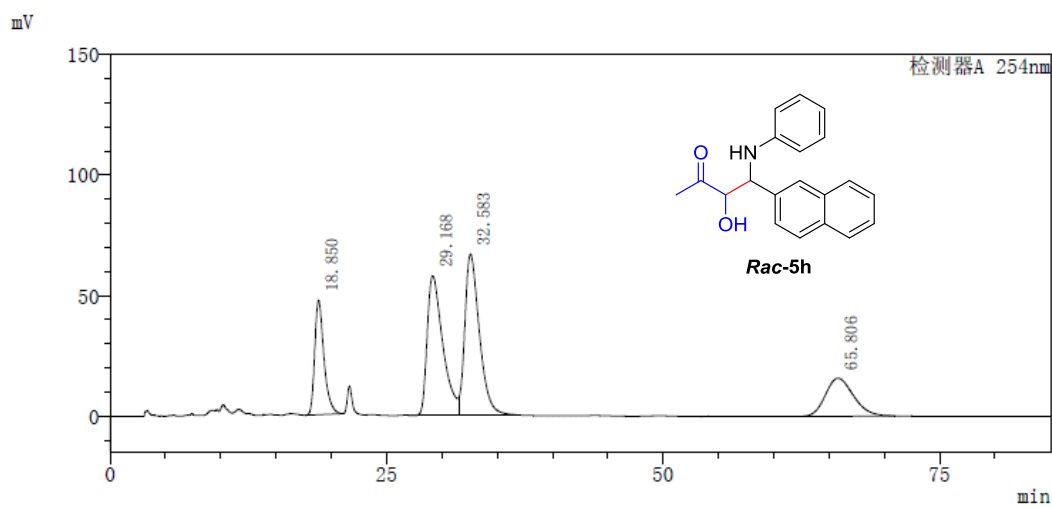

检测器A 254nm

| No. | Retention Time | Area     | Height | Concentration |
|-----|----------------|----------|--------|---------------|
| 1   | 18.850         | 2763008  | 47487  | 15.946        |
| 2   | 29.168         | 5662053  | 57853  | 32.676        |
| 3   | 32.583         | 6119214  | 66760  | 35.314        |
| 4   | 65.806         | 2783492  | 15755  | 16.064        |
| 总计  |                | 17327767 | 187855 |               |

### HPLC spectrum of *5h*

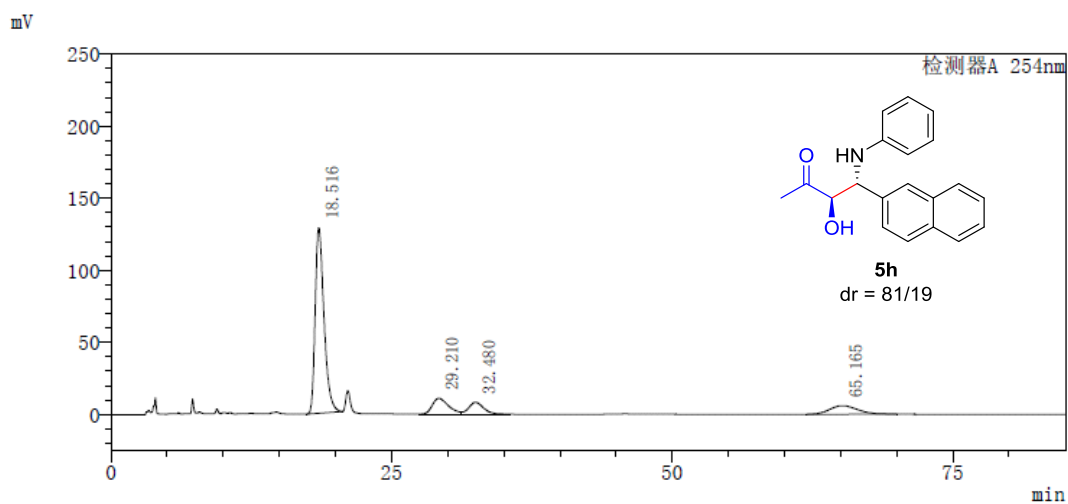

检测器A 254nm

| No. | Retention Time | Area    | Height | Concentration |
|-----|----------------|---------|--------|---------------|
| 1   | 18.516         | 7026587 | 128585 | 70.899        |
| 2   | 29.210         | 1098278 | 10980  | 11.082        |
| 3   | 32.480         | 759106  | 8248   | 7.659         |
| 4   | 65.165         | 1026764 | 5942   | 10.360        |
| 总计  |                | 9910736 | 153755 |               |

### HPLC spectrum of *Rac-5i*

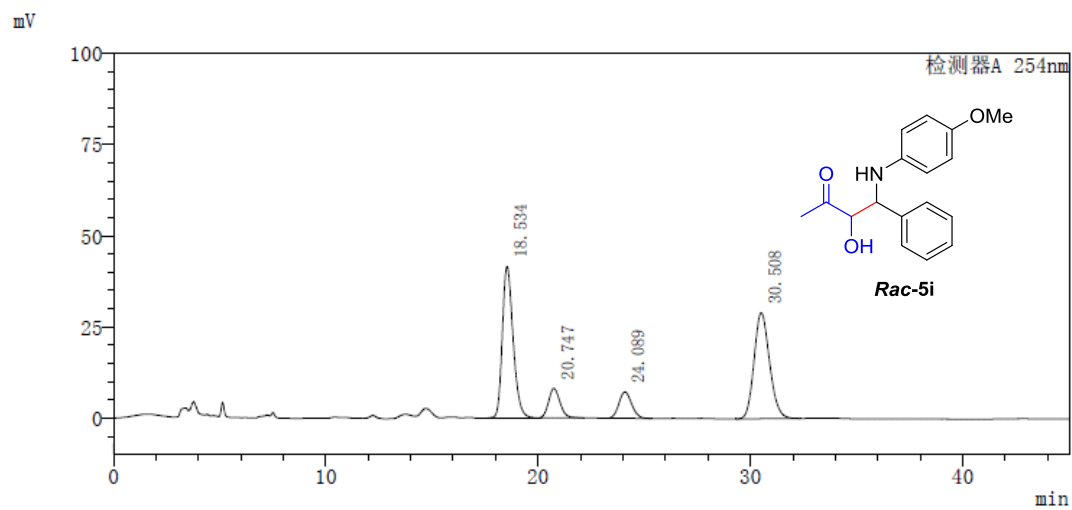

检测器A 254nm

| No. | Retention Time | Area    | Height | Concentration |
|-----|----------------|---------|--------|---------------|
| 1   | 18.534         | 1481358 | 41644  | 41.600        |
| 2   | 20.747         | 302512  | 8109   | 8.495         |
| 3   | 24.089         | 300793  | 7249   | 8.447         |
| 4   | 30.508         | 1476304 | 29109  | 41.458        |
| 总计  |                | 3560966 | 86111  |               |

### HPLC spectrum of *5i*

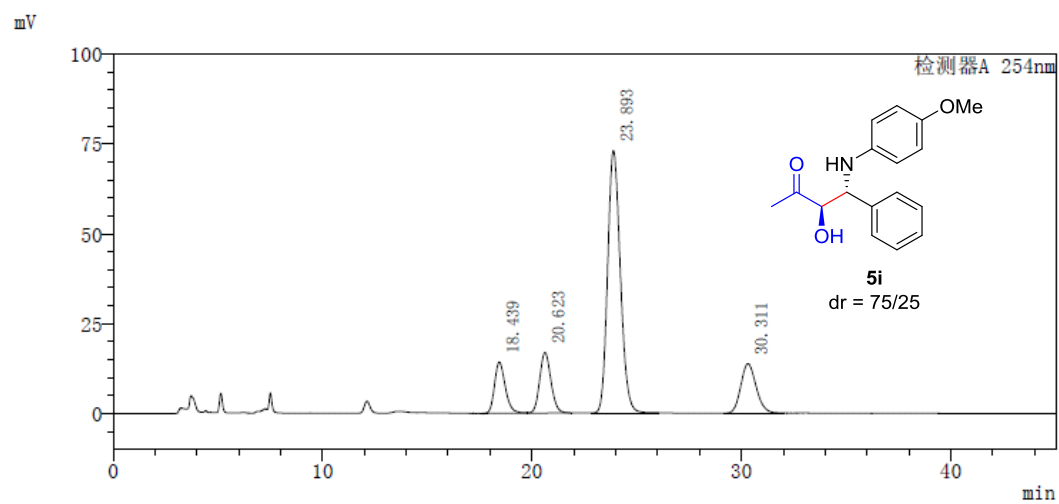

检测器A 254nm

| No. | Retention Time | Area    | Height | Concentration |
|-----|----------------|---------|--------|---------------|
| 1   | 18.439         | 510187  | 14251  | 10.405        |
| 2   | 20.623         | 629108  | 16874  | 12.831        |
| 3   | 23.893         | 3063393 | 73071  | 62.478        |
| 4   | 30.311         | 700480  | 13786  | 14.286        |
| 总计  |                | 4903167 | 117982 |               |

### HPLC spectrum of *Rac-5j*

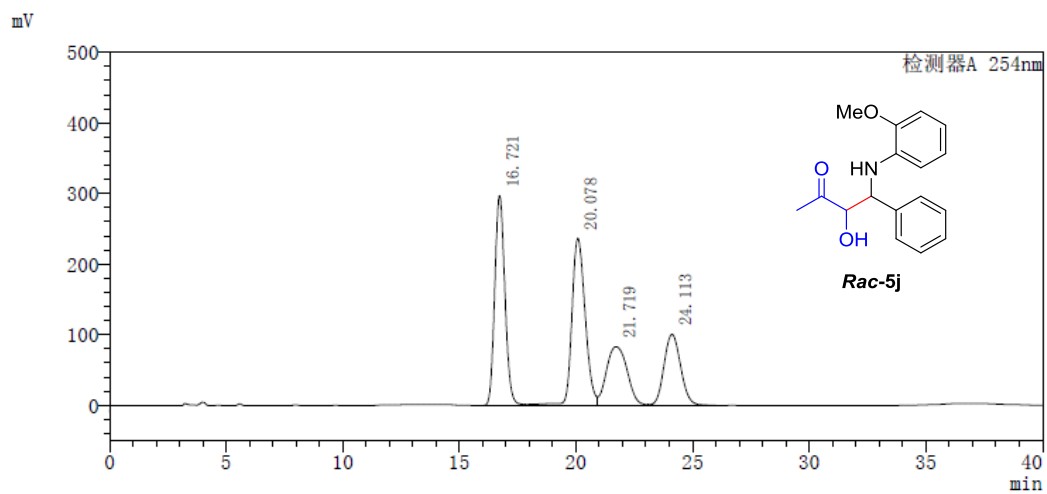

检测器A 254nm

| No. | Retention Time | Area     | Height | Concentration |
|-----|----------------|----------|--------|---------------|
| 1   | 16.721         | 9027205  | 297289 | 31.588        |
| 2   | 20.078         | 9402798  | 236550 | 32.903        |
| 3   | 21.719         | 5146899  | 83155  | 18.010        |
| 4   | 24.113         | 5000699  | 100772 | 17.499        |
| 总计  |                | 28577600 | 717765 |               |

### HPLC spectrum of *5j*

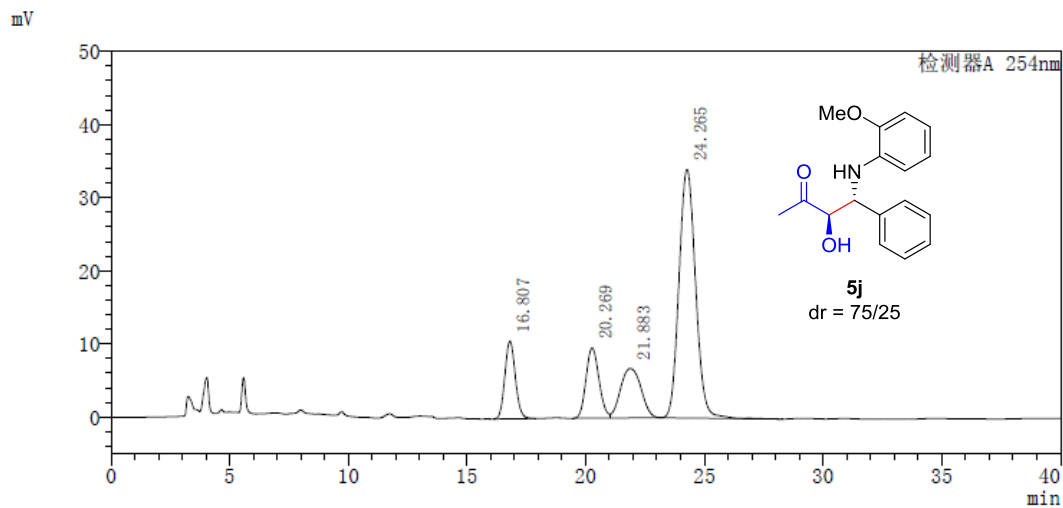

检测器A 254nm

| No. | Retention Time | Area    | Height | Concentration |
|-----|----------------|---------|--------|---------------|
| 1   | 16.807         | 325903  | 10623  | 11.887        |
| 2   | 20.269         | 365215  | 9584   | 13.321        |
| 3   | 21.883         | 404512  | 6744   | 14.754        |
| 4   | 24.265         | 1646094 | 33990  | 60.039        |
| 总计  |                | 2741724 | 60942  |               |

### HPLC spectrum of *Rac-5k*

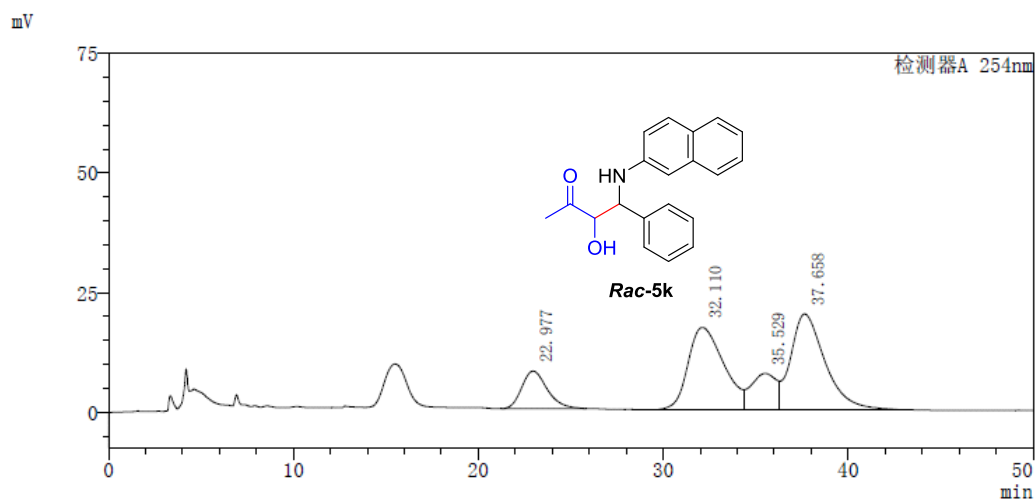

检测器A 254nm

| No. | Retention Time | Area    | Height | Concentration |
|-----|----------------|---------|--------|---------------|
| 1   | 22.977         | 748920  | 7842   | 11.816        |
| 2   | 32.110         | 2291920 | 17164  | 36.162        |
| 3   | 35.529         | 724891  | 7542   | 11.437        |
| 4   | 37.658         | 2572219 | 19965  | 40.584        |
| 总计  |                | 6337951 | 52513  |               |

### HPLC spectrum of *5k*

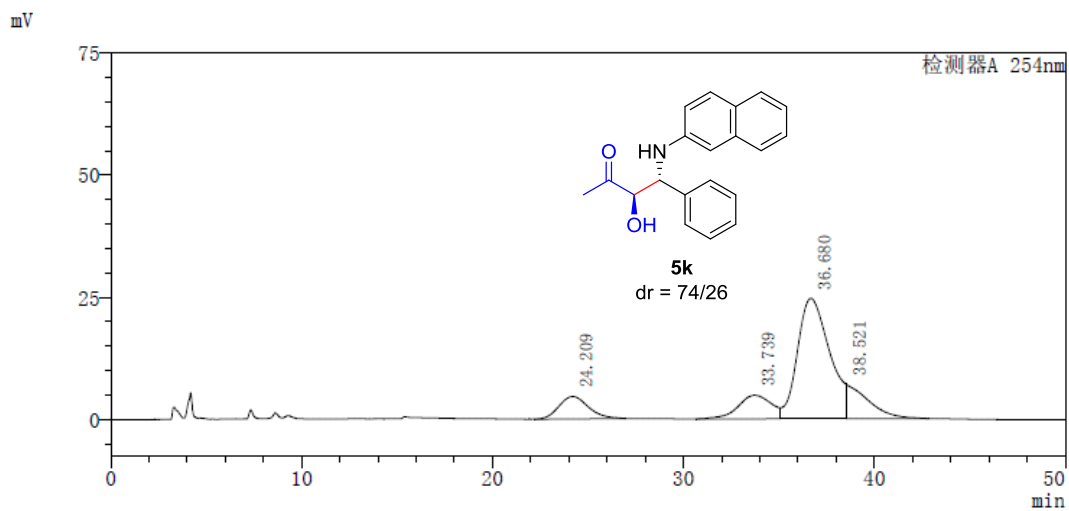

检测器A 254nm

| No. | Retention Time | Area    | Height | Concentration |
|-----|----------------|---------|--------|---------------|
| 1   | 24.209         | 489971  | 4577   | 10.824        |
| 2   | 33.739         | 590441  | 4847   | 13.044        |
| 3   | 36.680         | 2874182 | 24634  | 63.495        |
| 4   | 38.521         | 572019  | 7058   | 12.637        |
| 总计  |                | 4526614 | 41116  |               |

HPLC spectrum of **Rac-5I**



检测器A 254nm

| No. | Retention Time | Area     | Height | Concentration |
|-----|----------------|----------|--------|---------------|
| 1   | 19.889         | 14964440 | 192101 | 38.343        |
| 2   | 24.995         | 15951513 | 182189 | 40.872        |
| 3   | 25.813         | 4056313  | 68333  | 10.393        |
| 4   | 41.656         | 4055674  | 41684  | 10.392        |
| 总计  |                | 39027940 | 484306 |               |

HPLC spectrum of **5I**

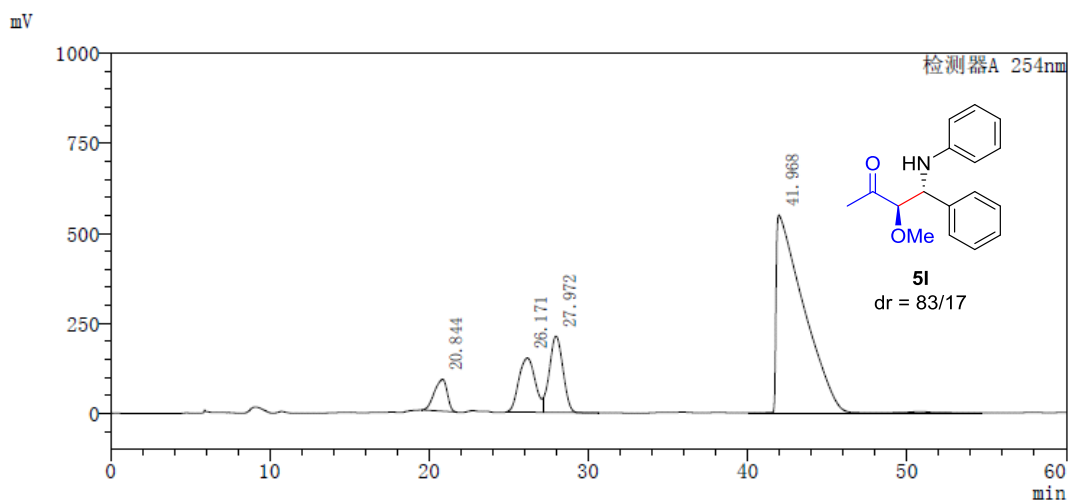

检测器A 254nm

| No. | Retention Time | Area     | Height  | Concentration |
|-----|----------------|----------|---------|---------------|
| 1   | 20.844         | 4933836  | 88521   | 5.228         |
| 2   | 26.171         | 10902284 | 150815  | 11.552        |
| 3   | 27.972         | 12578698 | 212517  | 13.328        |
| 4   | 41.968         | 65962502 | 548951  | 69.892        |
| 总计  |                | 94377320 | 1000804 |               |

### HPLC spectrum of *Rac-5m*

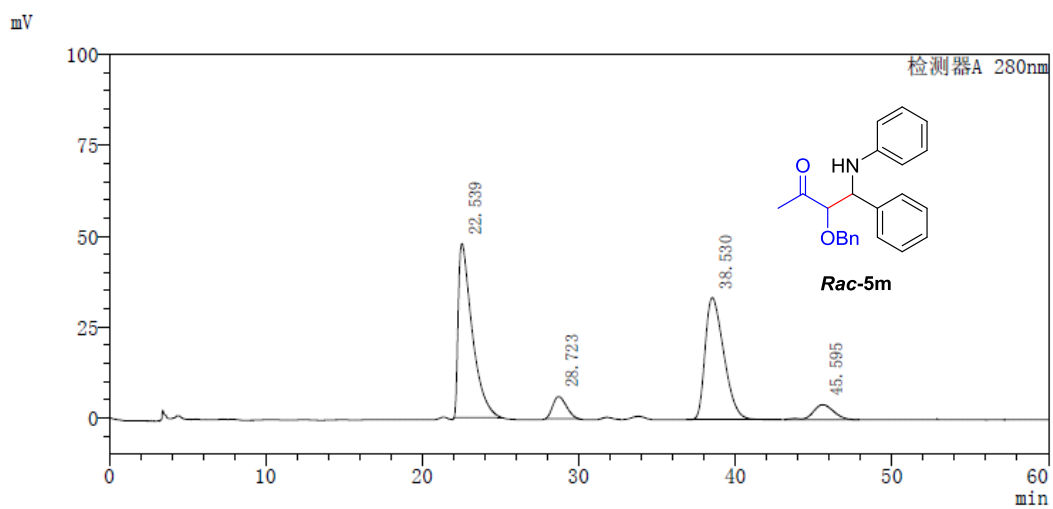

检测器A 280nm

| No. | Retention Time | Area    | Height | Concentration |
|-----|----------------|---------|--------|---------------|
| 1   | 22.539         | 2978868 | 47938  | 45.566        |
| 2   | 28.723         | 368617  | 6082   | 5.638         |
| 3   | 38.530         | 2804840 | 33615  | 42.904        |
| 4   | 45.595         | 385221  | 4148   | 5.892         |
| 总计  |                | 6537546 | 91782  |               |

### HPLC spectrum of *5m*

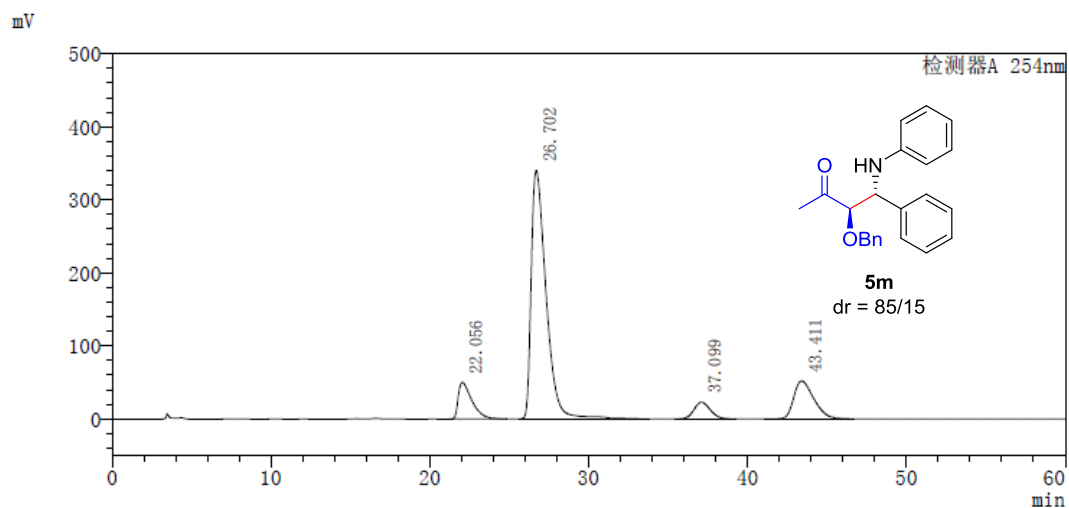

检测器A 254nm

| No. | Retention Time | Area     | Height | Concentration |
|-----|----------------|----------|--------|---------------|
| 1   | 22.056         | 2977804  | 50010  | 9.545         |
| 2   | 26.702         | 22084297 | 339942 | 70.792        |
| 3   | 37.099         | 1617680  | 22730  | 5.186         |
| 4   | 43.411         | 4516347  | 51753  | 14.477        |
| 总计  |                | 31196128 | 464435 |               |
